# Supplementary material for: Larval Helicoverpa zea Transcriptional, Growth and Behavioral Responses to Nicotine and Nicotiana tabacum
Source: Insects. 2014 Sep 12;5(3):668–88. doi: 10.3390/insects5030668 (PMC4592579; doi:10.3390/insects5030668)
Supplement: Supplementary File 1 [file insects-05-00668-s001.xlsx]

## Sheet: Sheet1
Condition 1 : con
Condition 2 : tob
Condition 3 : JA tob
Condition 4 : Nic
Statistics:	ANOVA
Correction:	Benjamini and Hochberg
Data Transformation:	Log Transformed
ANOVA	Benjamini and Hochberg	con	tob	ja tob	nic	Gene Identifier	Other ID	Gene Title
8e-06	0.0036176	1	41.2688	53.2651	6.56001	Har_00040834	Har_00040834	gi|111550264|gb|ABH10141.1|HMG176 [Helicoverpa armigera] >gi|116833119|gb|ABK29472.1| HMG176 [Helicoverpa armigera]
1e-06	0.00155931	1	39.7535	38.3802	8.15315	Har_00004503	Har_00004503	gi|171740897|gb|ACB54943.1|lipase [Helicoverpa armigera]
0.001161	0.0332357	1	23.0686	30.3695	10.2673	Har_00044205	Har_00044205	gi|162462783|ref|NP_001104822.1|carboxylesterase-6 [Bombyx mori] >gi|160694399|gb|ABX46627.1| carboxylesterase-6 [Bombyx mori]
0.001888	0.0430319	1	29.0939	8.95335	26.5505	Har_00201988	Har_00201988	na
0.001807	0.0421851	1	29.8647	12.9216	16.1445	Har_00064112	Har_00064112	gi|194277475|gb|ACF39402.1|takeout-like protein 2 [Epiphyas postvittana]
0.001084	0.0318923	1	24.9295	20.1944	10.0156	Har_00118352	Har_00118352	gi|90025232|gb|ABD85119.1|juvenile hormone epoxide hydrolase [Spodoptera exigua]
5e-06	0.00279136	1	16.0831	34.6202	6.60309	Har_00003693	Har_00003693	gi|74831719|emb|CAJ30028.1|carboxypeptidase B precursor [Helicoverpa zea]
3.5e-05	0.00676368	1	10.0461	35.7567	9.93117	Har_00080680	Har_00080680	gi|215262118|emb|CAR92522.1|putative dsRNase [Spodoptera littoralis]
3e-06	0.00233897	1	16.0632	8.32101	25.2613	Har_00178701	Har_00178701	na
2e-06	0.00210326	1	26.6627	22.4594	5.5033	Har_00008566	Har_00008566	gi|171740897|gb|ACB54943.1|lipase [Helicoverpa armigera]
0.000822	0.0274324	1	15.4033	13.9091	14.4915	Har_00002383	Har_00002383	gi|22725696|gb|AAN04900.1|aminopeptidase N [Helicoverpa armigera]
0	0	1	25.2031	25.9122	4.67366	Har_00030559	Har_00030559	gi|111550264|gb|ABH10141.1|HMG176 [Helicoverpa armigera] >gi|116833119|gb|ABK29472.1| HMG176 [Helicoverpa armigera]
0.002285	0.0472013	1	11.5768	18.5921	14.096	Har_00218028	Har_00218028	na
2e-05	0.00568805	1	13.84	25.6858	6.92022	Har_00081845	Har_00081845	gi|74831719|emb|CAJ30028.1|carboxypeptidase B precursor [Helicoverpa zea]
0.000483	0.0215185	1	13.6576	41.9905	4.23295	Har_00119628	Har_00119628	gi|148909011|gb|ABR17609.1|unknown [Picea sitchensis]
5.6e-05	0.00796327	1	16.6929	22.1552	5.84634	Har_00001788	Har_00001788	gi|171740921|gb|ACB54955.1|insect intestinal mucin 4 [Helicoverpa armigera]
4e-06	0.00254761	1	7.19553	13.1776	22.4792	Har_00016829	Har_00016829	gi|171740897|gb|ACB54943.1|lipase [Helicoverpa armigera]
5.1e-05	0.00751212	1	7.66558	30.8398	8.43228	Har_00094103	Har_00094103	gi|215262118|emb|CAR92522.1|putative dsRNase [Spodoptera littoralis]
0.000613	0.0239999	1	14.0164	18.0406	7.28643	Har_00003119	Har_00003119	gi|38455223|gb|AAR20817.1|putative midgut trypsin [Helicoverpa armigera]
0.000818	0.0273524	1	13.3044	18.3392	7.33734	Har_00003947	Har_00003947	gi|8347658|gb|AAF74743.1|AF261981_1trypsin precursor Hz8 [Helicoverpa zea]
0.000173	0.0130602	1	16.0802	11.2363	9.37306	Har_00117106	Har_00117106	gi|157829333|gb|ABK29477.1|acyl-CoA binding protein [Helicoverpa armigera]
4.9e-05	0.00748574	1	16.3363	8.79822	11.6925	Har_00001539	Har_00001539	gi|157829333|gb|ABK29477.1|acyl-CoA binding protein [Helicoverpa armigera]
0.000774	0.0267996	1	15.1903	14.6102	7.53722	Har_00039993	Har_00039993	gi|39579207|gb|AAR28763.1|odorant-binding protein-2 precursor [Spodoptera frugiperda]
4e-06	0.00254761	1	13.0997	19.2967	6.15025	Har_00117107	Har_00117107	gi|157829333|gb|ABK29477.1|acyl-CoA binding protein [Helicoverpa armigera]
0.000137	0.0119597	1	10.6431	22.1764	6.54658	Har_00022205	Har_00022205	gi|113208232|dbj|BAF03520.1|peptidoglycan recognition protein B [Samia cynthia ricini]
0.000697	0.0256247	1	21.3745	15.348	4.64839	Har_00083476	Har_00083476	gi|162462783|ref|NP_001104822.1|carboxylesterase-6 [Bombyx mori] >gi|160694399|gb|ABX46627.1| carboxylesterase-6 [Bombyx mori]
0.00017	0.0129418	1	12.3096	17.6304	5.95025	Har_00028831	Har_00028831	gi|171740905|gb|ACB54947.1|inactive lipase [Helicoverpa armigera]
8e-06	0.0036176	1	7.64657	18.1694	8.98615	Har_00114864	Har_00114864	gi|215262118|emb|CAR92522.1|putative dsRNase [Spodoptera littoralis]
2e-06	0.00210326	1	11.8689	8.69249	11.798	Har_00027006	Har_00027006	gi|156968283|gb|ABU98613.1|alpha-amylase [Helicoverpa armigera]
0.000285	0.0165481	1	10.2293	17.9867	6.39632	Har_00001092	Har_00001092	gi|113208232|dbj|BAF03520.1|peptidoglycan recognition protein B [Samia cynthia ricini]
0.0009	0.0289665	1	12.5939	12.7494	7.32813	Har_00003940	Har_00003940	gi|8347660|gb|AAF74744.1|AF261982_1trypsin precursor Hz1 [Helicoverpa zea]
0.001077	0.031828	1	9.22513	13.6984	8.24106	Har_00004698	Har_00004698	gi|156968285|gb|ABU98614.1|alpha-amylase [Helicoverpa armigera] >gi|171740895|gb|ACB54942.1| amylase [Helicoverpa armigera]
0.000797	0.027098	1	10.633	12.3214	7.57869	Har_00040389	Har_00040389	gi|113208232|dbj|BAF03520.1|peptidoglycan recognition protein B [Samia cynthia ricini]
4e-05	0.00709333	1	11.6128	19.0143	4.4602	Har_00033090	Har_00033090	gi|147953428|gb|ABK29468.1|lipase [Helicoverpa armigera]
3.2e-05	0.00673042	1	11.854	4.72063	17.5399	Har_00028022	Har_00028022	gi|2970687|gb|AAC06038.1|beta-glucosidase precursor [Spodoptera frugiperda]
2e-06	0.00210326	1	10.3446	10.6044	8.56252	Har_00027005	Har_00027005	gi|156968283|gb|ABU98613.1|alpha-amylase [Helicoverpa armigera]
5e-05	0.00751163	1	10.1993	16.5588	5.52779	Har_00041775	Har_00041775	gi|171740905|gb|ACB54947.1|inactive lipase [Helicoverpa armigera]
4.8e-05	0.00745897	1	15.5453	10.9679	5.14521	Har_00083416	Har_00083416	gi|189236687|ref|XP_973103.2|PREDICTED: similar to AGAP003501-PA [Tribolium castaneum]
0.000298	0.0168169	1	9.52316	15.9253	5.41616	Har_00029594	Har_00029594	gi|113208232|dbj|BAF03520.1|peptidoglycan recognition protein B [Samia cynthia ricini]
0.000112	0.0107988	1	11.5523	3.44273	19.8121	Har_00028025	Har_00028025	gi|2970687|gb|AAC06038.1|beta-glucosidase precursor [Spodoptera frugiperda]
0.000445	0.0205756	1	8.98544	17.0865	5.01489	Har_00042430	Har_00042430	gi|113208232|dbj|BAF03520.1|peptidoglycan recognition protein B [Samia cynthia ricini]
0.00094	0.0299241	1	9.41809	10.1729	8.0154	Har_00042426	Har_00042426	gi|113208232|dbj|BAF03520.1|peptidoglycan recognition protein B [Samia cynthia ricini]
0.000418	0.0199598	1	9.46347	10.1518	7.96774	Har_00022204	Har_00022204	gi|113208232|dbj|BAF03520.1|peptidoglycan recognition protein B [Samia cynthia ricini]
0.000156	0.0126102	1	10.3838	14.4654	4.91254	Har_00031046	Har_00031046	gi|147953428|gb|ABK29468.1|lipase [Helicoverpa armigera]
0.001076	0.031828	1	9.49087	11.3657	6.7898	Har_00040388	Har_00040388	gi|113208232|dbj|BAF03520.1|peptidoglycan recognition protein B [Samia cynthia ricini]
0.001265	0.0347804	1	8.05883	40.0747	2.24186	Har_00043942	Har_00043942	gi|56462126|gb|AAV91346.1|cuticle protein 1 [Lonomia obliqua]
8e-06	0.0036176	1	6.356	7.73505	14.5163	Har_00016830	Har_00016830	gi|171740897|gb|ACB54943.1|lipase [Helicoverpa armigera]
1.6e-05	0.0049219	1	17.4064	11.4852	3.52235	Har_00030561	Har_00030561	gi|111550264|gb|ABH10141.1|HMG176 [Helicoverpa armigera] >gi|116833119|gb|ABK29472.1| HMG176 [Helicoverpa armigera]
0.000217	0.014242	1	10.5349	7.91807	8.02877	Har_00002405	Har_00002405	gi|15212555|gb|AAK85538.1|aminopeptidase N [Helicoverpa armigera]
0.000231	0.0147124	1	10.8305	9.90962	6.07086	Har_00001837	Har_00001837	gi|171740905|gb|ACB54947.1|inactive lipase [Helicoverpa armigera]
0.000218	0.0142869	1	11.2951	8.40327	6.82704	Har_00002206	Har_00002206	gi|184161310|gb|ACC68682.1|aminopeptidase N [Helicoverpa armigera]
4e-05	0.00709333	1	9.00608	4.90352	14.1865	Har_00092311	Har_00092311	gi|2970687|gb|AAC06038.1|beta-glucosidase precursor [Spodoptera frugiperda]
0.000112	0.0107988	1	10.3036	10.7423	5.58606	Har_00041772	Har_00041772	gi|171740905|gb|ACB54947.1|inactive lipase [Helicoverpa armigera]
0.000242	0.0151568	1	11.9499	6.92754	7.37664	Har_00003327	Har_00003327	gi|17027158|gb|AAL34109.1|AF441377_1aminopeptidase N1 [Helicoverpa armigera]
0.000328	0.0175736	1	9.79632	13.9743	4.43394	Har_00003421	Har_00003421	gi|2853013|gb|AAC02216.1|putative trypsin [Helicoverpa armigera]
2.3e-05	0.00601191	1	9.05045	15.3677	4.27439	Har_00004152	Har_00004152	gi|83320487|gb|ABC02870.1|fatty acid binding protein [Helicoverpa assulta]
7.3e-05	0.00887382	1	6.00271	15.1537	6.41178	Har_00080687	Har_00080687	gi|215262118|emb|CAR92522.1|putative dsRNase [Spodoptera littoralis]
9.5e-05	0.00994421	1	10.061	5.78943	9.98374	Har_00106036	Har_00106036	gi|33151028|gb|AAP97393.1|alpha-amylase 2 [Diatraea saccharalis]
0.000408	0.0196274	1	8.89085	13.8255	4.58147	Har_00003912	Har_00003912	gi|8347670|gb|AAF74749.1|AF261987_1putative trypsin precursor Hz2 [Helicoverpa zea]
1.6e-05	0.0049219	1	8.5376	10.7948	5.99742	Har_00047912	Har_00047912	gi|83320487|gb|ABC02870.1|fatty acid binding protein [Helicoverpa assulta]
0.000625	0.0242181	1	9.92137	9.88938	5.61595	Har_00001943	Har_00001943	gi|147953428|gb|ABK29468.1|lipase [Helicoverpa armigera]
1.8e-05	0.00528545	1	9.04262	10.1523	5.98351	Har_00008567	Har_00008567	gi|171740897|gb|ACB54943.1|lipase [Helicoverpa armigera]
0.000294	0.0167019	1	9.98656	8.6191	6.37302	Har_00003170	Har_00003170	gi|34100666|gb|AAQ57406.1|aminopeptidase N1 [Helicoverpa armigera]
0.000391	0.019094	1	7.23333	8.17325	8.99192	Har_00002073	Har_00002073	gi|156968285|gb|ABU98614.1|alpha-amylase [Helicoverpa armigera] >gi|171740895|gb|ACB54942.1| amylase [Helicoverpa armigera]
0.000588	0.0235096	1	8.30909	12.7799	4.97405	Har_00107090	Har_00107090	gi|156968305|gb|ABU98624.1|protease [Helicoverpa armigera]
1.1e-05	0.0042881	1	9.01302	11.5225	4.97354	Har_00003698	Har_00003698	gi|74831719|emb|CAJ30028.1|carboxypeptidase B precursor [Helicoverpa zea]
0.000927	0.0296038	1	8.33158	8.38767	7.35446	Har_00061212	Har_00061212	gi|156968285|gb|ABU98614.1|alpha-amylase [Helicoverpa armigera] >gi|171740895|gb|ACB54942.1| amylase [Helicoverpa armigera]
4.7e-05	0.00737965	1	6.40747	19.9049	4.01167	Har_00002778	Har_00002778	gi|2463060|emb|CAA72950.1|trypsin-like protease [Helicoverpa armigera] >gi|145843822|gb|ABP96918.1| serine protease 5 [Helicoverpa armigera]
0.000856	0.0281106	1	8.26274	8.15916	7.50187	Har_00013083	Har_00013083	gi|156968285|gb|ABU98614.1|alpha-amylase [Helicoverpa armigera] >gi|171740895|gb|ACB54942.1| amylase [Helicoverpa armigera]
0.000233	0.0147981	1	6.58521	8.98501	8.54671	Har_00001871	Har_00001871	gi|156968285|gb|ABU98614.1|alpha-amylase [Helicoverpa armigera] >gi|171740895|gb|ACB54942.1| amylase [Helicoverpa armigera]
0.001842	0.0427594	1	7.47043	7.26062	9.23487	Har_00075895	Har_00075895	gi|30961819|gb|AAP37950.1|midgut aminopeptidase N4 [Helicoverpa armigera]
4.4e-05	0.0072882	1	9.24921	6.85525	7.87025	Har_00002078	Har_00002078	gi|156968283|gb|ABU98613.1|alpha-amylase [Helicoverpa armigera]
0.00076	0.026477	1	5.82137	37.3025	2.21482	Har_00033710	Har_00033710	gi|223671184|tpd|FAA00544.1|TPA: putative cuticle protein [Bombyx mori]
0.000251	0.0154846	1	8.10083	15.2754	3.87201	Har_00072324	Har_00072324	gi|113208232|dbj|BAF03520.1|peptidoglycan recognition protein B [Samia cynthia ricini]
0.000545	0.0227136	1	9.63167	7.14501	6.79252	Har_00003134	Har_00003134	gi|38455215|gb|AAR20813.1|aminopeptidase N1 [Helicoverpa armigera]
0.000808	0.0272798	1	6.84742	9.51979	7.10444	Har_00061214	Har_00061214	gi|156968285|gb|ABU98614.1|alpha-amylase [Helicoverpa armigera] >gi|171740895|gb|ACB54942.1| amylase [Helicoverpa armigera]
3.9e-05	0.00708265	1	6.08352	29.7084	2.54434	Har_00086588	Har_00086588	gi|726332|gb|AAA68242.1|juvenile hormone binding protein
4.5e-05	0.00734621	1	9.65306	3.99091	11.8776	Har_00093096	Har_00093096	gi|2970687|gb|AAC06038.1|beta-glucosidase precursor [Spodoptera frugiperda]
8.9e-05	0.00972121	1	7.37526	6.82644	8.8207	Har_00063541	Har_00063541	gi|156968283|gb|ABU98613.1|alpha-amylase [Helicoverpa armigera]
0.002261	0.0469433	1	8.31203	7.77881	6.80219	Har_00121862	Har_00121862	gi|30961823|gb|AAP37952.1|midgut aminopeptidase N3 [Helicoverpa armigera]
0	0	1	8.18691	7.07485	7.52733	Har_00049021	Har_00049021	gi|196121924|gb|ACG69475.1|astacin [Spodoptera frugiperda]
2.8e-05	0.0062993	1	7.78687	13.1774	4.21684	Har_00119967	Har_00119967	na
0.001928	0.0433752	1	6.79663	8.23792	7.67757	Har_00075897	Har_00075897	gi|30961819|gb|AAP37950.1|midgut aminopeptidase N4 [Helicoverpa armigera]
0.000683	0.0252951	1	7.80279	8.30569	6.12521	Har_00001869	Har_00001869	gi|156968285|gb|ABU98614.1|alpha-amylase [Helicoverpa armigera] >gi|171740895|gb|ACB54942.1| amylase [Helicoverpa armigera]
0.001799	0.0420417	1	8.9209	7.57796	5.81607	Har_00003243	Har_00003243	gi|28558818|gb|AAL14117.2|aminopeptidase N [Helicoverpa armigera]
0.000826	0.0275049	1	6.97524	12.8292	4.34568	Har_00086578	Har_00086578	gi|726332|gb|AAA68242.1|juvenile hormone binding protein
0.000123	0.0113278	1	7.47167	14.1595	3.58392	Har_00001844	Har_00001844	gi|171740903|gb|ACB54946.1|inactive lipase [Helicoverpa armigera]
0.002201	0.0463301	1	5.89153	5.24148	12.2555	Har_00001986	Har_00001986	na
0.001384	0.0365564	1	8.23287	9.69161	4.53416	Har_00108733	Har_00108733	gi|156968305|gb|ABU98624.1|protease [Helicoverpa armigera]
5.1e-05	0.00751212	1	9.21881	6.59371	5.73415	Har_00002205	Har_00002205	gi|184161312|gb|ACC68683.1|aminopeptidase N [Helicoverpa armigera]
0.000406	0.019552	1	7.219	17.9114	2.67015	Har_00015172	Har_00015172	gi|223671093|tpd|FAA00498.1|TPA: putative cuticle protein [Bombyx mori]
3.7e-05	0.0069138	1	9.08634	9.85796	3.64634	Har_00001730	Har_00001730	gi|116833105|gb|ABK29465.1|trypsinogen Y precursor [Helicoverpa armigera]
0.000449	0.0206339	1	5.86943	9.68143	5.71784	Har_00072321	Har_00072321	gi|113208232|dbj|BAF03520.1|peptidoglycan recognition protein B [Samia cynthia ricini]
0.000379	0.0187921	1	6.76292	8.8737	5.39763	Har_00002348	Har_00002348	gi|145843816|gb|ABP96915.1|serine protease 2 [Helicoverpa armigera]
0.000512	0.0221133	1	8.26061	7.30173	5.28209	Har_00080190	Har_00080190	gi|15212555|gb|AAK85538.1|aminopeptidase N [Helicoverpa armigera]
0	0	1	13.4019	10.8633	2.17667	Har_00076114	Har_00076114	gi|157136230|ref|XP_001656785.1|alpha-amylase [Aedes aegypti] >gi|108881053|gb|EAT45278.1| alpha-amylase [Aedes aegypti]
0.000205	0.0138415	1	5.88222	10.5908	5.01316	Har_00070590	Har_00070590	gi|2463066|emb|CAA72953.1|diverged serine protease [Helicoverpa armigera]
0.001094	0.0320126	1	4.49824	5.25399	13.0316	Har_00009408	Har_00009408	gi|153792257|ref|NP_001093273.1|trypsin-like protease [Bombyx mori] >gi|95102922|gb|ABF51402.1| trypsin-like protease [Bombyx mori]
1.5e-05	0.00474336	1	6.30974	7.59474	6.341	Har_00082219	Har_00082219	gi|116780454|gb|ABK21687.1|unknown [Picea sitchensis]
0.001098	0.0320126	1	6.58357	7.70887	5.95888	Har_00013082	Har_00013082	gi|156968285|gb|ABU98614.1|alpha-amylase [Helicoverpa armigera] >gi|171740895|gb|ACB54942.1| amylase [Helicoverpa armigera]
2.7e-05	0.00626123	1	6.67758	4.68093	9.56017	Har_00099849	Har_00099849	gi|187884606|gb|ACD37364.1|pancreatic lipase 2 [Mamestra configurata]
0.001468	0.0375682	1	9.22104	6.3684	5.04887	Har_00003173	Har_00003173	gi|34100664|gb|AAQ57405.1|aminopeptidase N1 [Helicoverpa armigera]
0.002313	0.0474995	1	7.32968	5.31147	7.51905	Har_00001780	Har_00001780	gi|171740923|gb|ACB54956.1|polycalin [Helicoverpa armigera] >gi|171740925|gb|ACB54957.1| polycalin [Helicoverpa armigera]
0.002145	0.0460137	1	6.02545	9.36792	5.02903	Har_00001094	Har_00001094	gi|113208232|dbj|BAF03520.1|peptidoglycan recognition protein B [Samia cynthia ricini]
1.5e-05	0.00474336	1	7.11607	11.9908	3.29334	Har_00001845	Har_00001845	gi|171740903|gb|ACB54946.1|inactive lipase [Helicoverpa armigera]
0.002287	0.0472013	1	6.96913	7.95845	5.04746	Har_00012690	Har_00012690	gi|171740881|gb|ACB54935.1|chitin deacetylase [Helicoverpa armigera]
0.000155	0.0126102	1	11.3235	3.06123	7.90528	Har_00061736	Har_00061736	gi|156543585|ref|XP_001603982.1|PREDICTED: similar to myo-inositol dehydrogenase [Nasonia vitripennis]
0.001247	0.0345523	1	6.4991	7.33003	5.70082	Har_00049709	Har_00049709	gi|156968285|gb|ABU98614.1|alpha-amylase [Helicoverpa armigera] >gi|171740895|gb|ACB54942.1| amylase [Helicoverpa armigera]
0.00064	0.0245261	1	9.56849	6.22076	4.53657	Har_00003171	Har_00003171	gi|34100666|gb|AAQ57406.1|aminopeptidase N1 [Helicoverpa armigera]
0.000167	0.012865	1	9.08944	6.20534	4.64565	Har_00002200	Har_00002200	gi|184161312|gb|ACC68683.1|aminopeptidase N [Helicoverpa armigera]
0.001089	0.0319527	1	7.48592	5.57136	6.28233	Har_00003324	Har_00003324	gi|17027158|gb|AAL34109.1|AF441377_1aminopeptidase N1 [Helicoverpa armigera]
2.5e-05	0.00609181	1	6.30966	3.51253	11.5604	Har_00099848	Har_00099848	gi|187884606|gb|ACD37364.1|pancreatic lipase 2 [Mamestra configurata]
9.1e-05	0.00982105	1	6.73818	12.3109	3.08564	Har_00001997	Har_00001997	gi|156968309|gb|ABU98626.1|lipase-like protein [Helicoverpa armigera]
1.4e-05	0.00462102	1	7.3107	7.49454	4.66039	Har_00004030	Har_00004030	gi|3290207|gb|AAC25674.1|fatty acid binding protein [Helicoverpa zea]
0.000185	0.0134066	1	4.73289	6.64583	8.05252	Har_00101829	Har_00101829	gi|171740897|gb|ACB54943.1|lipase [Helicoverpa armigera]
4.6e-05	0.00737965	1	8.50222	7.30999	4.07401	Har_00004149	Har_00004149	gi|83320487|gb|ABC02870.1|fatty acid binding protein [Helicoverpa assulta]
0.00072	0.0258811	1	8.47632	5.27422	5.66324	Har_00028829	Har_00028829	gi|171740905|gb|ACB54947.1|inactive lipase [Helicoverpa armigera]
3.6e-05	0.00684	1	7.36017	6.61302	5.19672	Har_00001937	Har_00001937	gi|147953428|gb|ABK29468.1|lipase [Helicoverpa armigera]
9.5e-05	0.00994421	1	8.80795	3.83144	7.39724	Har_00116058	Har_00116058	gi|2970687|gb|AAC06038.1|beta-glucosidase precursor [Spodoptera frugiperda]
3.4e-05	0.00676368	1	6.14467	6.6196	6.079	Har_00044980	Har_00044980	gi|116780454|gb|ABK21687.1|unknown [Picea sitchensis]
0.000814	0.0272862	1	4.86089	7.17098	7.06383	Har_00084808	Har_00084808	gi|116780454|gb|ABK21687.1|unknown [Picea sitchensis]
0.000326	0.0175706	1	9.05884	5.90266	4.49975	Har_00003133	Har_00003133	gi|38455215|gb|AAR20813.1|aminopeptidase N1 [Helicoverpa armigera]
0.001035	0.0311188	1	6.72992	8.25993	4.21558	Har_00003913	Har_00003913	gi|8347668|gb|AAF74748.1|AF261986_1putative trypsin precursor Hz17 [Helicoverpa zea]
9.8e-05	0.0100035	1	11.0083	6.33304	3.34074	Har_00032463	Har_00032463	gi|116833105|gb|ABK29465.1|trypsinogen Y precursor [Helicoverpa armigera]
1e-06	0.00155931	1	7.55253	6.0731	5.05651	Har_00063540	Har_00063540	gi|156968283|gb|ABU98613.1|alpha-amylase [Helicoverpa armigera]
0.00046	0.0208638	1	7.76571	5.43899	5.42957	Har_00095972	Har_00095972	gi|118788042|ref|XP_557100.2|AGAP006426-PA [Anopheles gambiae str. PEST] >gi|116127088|gb|EAL40075.2| AGAP006426-PA [Anopheles gambiae str. PEST]
0.000806	0.0272401	1	8.97111	5.57753	4.56263	Har_00003070	Har_00003070	gi|41350253|gb|AAS00451.1|aminopeptidase N1 [Helicoverpa armigera]
0.000198	0.0137114	1	6.46229	10.2331	3.43938	Har_00107091	Har_00107091	gi|156968305|gb|ABU98624.1|protease [Helicoverpa armigera]
0.000646	0.0246724	1	5.71812	6.94041	5.60157	Har_00002071	Har_00002071	gi|156968285|gb|ABU98614.1|alpha-amylase [Helicoverpa armigera] >gi|171740895|gb|ACB54942.1| amylase [Helicoverpa armigera]
0.0014	0.0367216	1	7.59435	7.04352	4.09368	Har_00074675	Har_00074675	gi|156968293|gb|ABU98618.1|protease [Helicoverpa armigera]
0.000954	0.0300626	1	5.25903	11.2149	3.69018	Har_00075880	Har_00075880	gi|74831719|emb|CAJ30028.1|carboxypeptidase B precursor [Helicoverpa zea]
6e-06	0.00301467	1	7.09572	3.37045	9.01027	Har_00113005	Har_00113005	gi|116788248|gb|ABK24806.1|unknown [Picea sitchensis]
5.9e-05	0.00808479	1	5.85074	7.06206	5.1861	Har_00080116	Har_00080116	gi|116780454|gb|ABK21687.1|unknown [Picea sitchensis]
0.000179	0.0133131	1	7.24813	9.02576	3.26818	Har_00081035	Har_00081035	gi|171740903|gb|ACB54946.1|inactive lipase [Helicoverpa armigera]
0.001651	0.040182	1	5.31926	6.06346	6.45039	Har_00003206	Har_00003206	gi|30961819|gb|AAP37950.1|midgut aminopeptidase N4 [Helicoverpa armigera]
9.1e-05	0.00982105	1	6.51902	11.6832	2.68875	Har_00004034	Har_00004034	gi|3290207|gb|AAC25674.1|fatty acid binding protein [Helicoverpa zea]
0.000779	0.0268289	1	7.53627	7.8219	3.39701	Har_00222467	Har_00222467	na
0.000101	0.0101269	1	5.27551	5.94242	6.3737	Har_00070587	Har_00070587	gi|2463066|emb|CAA72953.1|diverged serine protease [Helicoverpa armigera]
0	0	1	7.57503	9.97881	2.62106	Har_00101568	Har_00101568	gi|153791757|ref|NP_001093275.1|myo-inositol oxygenase [Bombyx mori] >gi|95102966|gb|ABF51424.1| myo-inositol oxygenase [Bombyx mori]
0.000451	0.0207048	1	5.29269	7.56117	4.89446	Har_00088037	Har_00088037	gi|2463056|emb|CAA72948.1|trypsin-like protease [Helicoverpa armigera]
0.000796	0.027098	1	7.13892	6.67795	4.09662	Har_00050436	Har_00050436	gi|156968309|gb|ABU98626.1|lipase-like protein [Helicoverpa armigera]
2.4e-05	0.00609181	1	5.09937	17.0124	2.20584	Har_00121616	Har_00121616	gi|726332|gb|AAA68242.1|juvenile hormone binding protein
0.00102	0.0309976	1	7.54398	5.33909	4.62892	Har_00003131	Har_00003131	gi|38455217|gb|AAR20814.1|aminopeptidase N1 [Helicoverpa armigera]
0.001102	0.0320224	1	6.76581	5.29632	5.20193	Har_00003200	Har_00003200	gi|30961823|gb|AAP37952.1|midgut aminopeptidase N3 [Helicoverpa armigera]
0.000128	0.0115302	1	4.90298	5.85943	6.28194	Har_00006440	Har_00006440	gi|116780454|gb|ABK21687.1|unknown [Picea sitchensis]
0.0005	0.0219089	1	5.58357	9.1446	3.47488	Har_00016883	Har_00016883	gi|156968305|gb|ABU98624.1|protease [Helicoverpa armigera]
0.00134	0.0358549	1	4.83164	7.65203	4.73158	Har_00103071	Har_00103071	gi|74831719|emb|CAJ30028.1|carboxypeptidase B precursor [Helicoverpa zea]
0.000189	0.0135517	1	4.76399	4.9634	6.90131	Har_00067495	Har_00067495	gi|2463066|emb|CAA72953.1|diverged serine protease [Helicoverpa armigera]
2.3e-05	0.00601191	1	4.62945	4.80501	7.31283	Har_00011198	Har_00011198	gi|116780454|gb|ABK21687.1|unknown [Picea sitchensis]
1e-06	0.00155931	1	6.03948	5.19608	5.15246	Har_00067339	Har_00067339	gi|157123534|ref|XP_001660190.1|niemann-pick C1 [Aedes aegypti] >gi|108874358|gb|EAT38583.1| niemann-pick C1 [Aedes aegypti]
0.000601	0.0237979	1	8.84399	5.05274	3.56926	Har_00002408	Har_00002408	gi|15212555|gb|AAK85538.1|aminopeptidase N [Helicoverpa armigera]
0.000563	0.0231234	1	11.7909	2.38893	5.53202	Har_00085872	Har_00085872	gi|156546367|ref|XP_001606773.1|PREDICTED: hypothetical protein [Nasonia vitripennis]
1.8e-05	0.00528545	1	4.86843	13.3815	2.37436	Har_00046015	Har_00046015	gi|196121924|gb|ACG69475.1|astacin [Spodoptera frugiperda]
0.001289	0.0352197	1	5.90084	8.39645	3.09416	Har_00196387	Har_00196387	na
0.001731	0.0413065	1	5.71055	8.04668	3.30672	Har_00081533	Har_00081533	gi|13235568|emb|CAC33575.1|antennal binding protein [Heliothis virescens]
4.8e-05	0.00745897	1	5.15871	5.75131	5.11686	Har_00102873	Har_00102873	gi|116780454|gb|ABK21687.1|unknown [Picea sitchensis]
0.002406	0.0484172	1	6.62798	5.32023	4.29221	Har_00001929	Har_00001929	gi|171740879|gb|ACB54934.1|insect intestinal mucin 1 [Helicoverpa armigera]
6.8e-05	0.00858927	1	4.55411	5.46045	6.07919	Har_00082220	Har_00082220	gi|116780454|gb|ABK21687.1|unknown [Picea sitchensis]
6e-06	0.00301467	1	4.70081	4.17999	7.63501	Har_00011196	Har_00011196	gi|116780454|gb|ABK21687.1|unknown [Picea sitchensis]
0.00175	0.0415625	1	6.85815	5.25423	3.99809	Har_00002042	Har_00002042	gi|156968293|gb|ABU98618.1|protease [Helicoverpa armigera]
0.000155	0.0126102	1	4.69801	7.94838	3.85067	Har_00188579	Har_00188579	na
0.001925	0.0433508	1	5.08372	3.13304	8.97545	Har_00014625	Har_00014625	gi|195024823|ref|XP_001985943.1|GH20813 [Drosophila grimshawi] >gi|193901943|gb|EDW00810.1| GH20813 [Drosophila grimshawi]
0.000301	0.0168664	1	5.24779	4.99727	5.43854	Har_00002757	Har_00002757	gi|2463066|emb|CAA72953.1|diverged serine protease [Helicoverpa armigera]
0.000645	0.024655	1	4.68575	6.08906	4.95165	Har_00002759	Har_00002759	gi|2463066|emb|CAA72953.1|diverged serine protease [Helicoverpa armigera]
0.000544	0.0227136	1	6.98408	4.58576	4.35893	Har_00117312	Har_00117312	gi|2970687|gb|AAC06038.1|beta-glucosidase precursor [Spodoptera frugiperda]
0.000121	0.0112354	1	5.26003	4.92564	5.37271	Har_00004509	Har_00004509	gi|171740897|gb|ACB54943.1|lipase [Helicoverpa armigera]
2.3e-05	0.00601191	1	4.13223	5.10701	6.57062	Har_00087991	Har_00087991	gi|116780454|gb|ABK21687.1|unknown [Picea sitchensis]
0.000849	0.0279416	1	6.93361	2.47789	7.82758	Har_00072904	Har_00072904	gi|2970687|gb|AAC06038.1|beta-glucosidase precursor [Spodoptera frugiperda]
0.002063	0.0449368	1	7.89331	6.9523	2.42011	Har_00000999	Har_00000999	gi|111550264|gb|ABH10141.1|HMG176 [Helicoverpa armigera] >gi|116833119|gb|ABK29472.1| HMG176 [Helicoverpa armigera]
0.00207	0.0450676	1	5.89663	4.80494	4.68166	Har_00003197	Har_00003197	gi|30961825|gb|AAP37953.1|midgut aminopeptidase N3 [Helicoverpa armigera]
0.000732	0.0261049	1	10.3352	2.49884	5.13595	Har_00085874	Har_00085874	gi|156546367|ref|XP_001606773.1|PREDICTED: hypothetical protein [Nasonia vitripennis]
0.002521	0.0493469	1	5.17239	5.48382	4.61634	Har_00049710	Har_00049710	gi|156968285|gb|ABU98614.1|alpha-amylase [Helicoverpa armigera] >gi|171740895|gb|ACB54942.1| amylase [Helicoverpa armigera]
0.001391	0.0366279	1	7.64406	3.18778	5.25478	Har_00003074	Har_00003074	gi|41350253|gb|AAS00451.1|aminopeptidase N1 [Helicoverpa armigera]
0.001034	0.0311188	1	6.96663	4.73666	3.85989	Har_00005303	Har_00005303	gi|156968293|gb|ABU98618.1|protease [Helicoverpa armigera]
1.5e-05	0.00474336	1	2.86104	21.1238	2.08604	Har_00221803	Har_00221803	na
0.001629	0.0399072	1	4.40948	4.08677	6.91558	Har_00001865	Har_00001865	gi|171740897|gb|ACB54943.1|lipase [Helicoverpa armigera]
0.000186	0.013436	1	3.42618	14.0809	2.58007	Har_00023467	Har_00023467	gi|156619504|gb|ABU88426.1|glutathione S-transferase GSTX01 [Helicoverpa armigera]
0.000616	0.0240549	1	5.60424	5.85561	3.76398	Har_00003907	Har_00003907	gi|8347672|gb|AAF74750.1|AF261988_1putative trypsin precursor Hz3 [Helicoverpa zea]
0.000265	0.0159777	1	4.43383	7.83679	3.48868	Har_00051747	Har_00051747	gi|215262118|emb|CAR92522.1|putative dsRNase [Spodoptera littoralis]
0.00019	0.0135517	1	16.7669	13.9376	1.9287	Har_00101322	Har_00101322	gi|112983800|ref|NP_001037382.1|uricase [Bombyx mori] >gi|76156035|gb|ABA39861.1| uricase [Bombyx mori]
0	0	1	6.63563	6.3681	2.83613	Har_00076377	Har_00076377	gi|2970687|gb|AAC06038.1|beta-glucosidase precursor [Spodoptera frugiperda]
3.5e-05	0.00676368	1	5.13819	4.22576	5.50121	Har_00035927	Har_00035927	gi|116780454|gb|ABK21687.1|unknown [Picea sitchensis]
0.000303	0.016874	1	6.24958	3.85418	4.94212	Har_00117306	Har_00117306	gi|2970687|gb|AAC06038.1|beta-glucosidase precursor [Spodoptera frugiperda]
0.000358	0.0184803	1	4.89561	39.3134	1.69089	Har_00033713	Har_00033713	gi|223671184|tpd|FAA00544.1|TPA: putative cuticle protein [Bombyx mori]
0.001607	0.039623	1	5.66432	6.49182	3.06918	Har_00071436	Har_00071436	gi|171740881|gb|ACB54935.1|chitin deacetylase [Helicoverpa armigera]
0.000438	0.0204823	1	3.17375	14.5606	2.43406	Har_00002152	Har_00002152	gi|156619504|gb|ABU88426.1|glutathione S-transferase GSTX01 [Helicoverpa armigera]
6.5e-05	0.00837407	1	14.8483	14.9353	1.97496	Har_00069635	Har_00069635	gi|112983800|ref|NP_001037382.1|uricase [Bombyx mori] >gi|76156035|gb|ABA39861.1| uricase [Bombyx mori]
0.000116	0.0109969	1	3.89607	4.68445	6.11842	Har_00026510	Har_00026510	gi|116780454|gb|ABK21687.1|unknown [Picea sitchensis]
0.001857	0.0428874	1	7.03055	2.75894	5.4862	Har_00054120	Har_00054120	gi|170045018|ref|XP_001850121.1|peroxisomal N1-acetyl-spermine/spermidine oxidase [Culex quinquefasciatus] >gi|167868073|gb|EDS31456.1| peroxisomal N1-acetyl-spermine/spermidine oxidase [Culex quinquefasciatus]
1e-06	0.00155931	1	3.31352	13.9272	2.29012	Har_00221802	Har_00221802	na
0.001046	0.0313246	1	7.11232	4.3362	3.42091	Har_00005304	Har_00005304	gi|156968293|gb|ABU98618.1|protease [Helicoverpa armigera]
0.001589	0.0394589	1	4.4221	4.89339	4.84825	Har_00003212	Har_00003212	gi|21218376|gb|AAM44056.1|AF511038_1midgut aminopeptidase N4 [Helicoverpa armigera]
0.000336	0.0178123	1	12.6003	11.5488	1.41642	Har_00109699	Har_00109699	gi|112983800|ref|NP_001037382.1|uricase [Bombyx mori] >gi|76156035|gb|ABA39861.1| uricase [Bombyx mori]
0.002421	0.0484172	1	10.4889	2.38961	4.07823	Har_00105001	Har_00105001	gi|170039413|ref|XP_001847529.1|alpha-amylase [Culex quinquefasciatus] >gi|167863006|gb|EDS26389.1| alpha-amylase [Culex quinquefasciatus]
0.000502	0.0219328	1	5.88019	3.5119	4.93785	Har_00092314	Har_00092314	gi|2970687|gb|AAC06038.1|beta-glucosidase precursor [Spodoptera frugiperda]
0.000297	0.0167879	1	4.52175	4.00366	5.61626	Har_00026509	Har_00026509	gi|116780454|gb|ABK21687.1|unknown [Picea sitchensis]
1e-06	0.00155931	1	3.73466	10.2901	2.63856	Har_00002781	Har_00002781	gi|2463058|emb|CAA72949.1|trypsin-like protease [Helicoverpa armigera]
0.001476	0.0376493	1	3.49867	29.4813	1.02311	Har_00043945	Har_00043945	gi|56462126|gb|AAV91346.1|cuticle protein 1 [Lonomia obliqua]
0.001803	0.0421135	1	5.5988	4.30907	4.13036	Har_00010868	Har_00010868	gi|171740897|gb|ACB54943.1|lipase [Helicoverpa armigera]
0.000429	0.020271	1	3.66687	4.5017	6.00548	Har_00177280	Har_00177280	gi|171740897|gb|ACB54943.1|lipase [Helicoverpa armigera]
0.00012	0.0112116	1	4.18675	5.34845	4.38464	Har_00035930	Har_00035930	gi|116780454|gb|ABK21687.1|unknown [Picea sitchensis]
4.9e-05	0.00748574	1	14.432	11.4845	1.69853	Har_00069639	Har_00069639	gi|112983800|ref|NP_001037382.1|uricase [Bombyx mori] >gi|76156035|gb|ABA39861.1| uricase [Bombyx mori]
0.000542	0.0227136	1	5.22334	25.7099	0.724687	Har_00037120	Har_00037120	gi|223671400|tpd|FAA00652.1|TPA: putative cuticle protein [Bombyx mori]
1.3e-05	0.004522	1	5.95839	5.63534	2.89406	Har_00116988	Har_00116988	gi|219487536|ref|XP_002240719.1|hypothetical protein BRAFLDRAFT_243365 [Branchiostoma floridae] >gi|210091566|gb|EEA39815.1| hypothetical protein BRAFLDRAFT_243365 [Branchiostoma floridae]
0.000149	0.0124084	1	5.41562	7.82957	2.27966	Har_00214266	Har_00214266	na
9.7e-05	0.00999166	1	6.43599	4.94203	2.98455	Har_00003078	Har_00003078	gi|41350251|gb|AAS00450.1|aminopeptidase N1 [Helicoverpa armigera]
0.000321	0.0174257	1	7.79715	4.80337	2.49588	Har_00018468	Har_00018468	gi|21311448|gb|AAM46727.1|AF453436_1azurocidin-like precursor protein [Trichoplusia ni]
3.6e-05	0.00684	1	5.00406	6.0773	3.05422	Har_00001994	Har_00001994	gi|156968309|gb|ABU98626.1|lipase-like protein [Helicoverpa armigera]
0.00109	0.0319527	1	10.6729	2.16118	4.0008	Har_00085009	Har_00085009	gi|156546367|ref|XP_001606773.1|PREDICTED: hypothetical protein [Nasonia vitripennis]
0.001332	0.0357678	1	3.49776	4.92359	5.31784	Har_00110132	Har_00110132	gi|151201030|gb|ABR88248.1|trypsin T5 [Heliothis virescens]
0.001286	0.035159	1	3.59217	5.64262	4.50393	Har_00063501	Har_00063501	gi|114052689|ref|NP_001040490.1|ecto-nucleotidase [Bombyx mori] >gi|95103108|gb|ABF51495.1| ecto-nucleotidase [Bombyx mori]
0.000262	0.0158603	1	4.7121	3.40657	5.57113	Har_00071381	Har_00071381	gi|194745867|ref|XP_001955406.1|GF16254 [Drosophila ananassae] >gi|190628443|gb|EDV43967.1| GF16254 [Drosophila ananassae]
0.000288	0.0165481	1	4.12662	5.25296	4.07181	Har_00003929	Har_00003929	gi|8347664|gb|AAF74746.1|AF261984_1trypsin precursor Hz42 [Helicoverpa zea]
0.000163	0.0127424	1	4.16362	5.30602	3.96808	Har_00081169	Har_00081169	gi|2463084|emb|CAA72962.1|trypsin-like protease [Helicoverpa armigera]
0.00117	0.033359	1	4.1886	4.28308	4.77535	Har_00031519	Har_00031519	gi|171740899|gb|ACB54944.1|lipase [Helicoverpa armigera]
4.7e-05	0.00737965	1	4.09183	6.7443	3.10127	Har_00061815	Har_00061815	gi|170036095|ref|XP_001845901.1|sodium-dependent phosphate transporter [Culex quinquefasciatus] >gi|167878592|gb|EDS41975.1| sodium-dependent phosphate transporter [Culex quinquefasciatus]
5e-06	0.00279136	1	6.42525	4.56892	2.9007	Har_00116987	Har_00116987	gi|219487536|ref|XP_002240719.1|hypothetical protein BRAFLDRAFT_243365 [Branchiostoma floridae] >gi|210091566|gb|EEA39815.1| hypothetical protein BRAFLDRAFT_243365 [Branchiostoma floridae]
0	0	1	5.4845	6.37926	2.42909	Har_00048040	Har_00048040	gi|153791757|ref|NP_001093275.1|myo-inositol oxygenase [Bombyx mori] >gi|95102966|gb|ABF51424.1| myo-inositol oxygenase [Bombyx mori]
5e-06	0.00279136	1	6.12644	5.59412	2.40834	Har_00025496	Har_00025496	gi|171740883|gb|ACB54936.1|chitin deacetylase [Helicoverpa armigera]
0.0008	0.0271388	1	5.84403	3.64367	3.84756	Har_00100778	Har_00100778	gi|2970687|gb|AAC06038.1|beta-glucosidase precursor [Spodoptera frugiperda]
0.001021	0.0310071	1	5.78569	2.64946	5.20349	Har_00114303	Har_00114303	gi|116788248|gb|ABK24806.1|unknown [Picea sitchensis]
6e-06	0.00301467	1	4.29432	3.1988	5.64557	Har_00070741	Har_00070741	gi|116780454|gb|ABK21687.1|unknown [Picea sitchensis]
0.000454	0.020741	1	7.4206	2.35156	4.39784	Har_00089504	Har_00089504	gi|170045018|ref|XP_001850121.1|peroxisomal N1-acetyl-spermine/spermidine oxidase [Culex quinquefasciatus] >gi|167868073|gb|EDS31456.1| peroxisomal N1-acetyl-spermine/spermidine oxidase [Culex quinquefasciatus]
5.5e-05	0.00787057	1	4.23781	7.02564	2.55276	Har_00029957	Har_00029957	na
0.001826	0.0425189	1	3.90237	3.34849	5.72994	Har_00084803	Har_00084803	gi|116780454|gb|ABK21687.1|unknown [Picea sitchensis]
0.000133	0.0117466	1	5.96335	3.73812	3.32821	Har_00003287	Har_00003287	gi|25814966|gb|AAN75693.1|midgut aminopeptidase APN1 [Helicoverpa armigera]
3e-06	0.00233897	1	6.11952	4.39327	2.74375	Har_00102518	Har_00102518	gi|112983744|ref|NP_001037311.1|mammalian sorbitol dehydrogenase homolog [Bombyx mori] >gi|399373|sp|Q02912.1|DHSO_BOMMO RecName: Full=Sorbitol dehydrogenase; AltName: Full=L-iditol 2-dehydrogenase >gi|217260|dbj|BAA02634.1| mammalian sorbitol dehydr
0.000829	0.0275642	1	5.03209	4.60342	3.16659	Har_00081038	Har_00081038	gi|171740903|gb|ACB54946.1|inactive lipase [Helicoverpa armigera]
0.000276	0.0163952	1	4.73434	3.46401	4.46136	Har_00101783	Har_00101783	gi|116780454|gb|ABK21687.1|unknown [Picea sitchensis]
2.2e-05	0.00595713	1	6.31403	4.64259	2.42301	Har_00118222	Har_00118222	gi|112983036|ref|NP_001037073.1|glucosidase [Bombyx mori] >gi|30142168|gb|AAP13852.1| glucosidase [Bombyx mori]
0.000156	0.0126102	1	4.47882	2.98852	5.24775	Har_00006444	Har_00006444	gi|116780454|gb|ABK21687.1|unknown [Picea sitchensis]
0.000749	0.0263666	1	4.25168	5.75542	2.85901	Har_00200037	Har_00200037	na
0.000394	0.0191371	1	4.1183	18.7097	0.903333	Har_00037121	Har_00037121	gi|223671400|tpd|FAA00652.1|TPA: putative cuticle protein [Bombyx mori]
0.001131	0.0326172	1	4.71027	6.15296	2.39584	Har_00119475	Har_00119475	gi|124802998|ref|XP_001347658.1|gene 11-1 protein precursor [Plasmodium falciparum 3D7] >gi|23495242|gb|AAN35571.1|AE014835_1 gene 11-1 protein precursor [Plasmodium falciparum 3D7]
0.000188	0.0135157	1	3.69554	7.51517	2.38702	Har_00005867	Har_00005867	gi|171740901|gb|ACB54945.1|azurocidin-like serine proteinase [Helicoverpa armigera]
0.002377	0.0481511	1	5.16231	5.44724	2.29941	Har_00010871	Har_00010871	gi|171740897|gb|ACB54943.1|lipase [Helicoverpa armigera]
0.000364	0.018557	1	3.35027	9.04707	2.10091	Har_00070218	Har_00070218	gi|156619504|gb|ABU88426.1|glutathione S-transferase GSTX01 [Helicoverpa armigera]
0.001102	0.0320224	1	4.225	4.23118	3.5352	Har_00002010	Har_00002010	gi|156968305|gb|ABU98624.1|protease [Helicoverpa armigera]
0.00033	0.0176599	1	3.2821	8.68168	2.15533	Har_00098534	Har_00098534	gi|157115782|ref|XP_001652694.1|hypothetical protein AaeL_AAEL007342 [Aedes aegypti] >gi|108876762|gb|EAT40987.1| conserved hypothetical protein [Aedes aegypti]
0.001246	0.0345458	1	8.03799	2.67841	2.80787	Har_00112200	Har_00112200	gi|195387213|ref|XP_002052293.1|maltase 1 [Drosophila virilis] >gi|194148750|gb|EDW64448.1| maltase 1 [Drosophila virilis]
0.001939	0.0435144	1	3.69808	3.49922	4.60519	Har_00003249	Har_00003249	gi|27818925|gb|AAO23562.1|aminopeptidase N4 [Helicoverpa armigera]
0.000255	0.0156037	1	3.56496	7.28887	2.26584	Har_00108688	Har_00108688	gi|171740901|gb|ACB54945.1|azurocidin-like serine proteinase [Helicoverpa armigera]
0.000731	0.0260898	1	3.71373	3.48059	4.54525	Har_00177281	Har_00177281	gi|171740897|gb|ACB54943.1|lipase [Helicoverpa armigera]
0.001317	0.0357043	1	4.90692	20.4636	1.72068	Har_00045764	Har_00045764	gi|183979394|dbj|BAG30749.1|cuticular protein CPR59A [Papilio xuthus]
0.001062	0.0314909	1	3.40963	7.06397	2.38837	Har_00055990	Har_00055990	gi|146345325|gb|ABQ23674.1|very high density lipoprotein [Helicoverpa zea]
3e-06	0.00233897	1	5.66966	3.73589	2.698	Har_00076374	Har_00076374	gi|2970687|gb|AAC06038.1|beta-glucosidase precursor [Spodoptera frugiperda]
0.00076	0.026477	1	3.34364	4.76518	3.44731	Har_00025108	Har_00025108	gi|2463056|emb|CAA72948.1|trypsin-like protease [Helicoverpa armigera]
7e-06	0.00329729	1	4.67404	3.00931	3.88373	Har_00105176	Har_00105176	gi|170048013|ref|XP_001851495.1|zinc carboxypeptidase A 1 [Culex quinquefasciatus] >gi|167870246|gb|EDS33629.1| zinc carboxypeptidase A 1 [Culex quinquefasciatus]
0.000574	0.0233785	1	3.74909	4.1112	3.54108	Har_00094106	Har_00094106	gi|215262118|emb|CAR92522.1|putative dsRNase [Spodoptera littoralis]
0.000701	0.0256417	1	3.19734	5.10563	3.32356	Har_00034786	Har_00034786	gi|2463056|emb|CAA72948.1|trypsin-like protease [Helicoverpa armigera]
0.000754	0.0264191	1	3.66382	4.82925	3.01421	Har_00003939	Har_00003939	gi|8347660|gb|AAF74744.1|AF261982_1trypsin precursor Hz1 [Helicoverpa zea]
0.000147	0.0123327	1	3.55834	3.73754	3.99598	Har_00067342	Har_00067342	gi|157123534|ref|XP_001660190.1|niemann-pick C1 [Aedes aegypti] >gi|108874358|gb|EAT38583.1| niemann-pick C1 [Aedes aegypti]
0.000136	0.0119416	1	3.34088	4.32353	3.67682	Har_00002789	Har_00002789	gi|2463056|emb|CAA72948.1|trypsin-like protease [Helicoverpa armigera]
0.000103	0.0101574	1	5.8647	3.08846	2.91307	Har_00070664	Har_00070664	gi|112983036|ref|NP_001037073.1|glucosidase [Bombyx mori] >gi|30142168|gb|AAP13852.1| glucosidase [Bombyx mori]
0.000716	0.0258606	1	4.29727	4.07873	3.00518	Har_00003906	Har_00003906	gi|8347672|gb|AAF74750.1|AF261988_1putative trypsin precursor Hz3 [Helicoverpa zea]
0.000223	0.0144471	1	3.70473	4.45844	3.17382	Har_00003946	Har_00003946	gi|8347658|gb|AAF74743.1|AF261981_1trypsin precursor Hz8 [Helicoverpa zea]
0.000421	0.0200185	1	3.59667	3.93723	3.69519	Har_00002717	Har_00002717	gi|2463084|emb|CAA72962.1|trypsin-like protease [Helicoverpa armigera]
0.002032	0.0444974	1	3.84785	3.57151	3.79458	Har_00039565	Har_00039565	gi|170027758|ref|XP_001841764.1|conserved hypothetical protein [Culex quinquefasciatus] >gi|167862334|gb|EDS25717.1| conserved hypothetical protein [Culex quinquefasciatus]
0.001877	0.0429544	1	2.79127	3.08455	5.7742	Har_00101828	Har_00101828	gi|171740897|gb|ACB54943.1|lipase [Helicoverpa armigera]
0.00178	0.0418356	1	3.75267	5.176	2.53991	Har_00087854	Har_00087854	gi|116792188|gb|ABK26266.1|unknown [Picea sitchensis]
0	0	1	4.40537	4.98458	2.23699	Har_00107463	Har_00107463	gi|171740901|gb|ACB54945.1|azurocidin-like serine proteinase [Helicoverpa armigera]
0.001111	0.0321635	1	3.46266	3.78032	3.7152	Har_00114865	Har_00114865	gi|215262118|emb|CAR92522.1|putative dsRNase [Spodoptera littoralis]
7.8e-05	0.00909062	1	3.50763	4.1746	3.27313	Har_00011784	Har_00011784	gi|151199952|gb|ABR88233.1|chymotrypsin-like protease C3 [Heliothis virescens]
0.002175	0.0460884	1	3.42242	3.9707	3.49706	Har_00091667	Har_00091667	gi|126009703|gb|ABN64103.1|midgut aminopeptidase N5 [Helicoverpa armigera]
0.001308	0.0355883	1	3.13419	5.74188	2.61965	Har_00075346	Har_00075346	gi|171740901|gb|ACB54945.1|azurocidin-like serine proteinase [Helicoverpa armigera]
0.001862	0.0429464	1	3.7178	4.08589	3.01369	Har_00003911	Har_00003911	gi|8347670|gb|AAF74749.1|AF261987_1putative trypsin precursor Hz2 [Helicoverpa zea]
0.000663	0.0250049	1	3.05334	5.07071	2.94255	Har_00051748	Har_00051748	gi|215262118|emb|CAR92522.1|putative dsRNase [Spodoptera littoralis]
0.001428	0.0370524	1	3.5353	4.43319	2.89924	Har_00200251	Har_00200251	na
4.2e-05	0.00722144	1	3.26117	5.83147	2.30489	Har_00045943	Har_00045943	na
0.000327	0.0175736	1	3.05499	4.7563	2.93923	Har_00002755	Har_00002755	gi|2463068|emb|CAA72954.1|trypsin-like protease [Helicoverpa armigera]
4e-06	0.00254761	1	5.93266	3.05072	2.35633	Har_00118223	Har_00118223	gi|112983036|ref|NP_001037073.1|glucosidase [Bombyx mori] >gi|30142168|gb|AAP13852.1| glucosidase [Bombyx mori]
0.000613	0.0239999	1	2.88367	5.429	2.72142	Har_00001850	Har_00001850	gi|171740901|gb|ACB54945.1|azurocidin-like serine proteinase [Helicoverpa armigera]
3e-06	0.00233897	1	6.04642	3.27501	2.12565	Har_00084553	Har_00084553	gi|148908687|gb|ABR17451.1|unknown [Picea sitchensis]
0.00074	0.0262602	1	4.32719	2.76461	3.45363	Har_00105173	Har_00105173	gi|170048013|ref|XP_001851495.1|zinc carboxypeptidase A 1 [Culex quinquefasciatus] >gi|167870246|gb|EDS33629.1| zinc carboxypeptidase A 1 [Culex quinquefasciatus]
8.1e-05	0.00927296	1	4.96265	3.90982	2.1155	Har_00001911	Har_00001911	gi|171740883|gb|ACB54936.1|chitin deacetylase [Helicoverpa armigera]
3e-06	0.00233897	1	5.07701	12.0104	1.52328	Har_00111905	Har_00111905	gi|171740921|gb|ACB54955.1|insect intestinal mucin 4 [Helicoverpa armigera]
4.6e-05	0.00737965	1	3.62983	4.76614	2.30357	Har_00080247	Har_00080247	gi|15212557|gb|AAK85539.1|aminopeptidase N [Helicoverpa armigera]
0.000206	0.0138415	1	2.89696	4.97312	2.62553	Har_00042824	Har_00042824	gi|156619504|gb|ABU88426.1|glutathione S-transferase GSTX01 [Helicoverpa armigera]
0.000302	0.016874	1	7.28728	5.27434	1.02068	Har_00038787	Har_00038787	gi|111550264|gb|ABH10141.1|HMG176 [Helicoverpa armigera] >gi|116833119|gb|ABK29472.1| HMG176 [Helicoverpa armigera]
0.000289	0.0165788	1	3.45973	2.90545	3.72389	Har_00013823	Har_00013823	gi|116780454|gb|ABK21687.1|unknown [Picea sitchensis]
0.000441	0.0205165	1	4.41118	2.54471	3.27292	Har_00016034	Har_00016034	gi|15212555|gb|AAK85538.1|aminopeptidase N [Helicoverpa armigera]
3e-06	0.00233897	1	5.45202	3.16727	2.12468	Har_00048041	Har_00048041	gi|153791757|ref|NP_001093275.1|myo-inositol oxygenase [Bombyx mori] >gi|95102966|gb|ABF51424.1| myo-inositol oxygenase [Bombyx mori]
0.000459	0.0208638	1	5.96444	2.00352	3.05021	Har_00070662	Har_00070662	gi|112983036|ref|NP_001037073.1|glucosidase [Bombyx mori] >gi|30142168|gb|AAP13852.1| glucosidase [Bombyx mori]
9.3e-05	0.00994199	1	4.76684	3.45832	2.19043	Har_00025497	Har_00025497	gi|171740883|gb|ACB54936.1|chitin deacetylase [Helicoverpa armigera]
0.002412	0.0484172	1	2.50507	3.45573	4.05454	Har_00101392	Har_00101392	gi|171740897|gb|ACB54943.1|lipase [Helicoverpa armigera]
0.000362	0.0184968	1	5.45278	2.49559	2.57643	Har_00119861	Har_00119861	gi|91084833|ref|XP_966469.1|PREDICTED: similar to myoinositol oxygenase [Tribolium castaneum]
0.000121	0.0112354	1	4.80304	3.21162	2.18423	Har_00102521	Har_00102521	gi|112983744|ref|NP_001037311.1|mammalian sorbitol dehydrogenase homolog [Bombyx mori] >gi|399373|sp|Q02912.1|DHSO_BOMMO RecName: Full=Sorbitol dehydrogenase; AltName: Full=L-iditol 2-dehydrogenase >gi|217260|dbj|BAA02634.1| mammalian sorbitol dehydr
0.000888	0.0287558	1	2.50722	4.88177	2.75173	Har_00120427	Har_00120427	na
0.000148	0.0123707	1	7.80225	4.61701	0.933279	Har_00036656	Har_00036656	gi|111550264|gb|ABH10141.1|HMG176 [Helicoverpa armigera] >gi|116833119|gb|ABK29472.1| HMG176 [Helicoverpa armigera]
2.9e-05	0.00633517	1	4.5215	3.0626	2.41045	Har_00008687	Har_00008687	gi|112983744|ref|NP_001037311.1|mammalian sorbitol dehydrogenase homolog [Bombyx mori] >gi|399373|sp|Q02912.1|DHSO_BOMMO RecName: Full=Sorbitol dehydrogenase; AltName: Full=L-iditol 2-dehydrogenase >gi|217260|dbj|BAA02634.1| mammalian sorbitol dehydr
0.000164	0.0127424	1	8.54826	4.51364	0.850062	Har_00232721	Har_00232721	na
0.000677	0.0252417	1	19.1396	4.28196	0.400115	Har_00071762	Har_00071762	gi|111550264|gb|ABH10141.1|HMG176 [Helicoverpa armigera] >gi|116833119|gb|ABK29472.1| HMG176 [Helicoverpa armigera]
0.000844	0.0278378	1	2.46336	4.848	2.70667	Har_00040030	Har_00040030	gi|205318605|gb|ACI02333.1|antibacterial protein [Heliothis virescens]
0.00046	0.0208638	1	17.5205	4.67436	0.390014	Har_00001708	Har_00001708	gi|111550264|gb|ABH10141.1|HMG176 [Helicoverpa armigera] >gi|116833119|gb|ABK29472.1| HMG176 [Helicoverpa armigera]
0.000585	0.0234935	1	3.79088	10.5888	1.25901	Har_00074842	Har_00074842	gi|183979317|dbj|BAG30753.1|putative cuticular protein [Papilio xuthus]
0.001486	0.0377511	1	2.7698	4.56419	2.51919	Har_00002784	Har_00002784	gi|2463058|emb|CAA72949.1|trypsin-like protease [Helicoverpa armigera]
0.000767	0.0266388	1	4.93732	3.06421	2.1025	Har_00084211	Har_00084211	gi|148908687|gb|ABR17451.1|unknown [Picea sitchensis]
0.001625	0.0398711	1	2.44369	16.517	0.785515	Har_00099654	Har_00099654	gi|156548282|ref|XP_001605843.1|PREDICTED: similar to LD23157p [Nasonia vitripennis]
2.6e-05	0.00609181	1	3.75689	3.29176	2.51495	Har_00092927	Har_00092927	gi|2970687|gb|AAC06038.1|beta-glucosidase precursor [Spodoptera frugiperda]
0.00016	0.0126269	1	9.24094	4.80285	1.43071	Har_00036654	Har_00036654	gi|111550264|gb|ABH10141.1|HMG176 [Helicoverpa armigera] >gi|116833119|gb|ABK29472.1| HMG176 [Helicoverpa armigera]
0.00149	0.037789	1	3.27149	3.07409	2.96281	Har_00061817	Har_00061817	gi|170036095|ref|XP_001845901.1|sodium-dependent phosphate transporter [Culex quinquefasciatus] >gi|167878592|gb|EDS41975.1| sodium-dependent phosphate transporter [Culex quinquefasciatus]
2.2e-05	0.00595713	1	3.53694	11.5874	1.37989	Har_00001787	Har_00001787	gi|171740921|gb|ACB54955.1|insect intestinal mucin 4 [Helicoverpa armigera]
0.000691	0.0254662	1	22.3647	3.1285	0.416088	Har_00001698	Har_00001698	gi|111550264|gb|ABH10141.1|HMG176 [Helicoverpa armigera] >gi|116833119|gb|ABK29472.1| HMG176 [Helicoverpa armigera]
0.000696	0.0256087	1	3.68213	3.25833	2.39151	Har_00097961	Har_00097961	gi|170028327|ref|XP_001842047.1|homogentisate 1,2-dioxygenase [Culex quinquefasciatus] >gi|167874202|gb|EDS37585.1| homogentisate 1,2-dioxygenase [Culex quinquefasciatus]
0.001595	0.0394994	1	2.33244	5.88985	2.08481	Har_00001848	Har_00001848	gi|171740901|gb|ACB54945.1|azurocidin-like serine proteinase [Helicoverpa armigera]
0.0002	0.0137656	1	7.32323	3.98108	1.01989	Har_00039839	Har_00039839	gi|111550264|gb|ABH10141.1|HMG176 [Helicoverpa armigera] >gi|116833119|gb|ABK29472.1| HMG176 [Helicoverpa armigera]
2.1e-05	0.00582589	1	4.1009	2.85587	2.4401	Har_00102439	Har_00102439	gi|2970687|gb|AAC06038.1|beta-glucosidase precursor [Spodoptera frugiperda]
0.000519	0.0222668	1	2.38194	4.01719	2.98506	Har_00108436	Har_00108436	gi|8037814|gb|AAF71515.1|AF233728_1AiC2 chymotrypsinogen [Agrotis ipsilon]
2e-06	0.00210326	1	4.46461	2.85875	2.1873	Har_00065185	Har_00065185	gi|195155513|ref|XP_002018648.1|GL25909 [Drosophila persimilis] >gi|194114801|gb|EDW36844.1| GL25909 [Drosophila persimilis]
0.000963	0.0301154	1	2.49203	4.81805	2.30306	Har_00045944	Har_00045944	na
9.7e-05	0.00999166	1	3.32375	2.75564	2.93122	Har_00006952	Har_00006952	na
0.000536	0.02261	1	3.91381	3.38948	2.00747	Har_00049103	Har_00049103	gi|171740883|gb|ACB54936.1|chitin deacetylase [Helicoverpa armigera]
0.000421	0.0200185	1	14.9155	4.28018	0.415702	Har_00071761	Har_00071761	gi|111550264|gb|ABH10141.1|HMG176 [Helicoverpa armigera] >gi|116833119|gb|ABK29472.1| HMG176 [Helicoverpa armigera]
0.001518	0.0382418	1	2.90357	11.3294	0.804894	Har_00063353	Har_00063353	gi|13236828|gb|AAK14793.1|sensory appendage protein-like protein [Mamestra brassicae]
0.000678	0.0252417	1	18.7056	3.74974	0.373182	Har_00056752	Har_00056752	gi|111550264|gb|ABH10141.1|HMG176 [Helicoverpa armigera] >gi|116833119|gb|ABK29472.1| HMG176 [Helicoverpa armigera]
0.00221	0.0463301	1	3.50571	2.15699	3.43436	Har_00016032	Har_00016032	gi|15212555|gb|AAK85538.1|aminopeptidase N [Helicoverpa armigera]
0.000326	0.0175706	1	2.83382	4.42571	2.04724	Har_00002324	Har_00002324	gi|145843824|gb|ABP96919.1|serine protease 6 [Helicoverpa armigera]
0.000789	0.0270021	1	2.53272	3.14714	3.21433	Har_00003925	Har_00003925	gi|8347664|gb|AAF74746.1|AF261984_1trypsin precursor Hz42 [Helicoverpa zea]
0.00162	0.03977	1	2.36259	4.40626	2.46091	Har_00120428	Har_00120428	na
0.001834	0.0426174	1	3.5875	2.12659	3.30741	Har_00114305	Har_00114305	gi|116788248|gb|ABK24806.1|unknown [Picea sitchensis]
0.001697	0.04084	1	4.54135	2.59645	2.08263	Har_00073019	Har_00073019	gi|186909546|gb|ACC94296.1|glucose oxidase-like enzyme [Helicoverpa armigera]
0.00069	0.0254662	1	2.59672	3.0614	3.00178	Har_00002331	Har_00002331	gi|2463060|emb|CAA72950.1|trypsin-like protease [Helicoverpa armigera] >gi|145843822|gb|ABP96918.1| serine protease 5 [Helicoverpa armigera]
0.002493	0.0490555	1	4.24429	9.90955	1.76328	Har_00053589	Har_00053589	gi|95103060|gb|ABF51471.1|mitochondrial phosphoenolpyruvate carboxykinase isoform 4 [Bombyx mori]
0.001812	0.0422582	1	2.54513	3.24323	2.8892	Har_00002787	Har_00002787	gi|2463056|emb|CAA72948.1|trypsin-like protease [Helicoverpa armigera]
0.001576	0.0392654	1	3.93255	1.72931	10.4816	Har_00081097	Har_00081097	gi|195024823|ref|XP_001985943.1|GH20813 [Drosophila grimshawi] >gi|193901943|gb|EDW00810.1| GH20813 [Drosophila grimshawi]
0.002296	0.0473007	1	3.07719	10.0526	1.311	Har_00045763	Har_00045763	gi|183979394|dbj|BAG30749.1|cuticular protein CPR59A [Papilio xuthus]
0.001595	0.0394994	1	2.20927	2.04978	5.10611	Har_00047639	Har_00047639	gi|195430358|ref|XP_002063223.1|GK21810 [Drosophila willistoni] >gi|194159308|gb|EDW74209.1| GK21810 [Drosophila willistoni]
0.001077	0.031828	1	2.49241	3.09427	2.92365	Har_00075799	Har_00075799	gi|151199970|gb|ABR88242.1|trypsin T2a [Heliothis virescens] >gi|151201022|gb|ABR88244.1| trypsin T2c [Heliothis virescens]
0.000318	0.0173044	1	2.81875	3.34391	2.35107	Har_00044701	Har_00044701	gi|171740901|gb|ACB54945.1|azurocidin-like serine proteinase [Helicoverpa armigera]
0.001012	0.0309625	1	4.09967	1.4741	7.80815	Har_00039581	Har_00039581	gi|2970687|gb|AAC06038.1|beta-glucosidase precursor [Spodoptera frugiperda]
0.000393	0.0191091	1	18.2445	4.54109	0.261343	Har_00056753	Har_00056753	gi|111550264|gb|ABH10141.1|HMG176 [Helicoverpa armigera] >gi|116833119|gb|ABK29472.1| HMG176 [Helicoverpa armigera]
0.000145	0.0121875	1	2.62414	3.11597	2.64323	Har_00044700	Har_00044700	gi|171740901|gb|ACB54945.1|azurocidin-like serine proteinase [Helicoverpa armigera]
0.000164	0.0127424	1	2.84042	2.89686	2.6244	Har_00061136	Har_00061136	gi|170036095|ref|XP_001845901.1|sodium-dependent phosphate transporter [Culex quinquefasciatus] >gi|167878592|gb|EDS41975.1| sodium-dependent phosphate transporter [Culex quinquefasciatus]
6.4e-05	0.00837407	1	2.45421	16.8375	1.93127	Har_00232079	Har_00232079	na
0.000433	0.0203749	1	2.48951	2.98409	2.87693	Har_00081171	Har_00081171	gi|2463084|emb|CAA72962.1|trypsin-like protease [Helicoverpa armigera]
0.000444	0.0205714	1	2.93864	8.91057	1.22711	Har_00082622	Har_00082622	gi|46486477|gb|AAS98675.1|pupal cuticle protein [Manduca sexta]
0.000716	0.0258606	1	3.00166	1.07301	7.49834	Har_00017555	Har_00017555	gi|148908323|gb|ABR17275.1|unknown [Picea sitchensis]
0.001743	0.0414616	1	2.62737	3.09472	2.55616	Har_00002713	Har_00002713	gi|2463084|emb|CAA72962.1|trypsin-like protease [Helicoverpa armigera]
0.000976	0.0304377	1	3.66956	2.30368	2.43844	Har_00101526	Har_00101526	gi|146572918|gb|ABQ42338.1|carboxylesterase [Helicoverpa armigera]
0.000195	0.01365	1	3.54545	2.50436	2.31998	Har_00033121	Har_00033121	gi|184161312|gb|ACC68683.1|aminopeptidase N [Helicoverpa armigera]
0.001635	0.0399215	1	2.62948	2.86904	2.69004	Har_00025111	Har_00025111	gi|2463056|emb|CAA72948.1|trypsin-like protease [Helicoverpa armigera]
0.001	0.0307927	1	4.94856	1.76995	6.96003	Har_00116521	Har_00116521	gi|2970687|gb|AAC06038.1|beta-glucosidase precursor [Spodoptera frugiperda]
0.001442	0.0372187	1	2.30537	2.93744	2.84532	Har_00002735	Har_00002735	gi|2463056|emb|CAA72948.1|trypsin-like protease [Helicoverpa armigera]
0.001433	0.0371348	1	1.24973	7.56946	3.06601	Har_00018037	Har_00018037	na
2e-06	0.00210326	1	5.62191	5.52119	1.68545	Har_00032469	Har_00032469	gi|116833105|gb|ABK29465.1|trypsinogen Y precursor [Helicoverpa armigera]
0.002163	0.0460275	1	2.47209	2.84012	2.5751	Har_00003934	Har_00003934	gi|8347662|gb|AAF74745.1|AF261983_1trypsin precursor Hz11 [Helicoverpa zea]
0.001382	0.0365462	1	13.0945	2.99294	0.4602	Har_00001696	Har_00001696	gi|111550264|gb|ABH10141.1|HMG176 [Helicoverpa armigera] >gi|116833119|gb|ABK29472.1| HMG176 [Helicoverpa armigera]
7.5e-05	0.00899602	1	5.21736	6.24296	1.8242	Har_00109406	Har_00109406	gi|196121924|gb|ACG69475.1|astacin [Spodoptera frugiperda]
0.000149	0.0124084	1	2.54006	3.43714	2.01803	Har_00117655	Har_00117655	gi|2970687|gb|AAC06038.1|beta-glucosidase precursor [Spodoptera frugiperda]
2e-06	0.00210326	1	5.49458	5.58838	1.80936	Har_00078765	Har_00078765	gi|21311448|gb|AAM46727.1|AF453436_1azurocidin-like precursor protein [Trichoplusia ni]
9e-06	0.00383943	1	5.36326	5.11353	1.64706	Har_00018470	Har_00018470	gi|21311448|gb|AAM46727.1|AF453436_1azurocidin-like precursor protein [Trichoplusia ni]
4.1e-05	0.00715838	1	3.13993	7.324	1.39218	Har_00186205	Har_00186205	na
0.000548	0.0227136	1	5.20127	1.57206	4.9893	Har_00008742	Har_00008742	gi|160358393|ref|NP_001104007.1|cytochrome P450 [Bombyx mori] >gi|147575217|gb|ABQ45551.1| cytochrome P450 [Bombyx mori]
0.001554	0.0389102	1	2.76094	0.637829	9.00653	Har_00017036	Har_00017036	gi|148908323|gb|ABR17275.1|unknown [Picea sitchensis]
0.000234	0.0148408	1	4.29212	1.28054	4.66162	Har_00107691	Har_00107691	gi|156553608|ref|XP_001599867.1|PREDICTED: similar to elongase, putative [Nasonia vitripennis]
1.2e-05	0.00444787	1	4.9873	5.23932	1.69157	Har_00063917	Har_00063917	gi|156968289|gb|ABU98616.1|chitin binding PM protein [Helicoverpa armigera]
4e-06	0.00254761	1	5.25114	5.75366	1.9659	Har_00101454	Har_00101454	gi|116833105|gb|ABK29465.1|trypsinogen Y precursor [Helicoverpa armigera]
0.000441	0.0205165	1	2.08101	7.65648	1.0569	Har_00047096	Har_00047096	gi|112982855|ref|NP_001037570.1|ribosomal protein S15A [Bombyx mori] >gi|54609315|gb|AAV34873.1| ribosomal protein S15A [Bombyx mori]
0.001393	0.0366279	1	2.09189	2.4796	2.88696	Har_00055983	Har_00055983	gi|156371249|ref|XP_001628677.1|predicted protein [Nematostella vectensis] >gi|156215660|gb|EDO36614.1| predicted protein [Nematostella vectensis]
2e-06	0.00210326	1	4.82266	4.81772	1.555	Har_00001731	Har_00001731	gi|116833105|gb|ABK29465.1|trypsinogen Y precursor [Helicoverpa armigera]
0.00195	0.0436314	1	6.36197	1.42935	3.13033	Har_00086500	Har_00086500	gi|67906823|gb|AAR98920.2|trypsin-like proteinase T2a precursor [Ostrinia nubilalis]
6.2e-05	0.008246	1	4.7202	5.64412	1.94298	Har_00071082	Har_00071082	gi|114052488|ref|NP_001040507.1|alcohol dehydrogenase [Bombyx mori] >gi|95104529|gb|ABF51211.1| alcohol dehydrogenase [Bombyx mori]
3.4e-05	0.00676368	1	2.20641	7.96839	0.765784	Har_00032852	Har_00032852	gi|91088493|ref|XP_975965.1|PREDICTED: similar to CG3625 CG3625-PB isoform 2 [Tribolium castaneum]
0.002573	0.0498505	1	2.0492	2.39225	2.73972	Har_00003932	Har_00003932	gi|8347662|gb|AAF74745.1|AF261983_1trypsin precursor Hz11 [Helicoverpa zea]
0	0	1	5.19146	4.23934	1.64085	Har_00078766	Har_00078766	gi|21311448|gb|AAM46727.1|AF453436_1azurocidin-like precursor protein [Trichoplusia ni]
0.000124	0.0113278	1	1.03753	0.593405	23.1818	Har_00001571	Har_00001571	gi|116833203|gb|ABK29514.1|ecdysteroid-regulated protein [Helicoverpa armigera]
0.000192	0.013566	1	2.84057	9.18936	1.96973	Har_00012125	Har_00012125	gi|157115780|ref|XP_001652693.1|hypothetical protein AaeL_AAEL007344 [Aedes aegypti] >gi|108876761|gb|EAT40986.1| conserved hypothetical protein [Aedes aegypti]
0.001216	0.0339639	1	2.01626	7.87408	1.20416	Har_00189431	Har_00189431	na
2.9e-05	0.00633517	1	3.16778	5.43813	0.754556	Har_00045004	Har_00045004	gi|111550264|gb|ABH10141.1|HMG176 [Helicoverpa armigera] >gi|116833119|gb|ABK29472.1| HMG176 [Helicoverpa armigera]
0.000145	0.0121875	1	2.52645	7.76269	1.51726	Har_00023472	Har_00023472	gi|156619504|gb|ABU88426.1|glutathione S-transferase GSTX01 [Helicoverpa armigera]
9.6e-05	0.00999166	1	2.83352	5.89829	1.35839	Har_00019783	Har_00019783	gi|114052392|ref|NP_001040509.1|S-adenosylmethionine synthetase [Bombyx mori] >gi|95102576|gb|ABF51226.1| S-adenosylmethionine synthetase [Bombyx mori]
0.000124	0.0113278	1	2.26382	8.50108	1.59913	Har_00002155	Har_00002155	gi|156619504|gb|ABU88426.1|glutathione S-transferase GSTX01 [Helicoverpa armigera]
0.000307	0.0169921	1	2.74335	5.71875	0.765344	Har_00082366	Har_00082366	gi|114050837|ref|NP_001040409.1|eukaryotic translation initiation factor 4E-binding protein 2 [Bombyx mori] >gi|95102784|gb|ABF51333.1| eukaryotic translation initiation factor 4E-binding protein 2 [Bombyx mori]
9.3e-05	0.00994199	1	2.24807	2.62701	2.01031	Har_00024829	Har_00024829	gi|156541395|ref|XP_001600529.1|PREDICTED: similar to ENSANGP00000012910 [Nasonia vitripennis]
7e-05	0.00872011	1	4.93546	4.51046	1.89057	Har_00001913	Har_00001913	gi|171740883|gb|ACB54936.1|chitin deacetylase [Helicoverpa armigera]
3.3e-05	0.00676368	1	3.55219	3.90876	1.19437	Har_00173662	Har_00173662	na
9.2e-05	0.00990533	1	2.31054	2.42731	2.06973	Har_00081077	Har_00081077	na
0.001833	0.0426174	1	2.09247	5.66661	1.02248	Har_00023348	Har_00023348	gi|223671256|tpd|FAA00580.1|TPA: putative cuticle protein [Bombyx mori]
2.3e-05	0.00601191	1	4.9654	3.91972	1.67907	Har_00101452	Har_00101452	gi|116833105|gb|ABK29465.1|trypsinogen Y precursor [Helicoverpa armigera]
0.001368	0.0363247	1	2.12285	5.36155	0.998539	Har_00119846	Har_00119846	gi|170574377|ref|XP_001892787.1|Animal haem peroxidase family protein [Brugia malayi] >gi|158601474|gb|EDP38379.1| Animal haem peroxidase family protein [Brugia malayi]
0.000502	0.0219328	1	2.01827	6.20143	1.11942	Har_00075251	Har_00075251	gi|54609197|gb|AAV34814.1|ribosomal protein L5 [Bombyx mori]
0.000195	0.01365	1	3.97523	2.76669	1.01061	Har_00120536	Har_00120536	gi|218505759|ref|NP_001136225.1|hypothetical protein LOC100216500 [Bombyx mori] >gi|215435078|gb|ACJ66918.1| hypothetical protein 39 [Bombyx mori]
3.6e-05	0.00684	1	3.65224	4.55058	1.53593	Har_00090503	Har_00090503	gi|171740913|gb|ACB54951.1|polycalin [Helicoverpa armigera]
0.001304	0.0355436	1	4.39897	1.74485	4.28215	Har_00080737	Har_00080737	gi|2970687|gb|AAC06038.1|beta-glucosidase precursor [Spodoptera frugiperda]
0.000262	0.0158603	1	2.00351	5.63053	0.946805	Har_00032902	Har_00032902	gi|49036475|sp|Q962S0.1|RS7_SPOFRRecName: Full=40S ribosomal protein S7 >gi|15213806|gb|AAK92178.1|AF400206_1 ribosomal protein S7 [Spodoptera frugiperda]
6.2e-05	0.008246	1	2.28359	10.8589	0.430666	Har_00058096	Har_00058096	na
0.002185	0.0461472	1	2.75679	1.08949	4.13263	Har_00018844	Har_00018844	gi|158289060|ref|XP_310845.4|AGAP000275-PA [Anopheles gambiae str. PEST] >gi|157018872|gb|EAA06477.5| AGAP000275-PA [Anopheles gambiae str. PEST]
0.000231	0.0147124	1	4.03692	3.63535	1.41693	Har_00070355	Har_00070355	gi|116326818|ref|YP_803355.1|hypothetical protein TNAV2c_gp132 [Trichoplusia ni ascovirus 2c] >gi|102231826|gb|ABF70649.1| hypothetical protein [Trichoplusia ni ascovirus 2c]
0.000145	0.0121875	1	2.09565	5.53747	1.13435	Har_00047572	Har_00047572	gi|91078412|ref|XP_974620.1|PREDICTED: similar to CG14235 CG14235-PA [Tribolium castaneum]
0.001926	0.0433518	1	3.28135	1.31037	4.06126	Har_00008741	Har_00008741	gi|160358393|ref|NP_001104007.1|cytochrome P450 [Bombyx mori] >gi|147575217|gb|ABQ45551.1| cytochrome P450 [Bombyx mori]
1.6e-05	0.0049219	1	2.75918	3.74659	1.03978	Har_00111939	Har_00111939	gi|183979372|dbj|BAG30738.1|troponin T [Papilio xuthus]
0.000454	0.020741	1	2.6693	5.70122	1.53144	Har_00001894	Har_00001894	gi|171740889|gb|ACB54939.1|trypsin [Helicoverpa armigera]
0.002163	0.0460275	1	2.69617	0.782086	4.70044	Har_00071387	Har_00071387	gi|194745867|ref|XP_001955406.1|GF16254 [Drosophila ananassae] >gi|190628443|gb|EDV43967.1| GF16254 [Drosophila ananassae]
0.000127	0.0115302	1	2.64526	5.4564	1.47003	Har_00070919	Har_00070919	gi|114052392|ref|NP_001040509.1|S-adenosylmethionine synthetase [Bombyx mori] >gi|95102576|gb|ABF51226.1| S-adenosylmethionine synthetase [Bombyx mori]
1.2e-05	0.00444787	1	3.4997	5.20074	1.88222	Har_00002400	Har_00002400	gi|15212557|gb|AAK85539.1|aminopeptidase N [Helicoverpa armigera]
1.4e-05	0.00462102	1	4.38484	2.2564	1.02948	Har_00117745	Har_00117745	gi|114051590|ref|NP_001040355.1|cellular retinaldehyde-binding protein [Bombyx mori] >gi|95102616|gb|ABF51246.1| cellular retinaldehyde-binding protein [Bombyx mori]
0.002335	0.0477095	1	2.04334	6.8651	1.46948	Har_00102087	Har_00102087	gi|148298782|ref|NP_001091747.1|C-type lectin [Bombyx mori] >gi|114796717|gb|ABI79325.1| C-type lectin [Bombyx mori]
0.002277	0.0471456	1	1.34549	5.84347	2.16169	Har_00061497	Har_00061497	gi|2463064|emb|CAA72952.1|chymotrypsin-like protease [Helicoverpa armigera]
0.000169	0.0129309	1	2.5903	5.23353	1.4544	Har_00008470	Har_00008470	gi|223671000|tpd|FAA00451.1|TPA: putative cuticle protein [Bombyx mori]
0.001219	0.0339847	1	3.11223	4.60158	1.53697	Har_00004520	Har_00004520	gi|157128613|ref|XP_001655155.1|hypothetical protein AaeL_AAEL002406 [Aedes aegypti] >gi|108882219|gb|EAT46444.1| conserved hypothetical protein [Aedes aegypti]
8.8e-05	0.00972121	1	2.21712	4.06305	0.997107	Har_00057761	Har_00057761	gi|116780369|gb|ABK21653.1|unknown [Picea sitchensis]
0.001195	0.0337948	1	4.34266	2.74573	1.33585	Har_00024280	Har_00024280	gi|116326818|ref|YP_803355.1|hypothetical protein TNAV2c_gp132 [Trichoplusia ni ascovirus 2c] >gi|102231826|gb|ABF70649.1| hypothetical protein [Trichoplusia ni ascovirus 2c]
0.000589	0.0235288	1	2.30936	5.47946	1.45072	Har_00031839	Har_00031839	gi|116780369|gb|ABK21653.1|unknown [Picea sitchensis]
0.002452	0.0486527	1	2.21333	6.49145	1.69357	Har_00122394	Har_00122394	na
0	0	1	3.80091	3.25747	1.4614	Har_00069541	Har_00069541	gi|223671384|tpd|FAA00644.1|TPA: putative cuticle protein [Bombyx mori]
0.001551	0.0388782	1	2.04924	5.35743	1.30279	Har_00044044	Har_00044044	gi|3687299|emb|CAA06822.1|vacuolar ATPase, subunit M9.7 [Manduca sexta]
1.3e-05	0.004522	1	4.53572	3.30841	1.8129	Har_00084864	Har_00084864	gi|148908687|gb|ABR17451.1|unknown [Picea sitchensis]
5.6e-05	0.00796327	1	1.34878	0.614332	17.9901	Har_00001572	Har_00001572	gi|116833203|gb|ABK29514.1|ecdysteroid-regulated protein [Helicoverpa armigera]
0.000186	0.013436	1	2.50006	3.41598	1.05711	Har_00049006	Har_00049006	gi|170058014|ref|XP_001864736.1|troponin i [Culex quinquefasciatus] >gi|167877246|gb|EDS40629.1| troponin i [Culex quinquefasciatus]
0.000132	0.011727	1	2.10312	3.78286	1.01391	Har_00018405	Har_00018405	gi|148298754|ref|NP_001091815.1|putative farnesoic acid O-methyl transferase [Bombyx mori] >gi|110333475|gb|ABG67688.1| putative farnesoic acid O-methyl transferase [Bombyx mori]
0.000856	0.0281106	1	2.48958	0.708962	4.4282	Har_00099311	Har_00099311	gi|156553608|ref|XP_001599867.1|PREDICTED: similar to elongase, putative [Nasonia vitripennis]
0.002421	0.0484172	1	2.37116	4.69163	0.696285	Har_00094966	Har_00094966	gi|91088493|ref|XP_975965.1|PREDICTED: similar to CG3625 CG3625-PB isoform 2 [Tribolium castaneum]
6e-06	0.00301467	1	4.27908	3.08303	1.72741	Har_00038931	Har_00038931	gi|148908687|gb|ABR17451.1|unknown [Picea sitchensis]
0.0003	0.0168522	1	2.67866	4.22148	1.48827	Har_00019779	Har_00019779	gi|114052392|ref|NP_001040509.1|S-adenosylmethionine synthetase [Bombyx mori] >gi|95102576|gb|ABF51226.1| S-adenosylmethionine synthetase [Bombyx mori]
0.000142	0.0121385	1	3.15867	4.22564	1.78862	Har_00050998	Har_00050998	gi|171740913|gb|ACB54951.1|polycalin [Helicoverpa armigera]
8.8e-05	0.00972121	1	2.1613	6.54646	1.89832	Har_00075347	Har_00075347	gi|171740901|gb|ACB54945.1|azurocidin-like serine proteinase [Helicoverpa armigera]
0.000906	0.0290563	1	2.91077	3.839	1.50269	Har_00050984	Har_00050984	gi|171740913|gb|ACB54951.1|polycalin [Helicoverpa armigera]
6.3e-05	0.00833	1	2.5326	3.22339	1.10062	Har_00108730	Har_00108730	gi|156968305|gb|ABU98624.1|protease [Helicoverpa armigera]
0.00106	0.0314909	1	3.46037	3.73403	1.75996	Har_00217313	Har_00217313	na
0.001403	0.0367576	1	3.05755	0.940663	2.48236	Har_00021631	Har_00021631	gi|195155513|ref|XP_002018648.1|GL25909 [Drosophila persimilis] >gi|194114801|gb|EDW36844.1| GL25909 [Drosophila persimilis]
0.000824	0.0274586	1	2.67374	4.67407	1.83424	Har_00090477	Har_00090477	gi|171740913|gb|ACB54951.1|polycalin [Helicoverpa armigera]
0.000167	0.012865	1	2.17649	3.80302	1.23064	Har_00054699	Har_00054699	gi|148298754|ref|NP_001091815.1|putative farnesoic acid O-methyl transferase [Bombyx mori] >gi|110333475|gb|ABG67688.1| putative farnesoic acid O-methyl transferase [Bombyx mori]
0.000933	0.0297534	1	3.72609	3.05517	1.73043	Har_00046250	Har_00046250	gi|156538176|ref|XP_001600930.1|PREDICTED: similar to CG16771-PA, partial [Nasonia vitripennis]
0.00145	0.0373826	1	3.12203	2.21109	0.927803	Har_00047582	Har_00047582	gi|189235323|ref|XP_975184.2|PREDICTED: similar to AGAP012407-PA [Tribolium castaneum]
0.000444	0.0205714	1	1.15529	8.01158	1.10202	Har_00050080	Har_00050080	gi|110756431|ref|XP_001120252.1|PREDICTED: hypothetical protein [Apis mellifera]
0.00018	0.0133172	1	4.16482	3.00134	1.99422	Har_00064806	Har_00064806	gi|156968289|gb|ABU98616.1|chitin binding PM protein [Helicoverpa armigera]
0.000187	0.0134652	1	2.29272	3.10179	0.881007	Har_00042496	Har_00042496	gi|183979372|dbj|BAG30738.1|troponin T [Papilio xuthus]
0.002385	0.0481902	1	2.35099	3.05915	1.15321	Har_00041025	Har_00041025	gi|183979288|dbj|BAG30767.1|cuticular protein CPR54 [Papilio xuthus]
0.000187	0.0134652	1	2.53731	4.26073	1.7772	Har_00021928	Har_00021928	gi|170028640|ref|XP_001842203.1|conserved hypothetical protein [Culex quinquefasciatus] >gi|167876325|gb|EDS39708.1| conserved hypothetical protein [Culex quinquefasciatus]
0.001099	0.0320211	1	3.30119	3.06682	1.69822	Har_00008371	Har_00008371	gi|212509139|gb|EEB12616.1|Alkaline phosphatase, tissue-nonspecific isozyme precursor, putative [Pediculus humanus corporis]
0.000228	0.0146243	1	3.23649	3.60128	1.95919	Har_00003184	Har_00003184	gi|30961821|gb|AAP37951.1|midgut aminopeptidase N2 [Helicoverpa armigera] >gi|33641859|gb|AAQ24379.1| midgut aminopeptidase N2 [Helicoverpa armigera]
0.000886	0.0287204	1	2.42462	2.98692	1.2258	Har_00103916	Har_00103916	gi|170053131|ref|XP_001862534.1|transmembrane protein 38A [Culex quinquefasciatus] >gi|170056561|ref|XP_001864085.1| transmembrane protein 38A [Culex quinquefasciatus] >gi|167873789|gb|EDS37172.1| transmembrane protein 38A [Culex quinquefasciatus] >g
1.4e-05	0.00462102	1	2.96069	6.0218	0.328937	Har_00089677	Har_00089677	gi|56462278|gb|AAV91422.1|hypothetical protein 21 [Lonomia obliqua]
3.4e-05	0.00676368	1	2.96814	5.80747	0.332176	Har_00034444	Har_00034444	gi|56462278|gb|AAV91422.1|hypothetical protein 21 [Lonomia obliqua]
0.001172	0.033374	1	2.05375	1.57499	4.33873	Har_00046009	Har_00046009	gi|116780454|gb|ABK21687.1|unknown [Picea sitchensis]
4.3e-05	0.0072882	1	2.61962	3.63453	1.68928	Har_00099776	Har_00099776	gi|170028640|ref|XP_001842203.1|conserved hypothetical protein [Culex quinquefasciatus] >gi|167876325|gb|EDS39708.1| conserved hypothetical protein [Culex quinquefasciatus]
2.5e-05	0.00609181	1	4.39095	2.27266	1.78281	Har_00084213	Har_00084213	gi|148908687|gb|ABR17451.1|unknown [Picea sitchensis]
0.000565	0.0231635	1	1.59781	11.0023	0.812112	Har_00041866	Har_00041866	gi|223671107|tpd|FAA00505.1|TPA: putative cuticle protein [Bombyx mori]
2.1e-05	0.00582589	1	2.47293	4.48342	1.98308	Har_00051739	Har_00051739	gi|170028640|ref|XP_001842203.1|conserved hypothetical protein [Culex quinquefasciatus] >gi|167876325|gb|EDS39708.1| conserved hypothetical protein [Culex quinquefasciatus]
0.002515	0.0492757	1	3.86908	1.85996	2.67838	Har_00026362	Har_00026362	gi|171740913|gb|ACB54951.1|polycalin [Helicoverpa armigera]
0.000576	0.0233785	1	2.88655	3.35976	1.75216	Har_00082689	Har_00082689	gi|30961821|gb|AAP37951.1|midgut aminopeptidase N2 [Helicoverpa armigera] >gi|33641859|gb|AAQ24379.1| midgut aminopeptidase N2 [Helicoverpa armigera]
0.000588	0.0235096	1	1.79628	10.1867	0.974639	Har_00028968	Har_00028968	gi|223671062|tpd|FAA00482.1|TPA: putative cuticle protein [Bombyx mori]
0.000727	0.0260499	1	2.44618	3.32211	1.47599	Har_00065370	Har_00065370	gi|189240275|ref|XP_001812469.1|PREDICTED: similar to CG7702 CG7702-PA [Tribolium castaneum]
0.001947	0.0436074	1	1.59577	3.82275	2.29612	Har_00218085	Har_00218085	na
9e-06	0.00383943	1	4.78729	1.98071	2.27427	Har_00065187	Har_00065187	gi|195155513|ref|XP_002018648.1|GL25909 [Drosophila persimilis] >gi|194114801|gb|EDW36844.1| GL25909 [Drosophila persimilis]
0.001882	0.0430036	1	2.45695	4.23001	1.8973	Har_00117707	Har_00117707	gi|58387602|ref|XP_315683.2|AGAP005662-PA [Anopheles gambiae str. PEST] >gi|55238468|gb|EAA11811.3| AGAP005662-PA [Anopheles gambiae str. PEST]
0.001107	0.0320683	1	3.45107	2.21149	1.40021	Har_00030160	Har_00030160	gi|116326818|ref|YP_803355.1|hypothetical protein TNAV2c_gp132 [Trichoplusia ni ascovirus 2c] >gi|102231826|gb|ABF70649.1| hypothetical protein [Trichoplusia ni ascovirus 2c]
0.00034	0.0179094	1	3.32193	2.60034	1.61438	Har_00017014	Har_00017014	gi|212509139|gb|EEB12616.1|Alkaline phosphatase, tissue-nonspecific isozyme precursor, putative [Pediculus humanus corporis]
0.000747	0.0263666	1	2.24056	4.37721	0.54468	Har_00094911	Har_00094911	gi|66553144|ref|XP_393157.2|PREDICTED: similar to CG7686-PA [Apis mellifera]
0.000391	0.019094	1	2.27709	3.9784	1.70778	Har_00019631	Har_00019631	gi|170028640|ref|XP_001842203.1|conserved hypothetical protein [Culex quinquefasciatus] >gi|167876325|gb|EDS39708.1| conserved hypothetical protein [Culex quinquefasciatus]
0.001939	0.0435144	1	3.299	2.33019	1.46146	Har_00233843	Har_00233843	na
0.000281	0.0165024	1	2.75519	4.81057	0.392411	Har_00092368	Har_00092368	gi|56462278|gb|AAV91422.1|hypothetical protein 21 [Lonomia obliqua]
0.001442	0.0372187	1	3.38009	1.83623	2.79405	Har_00006949	Har_00006949	na
0.000209	0.013919	1	2.01363	2.5484	0.992453	Har_00049208	Har_00049208	gi|114052689|ref|NP_001040490.1|ecto-nucleotidase [Bombyx mori] >gi|95103108|gb|ABF51495.1| ecto-nucleotidase [Bombyx mori]
6.4e-05	0.00837407	1	2.37448	2.81905	0.751039	Har_00045003	Har_00045003	gi|111550264|gb|ABH10141.1|HMG176 [Helicoverpa armigera] >gi|116833119|gb|ABK29472.1| HMG176 [Helicoverpa armigera]
0.000837	0.0277006	1	1.88143	4.26108	2.21027	Har_00009014	Har_00009014	gi|4235368|gb|AAD13187.1|follicular epithelium yolk protein subunit [Plodia interpunctella]
2.8e-05	0.0062993	1	2.58381	2.56069	1.34152	Har_00093248	Har_00093248	gi|218436706|dbj|BAH03386.1|putative acetyl transferase [Ostrinia scapulalis]
0.000575	0.0233785	1	2.63754	2.67566	1.43716	Har_00011994	Har_00011994	gi|56199450|gb|AAV84214.1|cytochrome B5 [Culicoides sonorensis]
0.000448	0.0206299	1	2.21349	4.25839	1.93539	Har_00019634	Har_00019634	gi|170028640|ref|XP_001842203.1|conserved hypothetical protein [Culex quinquefasciatus] >gi|167876325|gb|EDS39708.1| conserved hypothetical protein [Culex quinquefasciatus]
0.000638	0.024491	1	2.18974	2.5264	1.15886	Har_00005909	Har_00005909	gi|197322814|gb|ACH69158.1|myosin heavy chain [Bombyx mori]
0.00019	0.0135517	1	3.22237	2.75947	1.89637	Har_00024167	Har_00024167	gi|195155513|ref|XP_002018648.1|GL25909 [Drosophila persimilis] >gi|194114801|gb|EDW36844.1| GL25909 [Drosophila persimilis]
3.1e-05	0.00661236	1	2.65368	5.43701	0.32274	Har_00115243	Har_00115243	gi|56462278|gb|AAV91422.1|hypothetical protein 21 [Lonomia obliqua]
0.00046	0.0208638	1	2.43768	3.29555	1.73098	Har_00100228	Har_00100228	gi|170028640|ref|XP_001842203.1|conserved hypothetical protein [Culex quinquefasciatus] >gi|167876325|gb|EDS39708.1| conserved hypothetical protein [Culex quinquefasciatus]
7.3e-05	0.00887382	1	2.17846	3.46994	1.65377	Har_00051071	Har_00051071	gi|171740913|gb|ACB54951.1|polycalin [Helicoverpa armigera]
1.9e-05	0.00550756	1	2.84193	2.35873	1.48132	Har_00105107	Har_00105107	gi|21311448|gb|AAM46727.1|AF453436_1azurocidin-like precursor protein [Trichoplusia ni]
8.3e-05	0.00938315	1	2.10012	2.667	0.799389	Har_00078445	Har_00078445	gi|183979300|dbj|BAG30761.1|similar to CG6803-PB [Papilio xuthus]
5.7e-05	0.00798	1	1.05686	5.13238	0.919327	Har_00186320	Har_00186320	na
0.000699	0.0256357	1	2.45574	2.03196	1.12949	Har_00043329	Har_00043329	gi|218436706|dbj|BAH03386.1|putative acetyl transferase [Ostrinia scapulalis]
0.000101	0.0101269	1	3.5891	2.21965	1.87334	Har_00021634	Har_00021634	gi|195155513|ref|XP_002018648.1|GL25909 [Drosophila persimilis] >gi|194114801|gb|EDW36844.1| GL25909 [Drosophila persimilis]
0.001315	0.0356929	1	3.84896	2.14601	1.96595	Har_00002060	Har_00002060	gi|156968289|gb|ABU98616.1|chitin binding PM protein [Helicoverpa armigera]
0.001046	0.0313246	1	1.7728	12.2766	0.604645	Har_00004112	Har_00004112	gi|68226711|ref|NP_001020173.1|hypothetical protein LOC310926 [Rattus norvegicus] >gi|32264609|gb|AAP78751.1| Ac1147 [Rattus norvegicus] >gi|32492558|gb|AAP85367.1| Aa1011 [Rattus norvegicus] >gi|32492570|gb|AAP85373.1| Aa1262 [Rattus norvegicus] >gi
0.000835	0.0276823	1	2.24261	2.39393	1.28512	Har_00098083	Har_00098083	gi|189236205|ref|XP_970721.2|PREDICTED: similar to iPLA-2 [Tribolium castaneum]
0.000213	0.0140406	1	2.27549	2.69422	1.50914	Har_00081078	Har_00081078	na
0.000809	0.0272798	1	2.74123	2.16363	1.48997	Har_00021531	Har_00021531	gi|21311448|gb|AAM46727.1|AF453436_1azurocidin-like precursor protein [Trichoplusia ni]
0.001477	0.0376493	1	3.25573	1.70383	2.06713	Har_00103691	Har_00103691	gi|114052488|ref|NP_001040507.1|alcohol dehydrogenase [Bombyx mori] >gi|95104529|gb|ABF51211.1| alcohol dehydrogenase [Bombyx mori]
1e-06	0.00155931	1	3.03086	2.03899	1.56643	Har_00018429	Har_00018429	gi|56199450|gb|AAV84214.1|cytochrome B5 [Culicoides sonorensis]
0.000481	0.0215185	1	1.8322	8.24241	0.873069	Har_00153790	Har_00153790	na
0.001648	0.0401522	1	2.55227	2.68604	1.76053	Har_00033217	Har_00033217	gi|91083623|ref|XP_970124.1|PREDICTED: similar to citrate synthase [Tribolium castaneum]
0.000252	0.015504	1	1.81674	9.67504	0.720523	Har_00051760	Har_00051760	gi|112982880|ref|NP_001037572.1|translationally controlled tumor protein [Bombyx mori] >gi|74860221|sp|Q75VN3.1|TCTP_BOMMO RecName: Full=Translationally-controlled tumor protein homolog; Short=TCTP; AltName: Full=BmTCTP >gi|37857713|dbj|BAC99978.1| t
0.000775	0.0268137	1	1.66112	6.4222	0.956625	Har_00217955	Har_00217955	na
0.000483	0.0215185	1	1.16103	0.699643	6.02975	Har_00228664	Har_00228664	na
0.001057	0.0314665	1	1.76543	9.77912	0.651237	Har_00001652	Har_00001652	gi|116833151|gb|ABK29488.1|promoting protein [Helicoverpa armigera]
0.00065	0.0247416	1	2.92164	1.73691	2.07716	Har_00117654	Har_00117654	gi|2970687|gb|AAC06038.1|beta-glucosidase precursor [Spodoptera frugiperda]
0.002534	0.0494978	1	1.39533	0.989364	4.89843	Har_00004028	Har_00004028	gi|4583519|gb|AAD25106.1|AF140278_1cytochrome P450 CYP6B9 [Helicoverpa zea]
0.00201	0.0442298	1	2.40439	1.81728	2.5473	Har_00118255	Har_00118255	gi|116783304|gb|ABK22882.1|unknown [Picea sitchensis]
0.00095	0.0299993	1	2.35755	2.82998	1.98572	Har_00205267	Har_00205267	na
0.000363	0.0185269	1	2.09417	1.7591	2.8088	Har_00118258	Har_00118258	gi|116783304|gb|ABK22882.1|unknown [Picea sitchensis]
0.001952	0.0436329	1	1.82284	6.17993	1.01445	Har_00001595	Har_00001595	gi|54039495|sp|Q8WQI3.1|RS29_SPOFRRecName: Full=40S ribosomal protein S29 >gi|18253059|gb|AAL62474.1| ribosomal protein S29 [Spodoptera frugiperda] >gi|116833189|gb|ABK29507.1| ribosomal protein S29 [Helicoverpa armigera]
0.000349	0.01814	1	2.65966	3.51138	0.35045	Har_00092374	Har_00092374	gi|56462278|gb|AAV91422.1|hypothetical protein 21 [Lonomia obliqua]
0.00053	0.022525	1	1.58166	6.38478	0.808181	Har_00175708	Har_00175708	na
0.001774	0.0417814	1	1.57188	5.74298	0.880125	Har_00059672	Har_00059672	gi|121511906|gb|ABM55404.1|putative secreted salivary protein [Xenopsylla cheopis]
0.000681	0.0252417	1	1.96328	6.57936	1.06864	Har_00073477	Har_00073477	gi|112984128|ref|NP_001037249.1|ribosomal protein L37A [Bombyx mori] >gi|15213794|gb|AAK92172.1|AF400200_1 ribosomal protein L37A [Spodoptera frugiperda] >gi|54609271|gb|AAV34851.1| ribosomal protein L37A [Bombyx mori]
0.002437	0.0485866	1	1.32785	0.964819	4.30168	Har_00003637	Har_00003637	gi|111378686|gb|ABH09251.1|putative DNA-mediated transposase [Helicoverpa zea]
0.001018	0.0309784	1	1.69696	6.77593	0.777147	Har_00125019	Har_00125019	na
0.000641	0.0245436	1	1.20674	4.44852	1.21115	Har_00033048	Har_00033048	gi|157125332|ref|XP_001654295.1|mitochondrial ribosomal protein, L51, putative [Aedes aegypti] >gi|108873670|gb|EAT37895.1| mitochondrial ribosomal protein, L51, putative [Aedes aegypti]
0.000961	0.0301153	1	1.55641	4.91261	1.03771	Har_00057363	Har_00057363	gi|114864627|gb|ABI83751.1|putative 6.3 kDa salivary peptide [Anopheles funestus]
0.001002	0.0308025	1	1.72481	6.29624	0.826645	Har_00094288	Har_00094288	gi|195431748|ref|XP_002063890.1|GK15915 [Drosophila willistoni] >gi|194159975|gb|EDW74876.1| GK15915 [Drosophila willistoni]
0.002237	0.046637	1	1.33797	4.1608	0.966988	Har_00019480	Har_00019480	gi|400673|sp|P31420|OMBP_MANSEOmmochrome-binding protein precursor (OBP) (YCP) >gi|159534|gb|AAA29324.1| ommochrome-binding protein
0.000781	0.0268365	1	1.64878	1.40968	6.8611	Har_00000409	Har_00000409	gi|47606858|gb|AAT36350.1|cytochrome P450 [Helicoverpa armigera] >gi|91795211|gb|ABE60887.1| cytochrome p450 6B7 [Helicoverpa armigera]
0.001329	0.0357566	1	1.94161	0.793438	7.1855	Har_00091575	Har_00091575	gi|148908323|gb|ABR17275.1|unknown [Picea sitchensis]
2.5e-05	0.00609181	1	2.3286	2.38142	1.89411	Har_00079121	Har_00079121	gi|114051844|ref|NP_001040432.1|dicarbonyl L-xylulose reductase [Bombyx mori] >gi|95102868|gb|ABF51375.1| dicarbonyl L-xylulose reductase [Bombyx mori]
0.001982	0.0438913	1	1.65028	4.84656	1.00691	Har_00024764	Har_00024764	gi|156547534|ref|XP_001607285.1|PREDICTED: similar to ENSANGP00000012317 [Nasonia vitripennis]
4.4e-05	0.0072882	1	1.07085	3.41602	1.097	Har_00007543	Har_00007543	gi|157115782|ref|XP_001652694.1|hypothetical protein AaeL_AAEL007342 [Aedes aegypti] >gi|108876762|gb|EAT40987.1| conserved hypothetical protein [Aedes aegypti]
2.6e-05	0.00609181	1	1.65556	6.25448	0.766406	Har_00065141	Har_00065141	na
0.001436	0.0371487	1	0.782065	1.16572	4.3139	Har_00070434	Har_00070434	gi|8926312|gb|AAF81787.1|AF272342_1acyl-CoA delta-11 desaturase [Helicoverpa zea]
9.3e-05	0.00994199	1	2.20222	3.37272	0.38415	Har_00115947	Har_00115947	gi|170070131|ref|XP_001869475.1|pancreatic triacylglycerol lipase [Culex quinquefasciatus] >gi|167866044|gb|EDS29427.1| pancreatic triacylglycerol lipase [Culex quinquefasciatus]
0.000163	0.0127424	1	2.53075	3.66642	0.306233	Har_00034443	Har_00034443	gi|56462278|gb|AAV91422.1|hypothetical protein 21 [Lonomia obliqua]
0.002148	0.0460275	1	1.96912	2.2222	2.48528	Har_00023569	Har_00023569	gi|51105582|gb|AAT97263.1|endo-1,4-beta-glucanase [Bacillus sp. NW-2004b]
0.000173	0.0130602	1	1.34287	4.86412	1.2959	Har_00010825	Har_00010825	gi|156968297|gb|ABU98620.1|unknown [Helicoverpa armigera]
0.001004	0.0308221	1	2.30743	2.06919	0.581996	Har_00026945	Har_00026945	gi|157141931|ref|XP_001647771.1|hypothetical protein AaeL_AAEL015357 [Aedes aegypti] >gi|108868119|gb|EAT32439.1| conserved hypothetical protein [Aedes aegypti]
0.000483	0.0215185	1	1.16875	3.3254	1.02515	Har_00209163	Har_00209163	na
0.000196	0.0136777	1	1.49751	5.4207	0.762527	Har_00191366	Har_00191366	gi|223670972|tpd|FAA00437.1|TPA: putative cuticle protein [Bombyx mori]
0.000649	0.0247416	1	1.75414	1.78557	8.64472	Har_00003806	Har_00003806	gi|22085153|gb|AAM90318.1|AF285831_1cytochrome P450 6B27 [Helicoverpa zea]
0.00247	0.0488384	1	2.0468	2.66254	1.99279	Har_00003103	Har_00003103	gi|40022264|gb|AAR37334.1|diazepam-binding inhibitor [Helicoverpa armigera]
0.000685	0.0253484	1	1.34284	3.91763	1.07602	Har_00238980	Har_00238980	na
0.001216	0.0339639	1	1.45121	4.79935	0.818237	Har_00133777	Har_00133777	na
0.00155	0.0388747	1	1.34994	3.6653	0.992673	Har_00086985	Har_00086985	gi|195445196|ref|XP_002070217.1|GK11151 [Drosophila willistoni] >gi|194166302|gb|EDW81203.1| GK11151 [Drosophila willistoni]
0.001485	0.0377469	1	0.994691	2.90793	0.93154	Har_00072859	Har_00072859	gi|195384987|ref|XP_002051191.1|GJ13600 [Drosophila virilis] >gi|194147648|gb|EDW63346.1| GJ13600 [Drosophila virilis]
9.8e-05	0.0100035	1	1.92163	6.409	0.797099	Har_00167692	Har_00167692	gi|156354064|ref|XP_001623223.1|predicted protein [Nematostella vectensis] >gi|156209900|gb|EDO31123.1| predicted protein [Nematostella vectensis]
0.001104	0.0320224	1	1.47096	4.04852	1.04634	Har_00130450	Har_00130450	na
0.000205	0.0138415	1	1.75571	5.19392	0.886836	Har_00060129	Har_00060129	gi|49036475|sp|Q962S0.1|RS7_SPOFRRecName: Full=40S ribosomal protein S7 >gi|15213806|gb|AAK92178.1|AF400206_1 ribosomal protein S7 [Spodoptera frugiperda]
0.000241	0.0151361	1	2.48156	2.88936	0.356492	Har_00115946	Har_00115946	gi|170070131|ref|XP_001869475.1|pancreatic triacylglycerol lipase [Culex quinquefasciatus] >gi|167866044|gb|EDS29427.1| pancreatic triacylglycerol lipase [Culex quinquefasciatus]
0.000579	0.023398	1	1.46151	4.20813	0.887218	Har_00031946	Har_00031946	gi|183979315|dbj|BAG30754.1|DEAD box polypeptide 5 [Papilio xuthus]
0.002573	0.0498505	1	1.45275	4.13338	1.1277	Har_00048379	Har_00048379	gi|121511906|gb|ABM55404.1|putative secreted salivary protein [Xenopsylla cheopis]
0.001326	0.0357553	1	1.50494	4.97453	0.762955	Har_00120317	Har_00120317	gi|195132981|ref|XP_002010918.1|GI21440 [Drosophila mojavensis] >gi|193907706|gb|EDW06573.1| GI21440 [Drosophila mojavensis]
0.001665	0.0403923	1	1.20933	0.725738	4.19129	Har_00063476	Har_00063476	gi|91094133|ref|XP_966520.1|PREDICTED: similar to Y7A5A.1 [Tribolium castaneum]
0.00243	0.0484928	1	0.697232	0.749869	4.75217	Har_00003891	Har_00003891	gi|8926312|gb|AAF81787.1|AF272342_1acyl-CoA delta-11 desaturase [Helicoverpa zea]
0.000195	0.01365	1	1.55486	3.93829	1.02764	Har_00048569	Har_00048569	gi|114051495|ref|NP_001040303.1|NADH-ubiquinone oxidoreductase B8 subunit [Bombyx mori] >gi|87248185|gb|ABD36145.1| NADH-ubiquinone oxidoreductase B8 subunit [Bombyx mori]
0.000734	0.0261145	1	1.65022	4.46679	1.09949	Har_00088542	Har_00088542	gi|158289290|ref|XP_311038.4|AGAP000109-PA [Anopheles gambiae str. PEST] >gi|157018983|gb|EAA06565.4| AGAP000109-PA [Anopheles gambiae str. PEST]
0.000174	0.013092	1	1.87192	0.836669	5.49526	Har_00057575	Har_00057575	gi|91094133|ref|XP_966520.1|PREDICTED: similar to Y7A5A.1 [Tribolium castaneum]
0.001437	0.0371533	1	1.75521	4.36742	1.01574	Har_00111812	Har_00111812	gi|112984360|ref|NP_001037207.1|ribosomal protein S21 [Bombyx mori] >gi|74837362|sp|Q6PUF8|RS21_BOMMO 40S ribosomal protein S21 >gi|74844827|sp|Q962Q8|RS21_SPOFR 40S ribosomal protein S21 >gi|15213830|gb|AAK92190.1|AF400218_1 ribosomal protein S21 [S
0.000389	0.019058	1	1.09684	2.91271	1.08605	Har_00055407	Har_00055407	gi|148298659|ref|NP_001091811.1|mitochondrial ribosomal protein L32 [Bombyx mori] >gi|87248541|gb|ABD36323.1| mitochondrial ribosomal protein L32 [Bombyx mori]
0.000992	0.0307038	1	0.956522	0.888233	2.85773	Har_00239787	Har_00239787	na
0.000338	0.0178347	1	1.62067	4.04262	1.03094	Har_00048235	Har_00048235	gi|18253053|gb|AAL62471.1|ribosomal protein L34 [Spodoptera frugiperda]
5.2e-05	0.00763455	1	1.41675	5.45899	0.625152	Har_00157466	Har_00157466	na
0.001918	0.043301	1	0.999792	2.5754	1.08104	Har_00011812	Har_00011812	gi|212505428|gb|EEB09889.1|zfpl1, putative [Pediculus humanus corporis]
6.4e-05	0.00837407	1	1.68573	4.67842	0.844547	Har_00060428	Har_00060428	gi|51316900|sp|Q962Q5.1|RS25_SPOFRRecName: Full=40S ribosomal protein S25 >gi|15213836|gb|AAK92193.1|AF400221_1 ribosomal protein S25 [Spodoptera frugiperda]
0.000647	0.0246897	1	0.646051	1.14248	4.05384	Har_00106114	Har_00106114	gi|194898833|ref|XP_001978967.1|GG10914 [Drosophila erecta] >gi|190650670|gb|EDV47925.1| GG10914 [Drosophila erecta]
0.00168	0.0405604	1	1.7775	4.724	1.16121	Har_00017252	Har_00017252	gi|223671034|tpd|FAA00468.1|TPA: putative cuticle protein [Bombyx mori]
0.001521	0.0382747	1	1.57001	5.33698	1.48567	Har_00050810	Har_00050810	gi|3869218|dbj|BAA34401.1|MBF2 [Bombyx mandarina]
0.001976	0.0438013	1	1.04753	3.42154	0.690786	Har_00072336	Har_00072336	na
0.000935	0.0297961	1	1.3003	3.2169	0.911939	Har_00019484	Har_00019484	gi|91083001|ref|XP_974458.1|PREDICTED: similar to collagen alpha-2(IV) chain [Tribolium castaneum]
0.002307	0.0474193	1	1.6096	4.35631	1.20443	Har_00043567	Har_00043567	gi|146746652|gb|ABQ43785.1|mitochondrial cytochrome c oxidase subunit VIa [Bombyx mori]
0.000159	0.0126269	1	1.54699	5.22495	0.661801	Har_00133778	Har_00133778	na
0.001763	0.0416961	1	1.59236	4.3501	1.22744	Har_00031245	Har_00031245	gi|157361549|gb|ABV44732.1|15.9 kDa midgut protein [Phlebotomus papatasi]
0.001862	0.0429464	1	1.69593	4.37414	1.16394	Har_00017253	Har_00017253	gi|223671034|tpd|FAA00468.1|TPA: putative cuticle protein [Bombyx mori]
0.000854	0.0280857	1	1.86865	4.78235	1.15605	Har_00057992	Har_00057992	gi|193683656|ref|XP_001942834.1|PREDICTED: similar to Y54G2A.42 [Acyrthosiphon pisum]
0.000254	0.0155846	1	1.08491	2.76345	0.867996	Har_00106321	Har_00106321	gi|158293339|ref|XP_314699.4|AGAP008600-PA [Anopheles gambiae str. PEST] >gi|157016657|gb|EAA10220.4| AGAP008600-PA [Anopheles gambiae str. PEST]
0.000546	0.0227136	1	0.909951	2.47541	0.980351	Har_00034129	Har_00034129	gi|157704353|gb|ABV68865.1|RPS18 [Trichoplusia ni]
0.002189	0.0461472	1	1.12863	2.63192	1.05872	Har_00147765	Har_00147765	gi|116780475|gb|ABK21697.1|unknown [Picea sitchensis]
0.000528	0.0225035	1	1.70912	3.91871	1.04295	Har_00078351	Har_00078351	gi|112984118|ref|NP_001037251.1|ribosomal protein L39 [Bombyx mori] >gi|209571492|ref|NP_001129377.1| ribosomal protein L39 [Apis mellifera] >gi|209571494|ref|NP_001129378.1| ribosomal protein L39 [Tribolium castaneum] >gi|209862827|ref|NP_001129486.
0.002014	0.0442747	1	1.25227	3.09075	0.890637	Har_00032208	Har_00032208	gi|157125332|ref|XP_001654295.1|mitochondrial ribosomal protein, L51, putative [Aedes aegypti] >gi|108873670|gb|EAT37895.1| mitochondrial ribosomal protein, L51, putative [Aedes aegypti]
0.000743	0.0262693	1	1.16175	3.58181	0.71028	Har_00109595	Har_00109595	gi|158262817|gb|ABW24185.1|efibroin [Aposthonia gurneyi]
0.000487	0.0215692	1	1.72975	3.91972	1.04738	Har_00047143	Har_00047143	gi|91078240|ref|XP_970169.1|PREDICTED: similar to stunted CG9032-PB [Tribolium castaneum]
0.000517	0.0222443	1	1.1767	3.68818	0.689112	Har_00226148	Har_00226148	na
0.002017	0.0443191	1	1.75162	4.87732	0.767043	Har_00114675	Har_00114675	gi|198417193|ref|XP_002128747.1|PREDICTED: similar to LTV1 homolog [Ciona intestinalis]
0.000616	0.0240549	1	1.52071	3.64541	1.12417	Har_00215982	Har_00215982	na
0.002208	0.0463301	1	1.50168	4.26688	1.33728	Har_00174709	Har_00174709	na
0.00173	0.0413065	1	1.07675	2.92649	0.780008	Har_00218526	Har_00218526	na
0.000863	0.0282707	1	1.61178	4.27031	1.26883	Har_00057362	Har_00057362	gi|114864627|gb|ABI83751.1|putative 6.3 kDa salivary peptide [Anopheles funestus]
0.000418	0.0199598	1	1.78563	3.94858	1.05905	Har_00047457	Har_00047457	gi|148298804|ref|NP_001091753.1|ribosomal protein L36A [Bombyx mori] >gi|54609267|gb|AAV34849.1| ribosomal protein L36A [Bombyx mori]
0.000487	0.0215692	1	0.528322	4.35158	0.906312	Har_00034256	Har_00034256	gi|148906088|gb|ABR16203.1|unknown [Picea sitchensis]
0.000569	0.0232432	1	1.15899	2.59208	0.927513	Har_00099447	Har_00099447	gi|153792114|ref|NP_001093267.1|phosphatidylethanolamine binding protein [Bombyx mori] >gi|95102826|gb|ABF51354.1| phosphatidylethanolamine binding protein isoform 2 [Bombyx mori]
0.001083	0.0318836	1	1.07541	2.48866	1.11647	Har_00116488	Har_00116488	gi|189241522|ref|XP_001809489.1|PREDICTED: similar to BolA protein, putative [Tribolium castaneum]
0.001056	0.0314574	1	1.49707	3.2546	1.05254	Har_00038917	Har_00038917	gi|118780788|ref|XP_310423.3|AGAP003864-PA [Anopheles gambiae str. PEST] >gi|116131032|gb|EAA06017.4| AGAP003864-PA [Anopheles gambiae str. PEST]
0.001564	0.0390741	1	0.744875	3.18415	0.869634	Har_00006364	Har_00006364	gi|157115782|ref|XP_001652694.1|hypothetical protein AaeL_AAEL007342 [Aedes aegypti] >gi|108876762|gb|EAT40987.1| conserved hypothetical protein [Aedes aegypti]
1.6e-05	0.0049219	1	1.64652	3.41539	0.993871	Har_00073476	Har_00073476	gi|112984128|ref|NP_001037249.1|ribosomal protein L37A [Bombyx mori] >gi|15213794|gb|AAK92172.1|AF400200_1 ribosomal protein L37A [Spodoptera frugiperda] >gi|54609271|gb|AAV34851.1| ribosomal protein L37A [Bombyx mori]
0.002165	0.0460275	1	1.37231	2.87618	0.98214	Har_00004410	Har_00004410	gi|114053263|ref|NP_001040283.1|mitochondrial thioredoxin 2 [Bombyx mori] >gi|87248631|gb|ABD36368.1| mitochondrial thioredoxin 2 [Bombyx mori]
0.000157	0.0126102	1	1.58388	3.44714	0.944511	Har_00077624	Har_00077624	gi|160947858|gb|ABX54738.1|ribosomal protein L10 [Spodoptera exigua]
0.001086	0.0319096	1	1.27664	4.06206	0.645474	Har_00021370	Har_00021370	gi|156541498|ref|XP_001601228.1|PREDICTED: similar to pol-like protein [Nasonia vitripennis]
0.000227	0.0146016	1	1.62146	3.64859	1.10122	Har_00028539	Har_00028539	gi|17368248|sp|P58375.1|RL30_SPOFRRecName: Full=60S ribosomal protein L30 >gi|15213780|gb|AAK92165.1|AF400193_1 ribosomal protein L30 [Spodoptera frugiperda]
0.000572	0.0233236	1	1.00401	2.37296	1.15841	Har_00042592	Har_00042592	gi|114052649|ref|NP_001040265.1|phosphohistidine phosphatase [Bombyx mori] >gi|87248559|gb|ABD36332.1| phosphohistidine phosphatase [Bombyx mori]
0.001975	0.0438006	1	1.25117	3.2185	0.79307	Har_00037251	Har_00037251	gi|14860969|gb|AAK72378.1|60S ribosomal protein L7/L12 precursor [Spodoptera frugiperda]
0.000183	0.0133257	1	3.95659	1.81132	1.0818	Har_00117746	Har_00117746	gi|114051590|ref|NP_001040355.1|cellular retinaldehyde-binding protein [Bombyx mori] >gi|95102616|gb|ABF51246.1| cellular retinaldehyde-binding protein [Bombyx mori]
0.000468	0.0210786	1	1.07254	2.80187	1.29618	Har_00018930	Har_00018930	gi|91077572|ref|XP_972780.1|PREDICTED: similar to mitochondrial ribosomal protein, L46, putative [Tribolium castaneum]
0.002367	0.0481224	1	0.796154	3.12531	0.809807	Har_00166532	Har_00166532	na
0.002187	0.0461472	1	2.26375	0.270719	3.27653	Har_00072080	Har_00072080	gi|116789445|gb|ABK25249.1|unknown [Picea sitchensis]
0.001346	0.0359304	1	1.66891	3.80588	1.14626	Har_00042681	Har_00042681	gi|158289290|ref|XP_311038.4|AGAP000109-PA [Anopheles gambiae str. PEST] >gi|157018983|gb|EAA06565.4| AGAP000109-PA [Anopheles gambiae str. PEST]
0.002428	0.0484928	1	1.292	3.36566	0.758231	Har_00049378	Har_00049378	gi|66501042|ref|XP_623980.1|PREDICTED: similar to CG32590-PA [Apis mellifera]
0.001325	0.0357553	1	1.2836	2.5913	1.02398	Har_00049673	Har_00049673	gi|87248177|gb|ABD36141.1|ribosomal protein L27 [Bombyx mori]
0.00123	0.034207	1	1.57683	3.52472	0.871819	Har_00112203	Har_00112203	gi|112984298|ref|NP_001037223.1|ribosomal protein L21 [Bombyx mori] >gi|54609233|gb|AAV34832.1| ribosomal protein L21 [Bombyx mori]
0.000173	0.0130602	1	1.72154	3.45195	1.03012	Har_00038061	Har_00038061	gi|54609197|gb|AAV34814.1|ribosomal protein L5 [Bombyx mori]
0.001617	0.0397395	1	0.930572	2.31143	0.902463	Har_00062308	Har_00062308	gi|148298867|ref|NP_001091827.1|LSM1-like protein [Bombyx mori] >gi|95102704|gb|ABF51290.1| LSM1-like protein [Bombyx mori]
2.5e-05	0.00609181	1	0.763526	3.6739	0.691845	Har_00024694	Har_00024694	gi|157115782|ref|XP_001652694.1|hypothetical protein AaeL_AAEL007342 [Aedes aegypti] >gi|108876762|gb|EAT40987.1| conserved hypothetical protein [Aedes aegypti]
0.002189	0.0461472	1	1.39538	4.02263	0.672959	Har_00085162	Har_00085162	gi|293226|gb|AAA29341.1|trypsin
0.001061	0.0314909	1	0.973734	1.39957	2.78487	Har_00117588	Har_00117588	gi|152979284|ref|YP_001344913.1|short-chain dehydrogenase/reductase SDR [Actinobacillus succinogenes 130Z] >gi|150841007|gb|ABR74978.1| short-chain dehydrogenase/reductase SDR [Actinobacillus succinogenes 130Z]
0.000904	0.0290448	1	1.64706	3.41167	0.93469	Har_00025453	Har_00025453	gi|189237290|ref|XP_974070.2|PREDICTED: similar to isocitrate dehydrogenase [Tribolium castaneum]
0.000269	0.0161115	1	1.39088	3.65287	0.730963	Har_00051132	Har_00051132	gi|112984078|ref|NP_001037257.1|ribosomal protein S4 [Bombyx mori] >gi|74782218|sp|Q5UAP0.1|RS4_BOMMO RecName: Full=40S ribosomal protein S4 >gi|54609289|gb|AAV34860.1| ribosomal protein S4 [Bombyx mori]
0.001958	0.0436376	1	0.991181	2.16814	0.892281	Har_00056183	Har_00056183	gi|114051996|ref|NP_001040202.1|nonclathrin coat protein zeta 1-COP [Bombyx mori] >gi|87248373|gb|ABD36239.1| nonclathrin coat protein zeta 1-COP [Bombyx mori]
0.001317	0.0357043	1	1.33668	2.88557	0.884396	Har_00001589	Har_00001589	gi|116833193|gb|ABK29509.1|ribosomal protein S10 [Helicoverpa armigera]
0.001319	0.0357157	1	1.77607	3.93734	1.16119	Har_00025062	Har_00025062	gi|2133676|pir||S70430hypothetical protein 4 - fruit fly (Drosophila melanogaster) retrotransposon mgd1
0.000424	0.0200767	1	3.68683	1.25621	0.645196	Har_00213922	Har_00213922	na
0.000265	0.0159777	1	0.996395	2.21823	0.856432	Har_00055093	Har_00055093	gi|110755171|ref|XP_001120773.1|PREDICTED: similar to CG17266-PA [Apis mellifera]
0.000842	0.0277921	1	1.19231	3.144	0.715409	Har_00178491	Har_00178491	na
4.1e-05	0.00715838	1	1.54821	3.20026	1.09999	Har_00114315	Har_00114315	gi|112982910|ref|NP_001037680.1|ribosomal protein S28 [Bombyx mori] >gi|51316656|sp|Q6PS50|RS28_BOMMO 40S ribosomal protein S28 >gi|51316899|sp|Q962Q2|RS28_SPOFR 40S ribosomal protein S28 >gi|52000788|sp|Q6EV21|RS28_PAPDA 40S ribosomal protein S28 >g
0.002538	0.0495332	1	1.21699	2.87384	0.78709	Har_00057489	Har_00057489	gi|114052002|ref|NP_001040446.1|U2 small nuclear ribonucleoprotein A' [Bombyx mori] >gi|95102924|gb|ABF51403.1| U2 small nuclear ribonucleoprotein A' [Bombyx mori]
0.000104	0.0101574	1	1.60639	3.3813	0.882513	Har_00103230	Har_00103230	gi|54609197|gb|AAV34814.1|ribosomal protein L5 [Bombyx mori]
0.002026	0.0444305	1	1.19502	2.76278	0.793152	Har_00232344	Har_00232344	na
2e-06	0.00210326	1	1.14666	2.72558	0.770908	Har_00007544	Har_00007544	gi|157115782|ref|XP_001652694.1|hypothetical protein AaeL_AAEL007342 [Aedes aegypti] >gi|108876762|gb|EAT40987.1| conserved hypothetical protein [Aedes aegypti]
0.001162	0.0332357	1	1.693	3.38862	1.09324	Har_00231809	Har_00231809	na
0.0001	0.0100938	1	1.64056	7.20907	0.416075	Har_00058095	Har_00058095	na
0.000158	0.0126233	1	1.50685	3.18427	0.864603	Har_00026617	Har_00026617	gi|148298880|ref|NP_001091805.1|hypothetical protein LOC778510 [Bombyx mori] >gi|116272513|gb|ABJ97192.1| hypothetical protein [Bombyx mori]
0.000104	0.0101574	1	1.92638	4.30854	1.22475	Har_00001976	Har_00001976	gi|171194343|gb|ACB45330.1|RpL29 [Helicoverpa armigera] >gi|171194345|gb|ACB45331.1| RpL29 [Helicoverpa armigera] >gi|171194347|gb|ACB45332.1| RpL29 [Helicoverpa armigera] >gi|171194351|gb|ACB45334.1| RpL29 [Helicoverpa armigera] >gi|171194353|gb|ACB
0.000156	0.0126102	1	1.46956	3.07582	0.867894	Har_00050295	Har_00050295	gi|113866028|ref|NP_001038957.1|ubiquinol-cytochrome C reductase complex 14kD subunit [Bombyx mori] >gi|103058102|gb|ABF71568.1| ubiquinol-cytochrome C reductase complex 14kD subunit [Bombyx mori]
9.7e-05	0.00999166	1	1.6056	3.29519	0.882887	Har_00001594	Har_00001594	na
0.000623	0.0241613	1	1.03364	2.31223	0.80243	Har_00044823	Har_00044823	gi|114051243|ref|NP_001040382.1|FK506-binding protein [Bombyx mori] >gi|95102696|gb|ABF51286.1| FK506-binding protein [Bombyx mori]
0.001407	0.0367985	1	0.88478	2.35463	0.860251	Har_00055903	Har_00055903	gi|91075958|ref|XP_968943.1|PREDICTED: similar to leprecan 1 [Tribolium castaneum]
0.000741	0.0262602	1	1.5139	3.36602	1.24113	Har_00022901	Har_00022901	gi|158285767|ref|XP_001687945.1|AGAP007380-PA [Anopheles gambiae str. PEST] >gi|157020151|gb|EDO64594.1| AGAP007380-PA [Anopheles gambiae str. PEST]
0.000584	0.0234742	1	1.52584	3.64968	0.740995	Har_00079365	Har_00079365	na
0.000413	0.0198258	1	1.36924	3.74283	0.646795	Har_00125095	Har_00125095	na
0.002003	0.0441622	1	0.759762	2.82704	0.822809	Har_00073830	Har_00073830	gi|124109902|gb|ABM91320.1|integrin beta 1 precursor [Ostrinia furnacalis]
0.0004	0.0193248	1	1.97958	3.99798	1.14495	Har_00109477	Har_00109477	gi|30692103|gb|AAP33177.1|peritrophin 1 [Mamestra configurata]
0.000198	0.0137114	1	1.11176	2.53779	0.771795	-	GE_BrightCorner	na
0.001914	0.0432539	1	2.61281	1.39732	1.06365	Har_00064990	Har_00064990	gi|157107319|ref|XP_001649724.1|3-2trans-enoyl-CoA isomerase, putative [Aedes aegypti] >gi|108879601|gb|EAT43826.1| 3-2trans-enoyl-CoA isomerase, putative [Aedes aegypti]
0.001635	0.0399215	1	1.50682	3.28288	1.2403	Har_00107780	Har_00107780	gi|212507995|gb|EEB11814.1|collagen alpha-1, IV, chain precursor, putative [Pediculus humanus corporis]
0.001711	0.0410023	1	0.992865	2.07465	0.849137	Har_00015727	Har_00015727	gi|219506755|ref|XP_002249450.1|hypothetical protein BRAFLDRAFT_111519 [Branchiostoma floridae] >gi|210082329|gb|EEA31056.1| hypothetical protein BRAFLDRAFT_111519 [Branchiostoma floridae]
8.9e-05	0.00972121	1	1.66144	3.25698	1.12502	Har_00224065	Har_00224065	gi|116786203|gb|ABK24019.1|unknown [Picea sitchensis]
0.000607	0.0238683	1	0.539031	0.72255	4.45739	Har_00035383	Har_00035383	gi|167524218|ref|XP_001746445.1|hypothetical protein [Monosiga brevicollis MX1] >gi|163775207|gb|EDQ88832.1| predicted protein [Monosiga brevicollis MX1]
0.001335	0.0358059	1	1.41098	2.56765	0.953517	Har_00078048	Har_00078048	gi|15213764|gb|AAK92157.1|AF400185_1ribosomal protein L14 [Spodoptera frugiperda]
0.000172	0.0130602	1	1.58166	2.88932	0.949454	Har_00068538	Har_00068538	gi|31340318|sp|Q962U0|RL13A_SPOFR60S ribosomal protein L13A >gi|15213762|gb|AAK92156.1|AF400184_1 ribosomal protein L13A [Spodoptera frugiperda]
0.000515	0.0221793	1	1.52001	2.96335	0.8868	Har_00010738	Har_00010738	gi|114051372|ref|NP_001040316.1|NADH dehydrogenase (ubiquinone) Fe-S protein 8 [Bombyx mori] >gi|87248369|gb|ABD36237.1| NADH dehydrogenase (ubiquinone) Fe-S protein 8 [Bombyx mori]
0.000139	0.0120877	1	2.71042	1.16296	1.35277	Har_00072865	Har_00072865	gi|103058188|gb|ABF71571.1|AMP-binding enzyme [Bombyx mori]
5.7e-05	0.00798	1	4.09868	1.88895	1.26028	Har_00077112	Har_00077112	gi|116792880|gb|ABK26539.1|unknown [Picea sitchensis]
0.000445	0.0205756	1	1.38579	2.45161	1.03287	Har_00050042	Har_00050042	gi|15213774|gb|AAK92162.1|AF400190_1ribosomal protein L26 [Spodoptera frugiperda]
4.5e-05	0.00734621	1	1.27211	2.65319	0.821197	Har_00198954	Har_00198954	na
0.001925	0.0433508	1	0.766467	2.79535	0.793077	Har_00034255	Har_00034255	gi|148906088|gb|ABR16203.1|unknown [Picea sitchensis]
0.002469	0.0488384	1	1.15733	3.10456	1.57898	Har_00208918	Har_00208918	na
0.000201	0.0138134	1	2.24168	0.891445	1.18383	Har_00017391	Har_00017391	gi|156550737|ref|XP_001606071.1|PREDICTED: similar to GM14009p [Nasonia vitripennis]
0.002175	0.0460884	1	1.33408	2.833	0.794539	Har_00056460	Har_00056460	gi|115746760|ref|XP_794132.2|PREDICTED: similar to putative reverse transcriptase [Strongylocentrotus purpuratus] >gi|115963240|ref|XP_001188045.1| PREDICTED: similar to putative reverse transcriptase [Strongylocentrotus purpuratus]
0.000895	0.0288261	1	1.26507	3.45664	0.614541	Har_00086176	Har_00086176	gi|189234848|ref|XP_972516.2|PREDICTED: similar to CG14903 CG14903-PA [Tribolium castaneum]
0.000111	0.0107482	1	1.79907	3.35744	0.895466	Har_00072048	Har_00072048	gi|54039446|sp|Q95V31|RS16_SPOFR40S ribosomal protein S16 >gi|16566734|gb|AAL26583.1|AF429981_1 ribosomal protein S16 [Spodoptera frugiperda]
0.000578	0.0233785	1	1.54561	3.04038	1.17731	Har_00064962	Har_00064962	gi|151301059|ref|NP_001093091.1|H+ transporting ATP synthase delta subunit [Bombyx mori] >gi|95102732|gb|ABF51307.1| H+ transporting ATP synthase delta subunit [Bombyx mori]
0.000182	0.0133172	1	3.6757	1.98766	1.10892	Har_00037604	Har_00037604	gi|114051590|ref|NP_001040355.1|cellular retinaldehyde-binding protein [Bombyx mori] >gi|95102616|gb|ABF51246.1| cellular retinaldehyde-binding protein [Bombyx mori]
0.001034	0.0311188	1	0.998774	2.15941	0.768347	Har_00016037	Har_00016037	gi|148298707|ref|NP_001091800.1|hypothetical protein LOC778505 [Bombyx mori] >gi|116272503|gb|ABJ97187.1| hypothetical protein [Bombyx mori]
0.001413	0.0368488	1	1.11692	2.8036	0.657294	Har_00221577	Har_00221577	na
9.4e-05	0.00994421	1	1.91465	3.94718	0.792922	Har_00029365	Har_00029365	gi|114050837|ref|NP_001040409.1|eukaryotic translation initiation factor 4E-binding protein 2 [Bombyx mori] >gi|95102784|gb|ABF51333.1| eukaryotic translation initiation factor 4E-binding protein 2 [Bombyx mori]
0.001473	0.037611	1	1.59461	3.07122	1.18945	Har_00038062	Har_00038062	gi|54609197|gb|AAV34814.1|ribosomal protein L5 [Bombyx mori]
0.000513	0.0221354	1	1.30248	2.39583	1.13915	Har_00058174	Har_00058174	gi|124256272|gb|ABM92916.1|cyclophilin A [Argopecten irradians]
0.000498	0.0218636	1	1.18519	2.64202	0.723457	Har_00014487	Har_00014487	gi|183979315|dbj|BAG30754.1|DEAD box polypeptide 5 [Papilio xuthus]
0.000547	0.0227136	1	1.44528	2.6971	0.858339	Har_00047363	Har_00047363	gi|194769977|ref|XP_001967076.1|GF21711 [Drosophila ananassae] >gi|190622871|gb|EDV38395.1| GF21711 [Drosophila ananassae]
0.001017	0.0309784	1	1.86166	3.37378	1.13218	Har_00034607	Har_00034607	gi|91091864|ref|XP_968949.1|PREDICTED: similar to NADH-ubiquinone oxidoreductase ashi subunit [Tribolium castaneum]
0.00013	0.011572	1	0.500392	0.788346	4.04297	Har_00076173	Har_00076173	gi|7862150|gb|AAF70499.1|AF255341_13-dehydroecdysone 3alpha-reductase [Spodoptera littoralis]
0.000576	0.0233785	1	1.22167	2.17864	0.884827	Har_00121519	Har_00121519	gi|114051374|ref|NP_001040317.1|NADH-ubiquinone oxidoreductase subunit B14.7 [Bombyx mori] >gi|87248379|gb|ABD36242.1| NADH-ubiquinone oxidoreductase subunit B14.7 [Bombyx mori]
7e-06	0.00329729	1	1.54739	2.44044	1.00004	Har_00061128	Har_00061128	gi|87248663|gb|ABD36384.1|transmembrane BAX inhibitor motif-containing protein 5 [Bombyx mori]
0.000176	0.0131767	1	0.85702	2.08719	1.1361	Har_00120694	Har_00120694	gi|87248363|gb|ABD36234.1|ribosomal protein L41 [Bombyx mori]
0.001651	0.040182	1	1.80005	4.60098	0.615739	Har_00131225	Har_00131225	na
0.000812	0.0272798	1	1.5228	2.5753	1.07596	Har_00031809	Har_00031809	gi|170052881|ref|XP_001862423.1|conserved hypothetical protein [Culex quinquefasciatus] >gi|167873645|gb|EDS37028.1| conserved hypothetical protein [Culex quinquefasciatus]
0.000303	0.016874	1	1.28929	2.05959	0.979291	Har_00073623	Har_00073623	gi|15213840|gb|AAK92195.1|AF400223_1ribosomal protein S27 [Spodoptera frugiperda]
0.00049	0.0216596	1	1.6486	2.82895	1.09699	Har_00056245	Har_00056245	gi|164448660|ref|NP_001106742.1|cytochrome c oxidase polypeptide Vb [Bombyx mori] >gi|95102860|gb|ABF51371.1| cytochrome c oxidase polypeptide Vb [Bombyx mori]
3.5e-05	0.00676368	1	0.895745	2.37792	0.73074	Har_00115416	Har_00115416	gi|91091522|ref|XP_969887.1|PREDICTED: similar to frataxin, mitochondrial [Tribolium castaneum]
0.001492	0.0378185	1	2.24708	1.34554	0.931308	Har_00054637	Har_00054637	gi|114051868|ref|NP_001040436.1|hydroxysteroid dehydrogenase [Bombyx mori] >gi|95102888|gb|ABF51385.1| hydroxysteroid dehydrogenase [Bombyx mori]
0.00131	0.0356213	1	1.43727	2.32183	1.04114	Har_00045809	Har_00045809	gi|15213840|gb|AAK92195.1|AF400223_1ribosomal protein S27 [Spodoptera frugiperda]
6.5e-05	0.00837407	1	1.46549	2.3599	1.04075	Har_00032429	Har_00032429	gi|91083101|ref|XP_969476.1|PREDICTED: similar to MGC88883 protein [Tribolium castaneum]
0.00035	0.0181711	1	1.65698	2.79783	0.91292	Har_00112083	Har_00112083	gi|114052462|ref|NP_001040245.1|glutamate dehydrogenase [Bombyx mori] >gi|87248501|gb|ABD36303.1| glutamate dehydrogenase [Bombyx mori]
0.001014	0.0309784	1	1.37972	2.14205	0.991655	Har_00076671	Har_00076671	gi|194757578|ref|XP_001961041.1|GF11203 [Drosophila ananassae] >gi|190622339|gb|EDV37863.1| GF11203 [Drosophila ananassae]
0.000669	0.0250432	1	1.36338	4.53903	0.461611	Har_00151392	Har_00151392	na
0.001394	0.0366279	1	1.79684	2.86118	1.03698	Har_00072534	Har_00072534	gi|148298804|ref|NP_001091753.1|ribosomal protein L36A [Bombyx mori] >gi|54609267|gb|AAV34849.1| ribosomal protein L36A [Bombyx mori]
2.9e-05	0.00633517	1	0.69878	2.93068	0.749391	Har_00027287	Har_00027287	gi|157115782|ref|XP_001652694.1|hypothetical protein AaeL_AAEL007342 [Aedes aegypti] >gi|108876762|gb|EAT40987.1| conserved hypothetical protein [Aedes aegypti]
0.001139	0.0327435	1	1.47978	2.37868	0.947127	Har_00069332	Har_00069332	gi|91087543|ref|XP_970390.1|PREDICTED: similar to AGAP007621-PB [Tribolium castaneum]
0.002211	0.0463301	1	1.52309	2.49823	1.07772	Har_00049672	Har_00049672	gi|87248177|gb|ABD36141.1|ribosomal protein L27 [Bombyx mori]
0.001696	0.0408377	1	1.06878	2.33929	0.694367	Har_00047495	Har_00047495	gi|114052793|ref|NP_001040276.1|ribosomal protein L7Ae [Bombyx mori] >gi|87248593|gb|ABD36349.1| ribosomal protein L7Ae [Bombyx mori]
0.000619	0.0240681	1	1.76497	3.05705	0.873676	Har_00090276	Har_00090276	gi|189234356|ref|XP_973872.2|PREDICTED: similar to pitchoune CG6375-PB [Tribolium castaneum]
0.000508	0.0220458	1	1.33019	2.29693	0.872635	Har_00057964	Har_00057964	gi|54039495|sp|Q8WQI3.1|RS29_SPOFRRecName: Full=40S ribosomal protein S29 >gi|18253059|gb|AAL62474.1| ribosomal protein S29 [Spodoptera frugiperda] >gi|116833189|gb|ABK29507.1| ribosomal protein S29 [Helicoverpa armigera]
0.00066	0.0249333	1	1.07078	2.96586	0.540917	Har_00210963	Har_00210963	na
0.002077	0.0451765	1	1.31371	2.42694	0.804592	Har_00086040	Har_00086040	gi|157136481|ref|XP_001656848.1|hypothetical protein AaeL_AAEL003452 [Aedes aegypti] >gi|108881017|gb|EAT45242.1| conserved hypothetical protein [Aedes aegypti]
0.000963	0.0301154	1	1.33941	2.34776	0.844265	Har_00037233	Har_00037233	gi|58585256|ref|NP_001011654.1|troponin C type IIb [Apis mellifera] >gi|38639841|tpg|DAA01877.1| TPA_inf: troponin C type IIb [Apis mellifera]
0.000928	0.0296148	1	1.42668	2.35948	1.12457	Har_00005096	Har_00005096	gi|156551876|ref|XP_001603428.1|PREDICTED: similar to ENSANGP00000025500 [Nasonia vitripennis]
0.00071	0.0257674	1	1.30578	2.53358	0.754342	Har_00149525	Har_00149525	na
0.000299	0.0168169	1	1.86235	3.64145	1.3416	Har_00109480	Har_00109480	gi|30692103|gb|AAP33177.1|peritrophin 1 [Mamestra configurata]
0.001497	0.0378816	1	1.84393	2.9512	1.1013	Har_00028512	Har_00028512	gi|116786203|gb|ABK24019.1|unknown [Picea sitchensis]
0.000543	0.0227136	1	1.56126	2.57544	1.13601	Har_00069222	Har_00069222	gi|112984008|ref|NP_001037267.1|ribosomal protein S17 [Bombyx mori] >gi|20140135|sp|Q962R2|RS17_SPOFR 40S ribosomal protein S17 >gi|15213822|gb|AAK92186.1|AF400214_1 ribosomal protein S17 [Spodoptera frugiperda] >gi|54609319|gb|AAV34875.1| ribosomal
0.000945	0.0299777	1	1.58103	2.39826	1.04763	Har_00029429	Har_00029429	gi|195963331|ref|NP_001124377.1|lethal(3)neo18 [Bombyx mori] >gi|194147411|gb|ACF33815.1| lethal(3)neo18 [Bombyx mori]
0.001323	0.0357553	1	0.873119	2.19368	0.755351	Har_00115419	Har_00115419	gi|91091522|ref|XP_969887.1|PREDICTED: similar to frataxin, mitochondrial [Tribolium castaneum]
0.000424	0.0200767	1	1.36015	2.28875	0.855399	Har_00010306	Har_00010306	gi|110750112|ref|XP_001121832.1|PREDICTED: similar to CG18661-PA [Apis mellifera]
0.000481	0.0215185	1	1.28058	2.73849	0.667875	Har_00124070	Har_00124070	na
0.001919	0.043302	1	1.65118	2.6145	0.901102	Har_00219022	Har_00219022	na
0.002144	0.0460137	1	0.920634	2.67669	0.577863	Har_00239081	Har_00239081	na
0.00239	0.0482468	1	0.829032	1.7129	2.94142	Har_00101279	Har_00101279	gi|74831719|emb|CAJ30028.1|carboxypeptidase B precursor [Helicoverpa zea]
0.000802	0.0271862	1	0.554892	3.22762	1.26919	Har_00067816	Har_00067816	gi|156540860|ref|XP_001599040.1|PREDICTED: similar to pinball wizard [Nasonia vitripennis]
0.001902	0.0431584	1	1.97373	3.84266	1.38059	Har_00120890	Har_00120890	gi|124295280|gb|ABN04114.1|cytochrome oxidase subunit III [Spodoptera exigua]
0.002255	0.0468402	1	1.46579	2.10751	1.02108	Har_00026678	Har_00026678	gi|148298804|ref|NP_001091753.1|ribosomal protein L36A [Bombyx mori] >gi|54609267|gb|AAV34849.1| ribosomal protein L36A [Bombyx mori]
0.000287	0.0165481	1	1.35096	2.20601	0.86206	Har_00043488	Har_00043488	gi|24418650|sp|Q962T2|RL28_SPOFR60S ribosomal protein L28 >gi|15213778|gb|AAK92164.1|AF400192_1 ribosomal protein L28 [Spodoptera frugiperda]
5.8e-05	0.00804528	1	1.35615	2.5637	0.741585	Har_00050863	Har_00050863	gi|164448652|ref|NP_001106738.1|ubiquinol-cytochrome c reductase [Bombyx mori] >gi|98990259|gb|ABF60225.1| ubiquinol-cytochrome c reductase [Bombyx mori]
0.001541	0.0386704	1	1.73783	3.14963	1.29743	Har_00103638	Har_00103638	gi|114051481|ref|NP_001040300.1|fumarylacetoacetate hydrolase [Bombyx mori] >gi|87248131|gb|ABD36118.1| fumarylacetoacetate hydrolase [Bombyx mori]
0.000698	0.0256357	1	1.44825	2.12729	1.0555	Har_00001587	Har_00001587	gi|116833193|gb|ABK29509.1|ribosomal protein S10 [Helicoverpa armigera]
0.001354	0.0360588	1	1.181	2.29267	0.716613	Har_00198254	Har_00198254	na
0.001241	0.0344705	1	0.733826	2.70367	0.699492	Har_00068357	Har_00068357	gi|157127158|ref|XP_001661061.1|ATP-dependent RNA helicase [Aedes aegypti] >gi|108873026|gb|EAT37251.1| ATP-dependent RNA helicase [Aedes aegypti]
0.000268	0.0161115	1	1.66876	2.90408	1.26108	Har_00082414	Har_00082414	gi|114050917|ref|NP_001040414.1|3-hydroxyacyl-CoA dehydrogenase [Bombyx mori] >gi|95102802|gb|ABF51342.1| 3-hydroxyacyl-CoA dehydrogenase [Bombyx mori]
0.00072	0.0258811	1	1.13395	2.44718	0.638536	Har_00128045	Har_00128045	na
0.001128	0.0325515	1	0.960229	2.54737	0.560789	Har_00181429	Har_00181429	na
0.001736	0.0413603	1	1.39527	5.75644	0.33138	Har_00148309	Har_00148309	na
0.002142	0.0460137	1	1.57381	3.43413	1.59886	Har_00079901	Har_00079901	gi|115723965|ref|XP_001202176.1|PREDICTED: hypothetical protein, partial [Strongylocentrotus purpuratus] >gi|115846811|ref|XP_001199756.1| PREDICTED: hypothetical protein, partial [Strongylocentrotus purpuratus]
0.002103	0.0455231	1	1.45	2.25816	1.14515	Har_00048568	Har_00048568	gi|114051495|ref|NP_001040303.1|NADH-ubiquinone oxidoreductase B8 subunit [Bombyx mori] >gi|87248185|gb|ABD36145.1| NADH-ubiquinone oxidoreductase B8 subunit [Bombyx mori]
0.000551	0.0227962	1	1.4509	2.24305	0.878083	Har_00030624	Har_00030624	gi|62125845|gb|AAX63830.1|ribosomal protein S5 [Trichoplusia ni]
0.001735	0.0413603	1	1.57672	3.68746	1.72581	Har_00106869	Har_00106869	gi|195963353|ref|NP_001124349.1|3-hydroxyisobutyrate dehydrogenase [Bombyx mori] >gi|189345326|gb|ACD92999.1| 3-hydroxyisobutyrate dehydrogenase [Bombyx mori]
0.000894	0.0288261	1	1.42533	2.17336	0.885528	Har_00040159	Har_00040159	gi|18253047|gb|AAL62468.1|ribosomal protein L3 [Spodoptera frugiperda]
0.000737	0.0262006	1	1.37033	2.41324	0.762792	Har_00059742	Har_00059742	gi|194766896|ref|XP_001965560.1|GF22558 [Drosophila ananassae] >gi|190619551|gb|EDV35075.1| GF22558 [Drosophila ananassae]
0.000798	0.0271116	1	1.75101	2.64139	0.887538	Har_00016702	Har_00016702	gi|193795848|gb|ACF21977.1|paramyosin [Bombyx mandarina]
0.000292	0.0166091	1	1.39396	4.2708	0.436886	Har_00045278	Har_00045278	na
0.000388	0.0190503	1	1.51833	2.25009	1.11233	Har_00048234	Har_00048234	gi|18253053|gb|AAL62471.1|ribosomal protein L34 [Spodoptera frugiperda]
0.002443	0.0485961	1	0.996243	4.7138	0.283091	Har_00072571	Har_00072571	gi|198463716|ref|XP_001352921.2|GA14810 [Drosophila pseudoobscura pseudoobscura] >gi|198151380|gb|EAL30422.2| GA14810 [Drosophila pseudoobscura pseudoobscura]
0.001054	0.0314392	1	1.55754	2.09573	1.01637	Har_00084614	Har_00084614	gi|156551876|ref|XP_001603428.1|PREDICTED: similar to ENSANGP00000025500 [Nasonia vitripennis]
0.001152	0.0330333	1	1.19567	2.65711	0.594426	Har_00117852	Har_00117852	gi|157123473|ref|XP_001660161.1|glucosamine-fructose-6-phosphate aminotransferase [Aedes aegypti] >gi|15150351|gb|AAK85407.1|AF399921_1 glucosamine-fructose-6-phosphate aminotransferase [Aedes aegypti] >gi|15150353|gb|AAK85408.1|AF399922_1 glucosamin
0.000568	0.0232432	1	1.65314	2.93043	1.35705	Har_00096609	Har_00096609	gi|212509197|gb|EEB12659.1|hypothetical protein Phum_PHUM196250 [Pediculus humanus corporis]
2.9e-05	0.00633517	1	1.26547	2.03533	0.807895	Har_00002463	Har_00002463	gi|151384885|gb|AAP20934.2|ADP/ATP translocase [Helicoverpa armigera]
0.001498	0.0378857	1	0.926511	2.64517	0.527455	Har_00230858	Har_00230858	na
0.00157	0.0391375	1	0.824516	2.637	0.592456	Har_00066287	Har_00066287	gi|195133402|ref|XP_002011128.1|GI16373 [Drosophila mojavensis] >gi|193907103|gb|EDW05970.1| GI16373 [Drosophila mojavensis]
0.000103	0.0101574	1	1.42697	2.79616	0.656542	Har_00113846	Har_00113846	gi|195326249|ref|XP_002029842.1|GM25129 [Drosophila sechellia] >gi|194118785|gb|EDW40828.1| GM25129 [Drosophila sechellia]
0.00031	0.0170954	1	0.911838	2.40936	0.581923	Har_00021861	Har_00021861	gi|195389875|ref|XP_002053599.1|GJ23259 [Drosophila virilis] >gi|194151685|gb|EDW67119.1| GJ23259 [Drosophila virilis]
0.001347	0.0359359	1	2.71713	1.61557	1.32295	Har_00172645	Har_00172645	na
0.000613	0.0239999	1	1.46705	3.00106	0.620011	Har_00001266	Har_00001266	gi|183979315|dbj|BAG30754.1|DEAD box polypeptide 5 [Papilio xuthus]
0.000588	0.0235096	1	3.19224	1.58831	0.630317	Har_00004249	Har_00004249	gi|20799417|gb|AAM28482.1|AF482907_1acyl-CoA desaturase HassKSVE [Helicoverpa assulta]
0.001333	0.0357734	1	1.93017	2.87436	1.18264	Har_00112084	Har_00112084	gi|114052462|ref|NP_001040245.1|glutamate dehydrogenase [Bombyx mori] >gi|87248501|gb|ABD36303.1| glutamate dehydrogenase [Bombyx mori]
0.001001	0.0307927	1	4.15107	1.73405	1.90595	Har_00084552	Har_00084552	gi|148908687|gb|ABR17451.1|unknown [Picea sitchensis]
0.001097	0.0320126	1	0.960675	2.85152	0.456526	Har_00152294	Har_00152294	na
0.000116	0.0109969	1	1.3208	2.11299	0.778657	Har_00069946	Har_00069946	gi|164448652|ref|NP_001106738.1|ubiquinol-cytochrome c reductase [Bombyx mori] >gi|98990259|gb|ABF60225.1| ubiquinol-cytochrome c reductase [Bombyx mori]
0.000482	0.0215185	1	1.34622	3.35037	0.499588	Har_00221131	Har_00221131	na
0.000277	0.0163952	1	1.54233	2.02729	0.942451	Har_00074277	Har_00074277	gi|15213788|gb|AAK92169.1|AF400197_1ribosomal protein L35A [Spodoptera frugiperda]
0.001826	0.0425189	1	1.67631	2.20741	1.07545	Har_00030548	Har_00030548	gi|91087131|ref|XP_975238.1|PREDICTED: similar to trifunctional enzyme beta subunit (tp-beta) [Tribolium castaneum]
3.5e-05	0.00676368	1	1.59786	2.27679	1.16565	Har_00057608	Har_00057608	gi|158285614|ref|XP_308397.4|AGAP007475-PA [Anopheles gambiae str. PEST] >gi|157020077|gb|EAA04619.4| AGAP007475-PA [Anopheles gambiae str. PEST]
0.000461	0.0208882	1	2.50447	1.84677	1.12542	Har_00229567	Har_00229567	na
0.001258	0.034687	1	2.98144	1.29894	1.90792	Har_00211883	Har_00211883	na
0.001215	0.0339639	1	1.46646	2.44357	0.721446	Har_00065140	Har_00065140	na
0.002116	0.0456515	1	2.78929	1.69438	1.3763	Har_00093086	Har_00093086	gi|112983040|ref|NP_001037071.1|chlorophyllide A binding protein precursor [Bombyx mori] >gi|82940307|emb|CAJ34654.1| chlorophyllide A binding protein precursor [Bombyx mori]
0.000306	0.0169575	1	1.26685	4.08881	0.362457	Har_00020057	Har_00020057	gi|195963337|ref|NP_001124380.1|glycoprotein hormone beta subunit-related protein [Bombyx mori] >gi|194072589|dbj|BAG55001.1| glycoprotein hormone beta subunit-related protein [Bombyx mori]
0.000846	0.0278835	1	3.26024	1.68913	1.65439	Har_00077109	Har_00077109	gi|116792880|gb|ABK26539.1|unknown [Picea sitchensis]
0.000366	0.0185752	1	1.77418	2.25125	1.08871	Har_00083966	Har_00083966	gi|112984556|ref|NP_001037360.1|ribosome-associated membrane protein 4 [Bombyx mori] >gi|67866982|gb|AAY82465.1| ribosome-associated membrane protein 4 [Bombyx mori]
0.001324	0.0357553	1	1.92667	2.77349	0.791943	Har_00069828	Har_00069828	gi|153791952|ref|NP_001093270.1|ribosomal protein L24 [Bombyx mori] >gi|95102900|gb|ABF51391.1| ribosomal protein L24 [Bombyx mori]
0.000203	0.0138415	1	1.9058	2.23727	0.969626	Har_00081681	Har_00081681	gi|193652756|ref|XP_001943983.1|PREDICTED: similar to trifunctional enzyme beta subunit (tp-beta) [Acyrthosiphon pisum]
0.002378	0.0481511	1	1.60379	2.07155	1.14031	Har_00083916	Har_00083916	gi|112984556|ref|NP_001037360.1|ribosome-associated membrane protein 4 [Bombyx mori] >gi|67866982|gb|AAY82465.1| ribosome-associated membrane protein 4 [Bombyx mori]
0.002203	0.0463301	1	0.811065	2.12526	0.652785	Har_00012293	Har_00012293	gi|4467095|emb|CAB37529.1|putative protein [Arabidopsis thaliana] >gi|7270772|emb|CAB80454.1| putative protein [Arabidopsis thaliana]
0.0001	0.0100938	1	0.804063	2.30585	0.601135	Har_00007720	Har_00007720	gi|193678801|ref|XP_001952383.1|PREDICTED: similar to almondex CG12127-PA [Acyrthosiphon pisum]
0.002298	0.0473175	1	0.757433	0.520691	2.81889	Har_00002576	Har_00002576	gi|110832052|gb|ABH01180.1|cytochrome P450 [Helicoverpa armigera]
0.000756	0.0264191	1	0.827809	2.28086	0.588111	Har_00021152	Har_00021152	gi|189236763|ref|XP_975380.2|PREDICTED: similar to YLP motif containing 1 [Tribolium castaneum]
0.0002	0.0137656	1	2.2984	1.97989	1.05344	Har_00093244	Har_00093244	gi|218436706|dbj|BAH03386.1|putative acetyl transferase [Ostrinia scapulalis]
0.000223	0.0144471	1	1.82013	2.58869	1.29194	Har_00048481	Har_00048481	gi|170033818|ref|XP_001844773.1|gamma-glutamyltranspeptidase 1 [Culex quinquefasciatus] >gi|167874850|gb|EDS38233.1| gamma-glutamyltranspeptidase 1 [Culex quinquefasciatus]
0.000569	0.0232432	1	1.20942	2.92183	0.446014	Har_00077325	Har_00077325	gi|157129583|ref|XP_001661736.1|hypothetical protein AaeL_AAEL011533 [Aedes aegypti] >gi|108872153|gb|EAT36378.1| hypothetical protein AaeL_AAEL011533 [Aedes aegypti]
7.1e-05	0.00882039	1	1.76298	2.53448	0.747865	Har_00044735	Har_00044735	gi|116090821|gb|ABJ55992.1|ribosomal protein S3 [Ostrinia nubilalis]
0.00221	0.0463301	1	1.75401	2.67578	1.42888	Har_00064926	Har_00064926	gi|195115116|ref|XP_002002110.1|GI17203 [Drosophila mojavensis] >gi|193912685|gb|EDW11552.1| GI17203 [Drosophila mojavensis]
0.001898	0.0431511	1	1.53376	0.773215	2.08506	Har_00018597	Har_00018597	gi|156550147|ref|XP_001606081.1|PREDICTED: similar to ENSANGP00000006233 [Nasonia vitripennis]
0.001373	0.0364147	1	0.997715	2.64266	0.396164	Har_00206955	Har_00206955	na
0.001769	0.0417288	1	1.78795	2.14738	1.15175	Har_00090215	Har_00090215	gi|151384885|gb|AAP20934.2|ADP/ATP translocase [Helicoverpa armigera]
0.002477	0.0488865	1	1.29633	2.99262	0.45146	Har_00134403	Har_00134403	na
0.001264	0.0347804	1	2.17296	1.35873	1.54341	Har_00020201	Har_00020201	gi|157124904|ref|XP_001660580.1|cytochrome B5 (cytb5) [Aedes aegypti] >gi|108873820|gb|EAT38045.1| cytochrome B5 (cytb5) [Aedes aegypti]
0.000416	0.0199064	1	2.10457	0.722001	1.47053	Har_00017393	Har_00017393	gi|156550737|ref|XP_001606071.1|PREDICTED: similar to GM14009p [Nasonia vitripennis]
0.000614	0.0240182	1	1.22688	0.47288	2.67564	Har_00023524	Har_00023524	gi|66561006|ref|XP_624968.1|PREDICTED: similar to CG32795-PB, isoform B [Apis mellifera]
0.000529	0.0225248	1	0.969444	2.06367	0.509679	Har_00097512	Har_00097512	gi|193617863|ref|XP_001942753.1|PREDICTED: similar to Uncharacterized protein ZK1236.4 [Acyrthosiphon pisum]
0.000366	0.0185752	1	1.62923	2.83	1.70998	Har_00024163	Har_00024163	gi|171740913|gb|ACB54951.1|polycalin [Helicoverpa armigera]
0.001005	0.0308318	1	1.87064	2.9602	1.57168	Har_00024333	Har_00024333	gi|124295603|gb|ABN04204.1|fat body aminopeptidase [Spodoptera litura]
0.000314	0.0171694	1	1.3174	2.11816	0.623975	Har_00059745	Har_00059745	gi|194766896|ref|XP_001965560.1|GF22558 [Drosophila ananassae] >gi|190619551|gb|EDV35075.1| GF22558 [Drosophila ananassae]
9.8e-05	0.0100035	1	0.743972	2.28151	0.590963	Har_00005088	Har_00005088	gi|91095125|ref|XP_971315.1|PREDICTED: similar to palmitoyl-protein thioesterase [Tribolium castaneum]
0.001091	0.0319527	1	2.11175	1.48428	1.42972	Har_00098540	Har_00098540	gi|116873940|ref|YP_850721.1|alcohol dehydrogenase, zinc-dependent [Listeria welshimeri serovar 6b str. SLCC5334] >gi|116742818|emb|CAK21942.1| unnamed protein product [Listeria welshimeri serovar 6b str. SLCC5334]
0.000251	0.0154846	1	1.75191	2.03699	0.849308	Har_00039639	Har_00039639	gi|116788302|gb|ABK24830.1|unknown [Picea sitchensis]
0.000191	0.0135589	1	2.59755	1.45839	1.80378	Har_00095528	Har_00095528	gi|112983654|ref|NP_001036872.1|Bombyrin [Bombyx mori] >gi|13928531|dbj|BAB47155.1| Bombyrin [Bombyx mori]
0.00101	0.0309223	1	2.54941	1.83221	1.41398	Har_00053878	Har_00053878	gi|157124904|ref|XP_001660580.1|cytochrome B5 (cytb5) [Aedes aegypti] >gi|108873820|gb|EAT38045.1| cytochrome B5 (cytb5) [Aedes aegypti]
0.000143	0.012155	1	1.96793	2.16	1.12187	Har_00001522	Har_00001522	na
0.000543	0.0227136	1	1.63211	2.01449	0.783261	Har_00168458	Har_00168458	na
8.9e-05	0.00972121	1	0.781712	2.02206	0.604012	Har_00224185	Har_00224185	na
0.000716	0.0258606	1	0.615542	0.369386	4.1313	Har_00003855	Har_00003855	gi|13398345|gb|AAK21858.1|acyl-CoA delta-11 desaturase [Helicoverpa zea]
4.2e-05	0.00722144	1	1.94247	2.28216	0.788471	Har_00119644	Har_00119644	gi|183979300|dbj|BAG30761.1|similar to CG6803-PB [Papilio xuthus]
0.000679	0.0252417	1	2.96639	1.97025	1.64794	Har_00118363	Har_00118363	gi|171740901|gb|ACB54945.1|azurocidin-like serine proteinase [Helicoverpa armigera]
0.002469	0.0488384	1	0.741305	0.604628	2.0221	Har_00113803	Har_00113803	gi|157124108|ref|XP_001660334.1|choline/ethanolamine kinase [Aedes aegypti] >gi|108874105|gb|EAT38330.1| choline/ethanolamine kinase [Aedes aegypti]
0.001049	0.0313406	1	0.866495	0.399962	2.56892	Har_00110400	Har_00110400	gi|164459610|gb|ABY57912.1|hydroxypyruvate isomerase [Bombyx mori]
0.000104	0.0101574	1	1.04651	2.87016	0.323981	Har_00230984	Har_00230984	gi|1419220|emb|CAA65618.1|D2145 [Saccharomyces cerevisiae]
0.002408	0.0484172	1	0.728772	2.43097	0.490767	Har_00028971	Har_00028971	gi|115744320|ref|XP_797963.2|PREDICTED: similar to endonuclease-reverse transcriptase [Strongylocentrotus purpuratus] >gi|115930783|ref|XP_001183329.1| PREDICTED: similar to endonuclease-reverse transcriptase [Strongylocentrotus purpuratus]
9.8e-05	0.0100035	1	1.40828	2.34048	0.519934	Har_00041495	Har_00041495	gi|91078908|ref|XP_967303.1|PREDICTED: similar to AGAP006755-PA isoform 1 [Tribolium castaneum]
0.001765	0.0417016	1	1.90373	2.33796	1.42617	Har_00060033	Har_00060033	gi|212508753|gb|EEB12350.1|succinyl-CoA ligase subunit alpha , putative [Pediculus humanus corporis]
0.000389	0.019058	1	0.735736	2.48234	0.469338	Har_00158290	Har_00158290	na
0.001037	0.0311582	1	1.50402	0.341189	3.71665	Har_00058832	Har_00058832	gi|148298685|ref|NP_001091766.1|fructose 1,6-bisphosphate aldolase [Bombyx mori] >gi|95103026|gb|ABF51454.1| fructose 1,6-bisphosphate aldolase [Bombyx mori]
0.002577	0.0498833	1	0.879143	2.14188	0.442037	Har_00039036	Har_00039036	gi|157132518|ref|XP_001656050.1|alcohol dehydrogenase [Aedes aegypti] >gi|108871151|gb|EAT35376.1| alcohol dehydrogenase [Aedes aegypti]
0.001656	0.0402388	1	0.609685	0.357096	3.77984	Har_00036314	Har_00036314	gi|112983134|ref|NP_001036941.1|heat shock protein hsp20.1 [Bombyx mori] >gi|56378319|dbj|BAD74196.1| heat shock protein hsp20.1 [Bombyx mori]
0.00225	0.0468202	1	2.53016	1.86442	1.66857	Har_00091318	Har_00091318	gi|212518622|gb|EEB20357.1|conserved hypothetical protein [Pediculus humanus corporis]
0.002158	0.0460275	1	0.946733	2.2503	0.380118	Har_00009840	Har_00009840	gi|212512969|gb|EEB15619.1|conserved hypothetical protein [Pediculus humanus corporis]
0.000483	0.0215185	1	1.77329	0.361864	3.93674	Har_00016370	Har_00016370	gi|53830708|gb|AAU95197.1|putative fructose 1,6-bisphosphate aldolase [Oncometopia nigricans]
0.001326	0.0357553	1	0.747901	2.21408	0.484595	Har_00032892	Har_00032892	gi|189234848|ref|XP_972516.2|PREDICTED: similar to CG14903 CG14903-PA [Tribolium castaneum]
0.001263	0.0347804	1	0.632549	2.13859	0.587247	-	(+)E1A_r60_a97	na
0.000249	0.0154667	1	0.886677	2.48575	0.36019	Har_00197710	Har_00197710	na
0.000752	0.0263813	1	0.588457	3.13921	0.423746	Har_00009716	Har_00009716	gi|212506668|gb|EEB10801.1|ABC transporter, putative [Pediculus humanus corporis]
0.001518	0.0382418	1	0.693463	2.19684	0.503946	Har_00086548	Har_00086548	gi|219881542|ref|NP_001137388.1|RNA polymerase II subunit 10 [Tribolium castaneum] >gi|58394474|ref|XP_320749.2| AGAP011761-PA [Anopheles gambiae str. PEST] >gi|110749402|ref|XP_001119937.1| PREDICTED: similar to DNA-directed RNA polymerase II 7.6 kD
0.00222	0.0464546	1	0.854226	2.44481	0.342252	Har_00190592	Har_00190592	na
0.002444	0.0485961	1	1.12475	3.7797	0.206089	Har_00125453	Har_00125453	na
0.000338	0.0178347	1	1.43516	2.25695	0.425418	Har_00023009	Har_00023009	gi|212508752|gb|EEB12349.1|conserved hypothetical protein [Pediculus humanus corporis]
0.00254	0.049549	1	0.806966	2.69241	0.300849	Har_00241013	Har_00241013	na
0.000563	0.0231234	1	0.963482	2.39491	0.282431	Har_00035252	Har_00035252	gi|110767819|ref|XP_393546.3|PREDICTED: similar to Shaker cognate b CG1066-PA, isoform A [Apis mellifera]
0.001869	0.0429464	1	1.11422	3.64069	0.1915	Har_00181400	Har_00181400	na
0.002208	0.0463301	1	0.770857	0.364296	2.11326	Har_00106541	Har_00106541	gi|114051191|ref|NP_001040386.1|peroxiredoxin [Bombyx mori] >gi|95102710|gb|ABF51296.1| peroxiredoxin [Bombyx mori]
0.000312	0.0171221	1	1.25548	1.01895	0.722495	Har_00112433	Har_00112433	gi|156537745|ref|XP_001607990.1|PREDICTED: similar to aconitase, mitochondrial [Nasonia vitripennis]
0.000864	0.0282707	1	1.05818	0.596705	0.986445	Har_00096663	Har_00096663	gi|67463961|pdb|1Z6O|MChain M, Crystal Structure Of Trichoplusia Ni Secreted Ferritin >gi|67463962|pdb|1Z6O|N Chain N, Crystal Structure Of Trichoplusia Ni Secreted Ferritin >gi|67463963|pdb|1Z6O|O Chain O, Crystal Structure Of Trichoplusia Ni Secret
0.000725	0.0259988	1	0.742849	2.09213	0.356442	Har_00129383	Har_00129383	na
0.00101	0.0309223	1	0.675024	2.15876	0.373852	Har_00136602	Har_00136602	na
0.002329	0.0476549	1	0.761064	2.19567	0.324525	Har_00159799	Har_00159799	na
0.001531	0.0384835	1	0.758489	2.03315	0.34781	Har_00009582	Har_00009582	gi|91086165|ref|XP_970259.1|PREDICTED: similar to GA17483-PA [Tribolium castaneum]
0.000874	0.0284948	1	1.16823	0.63187	0.990563	Har_00065613	Har_00065613	gi|67463961|pdb|1Z6O|MChain M, Crystal Structure Of Trichoplusia Ni Secreted Ferritin >gi|67463962|pdb|1Z6O|N Chain N, Crystal Structure Of Trichoplusia Ni Secreted Ferritin >gi|67463963|pdb|1Z6O|O Chain O, Crystal Structure Of Trichoplusia Ni Secret
0.000348	0.0181088	1	0.761226	0.699855	0.992544	Har_00116295	Har_00116295	gi|91090964|ref|XP_974653.1|PREDICTED: similar to AGAP003648-PA [Tribolium castaneum]
0.00042	0.0200131	1	0.77781	5.10213	0.132118	-	DCP_20_0	na
0.000781	0.0268365	1	1.16601	1.3851	0.846589	Har_00012405	Har_00012405	gi|91083975|ref|XP_975160.1|PREDICTED: similar to AGAP007519-PA [Tribolium castaneum]
0.001412	0.0368488	1	0.93674	3.41544	0.162896	Har_00157490	Har_00157490	na
0.001932	0.043422	1	1.03017	0.581935	1.08424	Har_00008507	Har_00008507	gi|67463949|pdb|1Z6O|AChain A, Crystal Structure Of Trichoplusia Ni Secreted Ferritin >gi|67463950|pdb|1Z6O|B Chain B, Crystal Structure Of Trichoplusia Ni Secreted Ferritin >gi|67463951|pdb|1Z6O|C Chain C, Crystal Structure Of Trichoplusia Ni Secret
0.000163	0.0127424	1	0.969585	1.22439	0.650486	Har_00083059	Har_00083059	gi|212516595|gb|EEB18589.1|WW domain-binding protein, putative [Pediculus humanus corporis]
0.000142	0.0121385	1	0.75067	2.06025	0.326734	Har_00021349	Har_00021349	gi|194765083|ref|XP_001964657.1|GF22933 [Drosophila ananassae] >gi|190614929|gb|EDV30453.1| GF22933 [Drosophila ananassae]
0.001418	0.0369366	1	0.915213	0.60123	0.913451	Har_00098978	Har_00098978	gi|116784655|gb|ABK23424.1|unknown [Picea sitchensis]
0.002404	0.0484172	1	0.845725	1.07934	0.639156	Har_00147157	Har_00147157	na
0.000558	0.0230016	1	1.14548	3.35021	0.171102	Har_00078520	Har_00078520	gi|12005280|gb|AAG44367.1|AF233590_1gloverin precursor [Trichoplusia ni]
0.000244	0.0152189	1	1.3018	1.25485	0.814801	Har_00006093	Har_00006093	gi|28971712|dbj|BAC65324.1|hypothetical protein [Antheraea yamamai]
0.000681	0.0252417	1	0.825569	0.639737	1.06172	Har_00079304	Har_00079304	gi|157103357|ref|XP_001647944.1|brefeldin A-sensitive peripheral Golgi protein, putative [Aedes aegypti] >gi|108884776|gb|EAT49001.1| brefeldin A-sensitive peripheral Golgi protein, putative [Aedes aegypti]
1.2e-05	0.00444787	1	1.47876	0.317098	2.31744	Har_00189358	Har_00189358	na
0.000718	0.0258811	1	1.13164	0.599354	0.938091	Har_00096665	Har_00096665	gi|67463961|pdb|1Z6O|MChain M, Crystal Structure Of Trichoplusia Ni Secreted Ferritin >gi|67463962|pdb|1Z6O|N Chain N, Crystal Structure Of Trichoplusia Ni Secreted Ferritin >gi|67463963|pdb|1Z6O|O Chain O, Crystal Structure Of Trichoplusia Ni Secret
0.002228	0.0465144	1	1.00289	1.96617	1.02375	Har_00034131	Har_00034131	gi|157704353|gb|ABV68865.1|RPS18 [Trichoplusia ni]
0.000244	0.0152189	1	0.946177	1.21017	0.628058	Har_00120432	Har_00120432	na
0.001834	0.0426174	1	1.0506	1.47268	0.755043	Har_00016808	Har_00016808	gi|212514693|gb|EEB16952.1|Cytospin-A, putative [Pediculus humanus corporis]
0.000295	0.0167167	1	1.11645	1.04826	0.564517	Har_00093919	Har_00093919	gi|158295392|ref|XP_316189.4|AGAP006128-PA [Anopheles gambiae str. PEST] >gi|157016015|gb|EAA11249.5| AGAP006128-PA [Anopheles gambiae str. PEST]
0.000328	0.0175736	1	0.917506	3.69473	0.141897	Har_00089745	Har_00089745	gi|25013881|ref|NP_734292.1|NIb protein [Sweet potato mild mottle virus]
0.002391	0.0482468	1	0.923242	0.520843	0.998919	Har_00193177	Har_00193177	na
0.002573	0.0498505	1	1.06946	0.581354	1.13726	Har_00042684	Har_00042684	gi|56418419|gb|AAV91017.1|hemolymph proteinase 19 [Manduca sexta]
0.002283	0.0472013	1	0.950231	0.573511	0.873016	Har_00042162	Har_00042162	gi|56462290|gb|AAV91428.1|serpin 1 [Lonomia obliqua]
0.002101	0.0455231	1	1.1711	1.67406	1.07421	Har_00083129	Har_00083129	gi|14318169|gb|AAK59928.1|AF379640_1ribosomal protein S11 [Heliothis virescens]
0.002418	0.0484172	1	1.16006	2.77934	0.197906	Har_00143781	Har_00143781	na
0.000507	0.0220236	1	1.21304	1.15542	0.662641	Har_00096697	Har_00096697	gi|148298695|ref|NP_001091823.1|poly A binding protein [Bombyx mori] >gi|111608107|gb|ABH10797.1| poly A binding protein [Bombyx mori]
0.000635	0.0244557	1	1.22269	0.961774	0.597583	Har_00032382	Har_00032382	gi|157136400|ref|XP_001663738.1|uncoordinated protein [Aedes aegypti] >gi|108869947|gb|EAT34172.1| uncoordinated protein [Aedes aegypti]
0.001269	0.0347994	1	0.978341	0.503998	0.93906	Har_00039699	Har_00039699	gi|163838684|ref|NP_001106225.1|ubiquinol-cytochrome c reductase core protein II [Bombyx mori] >gi|87248249|gb|ABD36177.1| ubiquinol-cytochrome c reductase core protein II [Bombyx mori]
0.001439	0.0371838	1	1.00954	1.58209	0.732178	Har_00022810	Har_00022810	gi|112983074|ref|NP_001036940.1|Replication protein A small subunit [Bombyx mori] >gi|55700852|dbj|BAD69791.1| Replication protein A small subunit [Bombyx mori]
0.001275	0.0349216	1	1.0093	1.68892	0.776711	Har_00205732	Har_00205732	na
0.000533	0.0225465	1	0.903515	0.518682	1.03033	Har_00032741	Har_00032741	gi|114051374|ref|NP_001040317.1|NADH-ubiquinone oxidoreductase subunit B14.7 [Bombyx mori] >gi|87248379|gb|ABD36242.1| NADH-ubiquinone oxidoreductase subunit B14.7 [Bombyx mori]
0.000832	0.0276234	1	1.06984	0.588535	1.21431	Har_00068221	Har_00068221	gi|220028649|gb|ACL77780.1|ATP synthase b [Spodoptera exigua]
0.001113	0.0322008	1	1.07698	1.03824	0.501121	Har_00032522	Har_00032522	gi|170038512|ref|XP_001847093.1|gp150 protein [Culex quinquefasciatus] >gi|167882236|gb|EDS45619.1| gp150 protein [Culex quinquefasciatus]
0.001505	0.0380202	1	0.815157	0.64696	0.848284	Har_00227943	Har_00227943	gi|134001215|gb|ABO45231.1|reverse transcriptase [Ostrinia nubilalis] >gi|134001296|gb|ABO45237.1| reverse transcriptase [Ostrinia nubilalis]
0.002483	0.0489243	1	1.24772	0.853896	0.652145	Har_00032383	Har_00032383	gi|157136400|ref|XP_001663738.1|uncoordinated protein [Aedes aegypti] >gi|108869947|gb|EAT34172.1| uncoordinated protein [Aedes aegypti]
0.001585	0.0394245	1	0.784432	0.781019	1.38057	Har_00100804	Har_00100804	gi|158301316|ref|XP_321028.4|AGAP002026-PA [Anopheles gambiae str. PEST] >gi|157012412|gb|EAA01246.5| AGAP002026-PA [Anopheles gambiae str. PEST]
0.000444	0.0205714	1	1.2499	1.45061	0.800981	Har_00202938	Har_00202938	na
8.3e-05	0.00938315	1	1.06673	0.485543	1.03138	Har_00044177	Har_00044177	gi|62722856|gb|AAX94729.1|ferritin light chain [Trichoplusia ni]
0.001777	0.0417868	1	0.927687	1.19508	0.565277	Har_00115074	Har_00115074	gi|170034569|ref|XP_001845146.1|chromodomain helicase DNA binding protein [Culex quinquefasciatus] >gi|167875927|gb|EDS39310.1| chromodomain helicase DNA binding protein [Culex quinquefasciatus]
0.000388	0.0190503	1	0.538351	1.12376	1.09369	Har_00078798	Har_00078798	gi|114051357|ref|NP_001040372.1|transgelin [Bombyx mori] >gi|95102666|gb|ABF51271.1| transgelin [Bombyx mori]
0.000449	0.0206339	1	0.878765	0.956773	0.515064	Har_00100429	Har_00100429	gi|91077136|ref|XP_971386.1|PREDICTED: similar to rCG37751 [Tribolium castaneum]
8e-05	0.00922857	1	0.993108	1.70532	0.741352	Har_00100066	Har_00100066	gi|157123059|ref|XP_001653807.1|mitochondrial ribosomal protein, L33, putative [Aedes aegypti] >gi|108874533|gb|EAT38758.1| mitochondrial ribosomal protein, L33, putative [Aedes aegypti]
0.000949	0.0299993	1	0.840582	1.3118	0.669915	Har_00118290	Har_00118290	gi|157107842|ref|XP_001649963.1|protein farnesyltransferase beta subunit (caax farnesyltransferase beta subunit) (ras proteins prenyltransferase beta) (ftase-beta) [Aedes aegypti] >gi|108879484|gb|EAT43709.1| protein farnesyltransferase beta subunit
0.00177	0.0417307	1	1.02608	1.19335	0.524859	Har_00029970	Har_00029970	gi|148298845|ref|NP_001091768.1|arginine/serine-rich splicing factor 7 [Bombyx mori] >gi|95103084|gb|ABF51483.1| arginine/serine-rich splicing factor 7 [Bombyx mori] >gi|102269217|gb|ABF55972.2| xl6 [Bombyx mori]
0.000213	0.0140406	1	1.02762	0.73561	0.598395	Har_00161735	Har_00161735	na
0.002445	0.0485961	1	1.61277	1.41972	0.977643	Har_00037712	Har_00037712	gi|91076036|ref|XP_972103.1|PREDICTED: similar to Adenylate kinase-2 CG3140-PA [Tribolium castaneum]
0.001517	0.0382418	1	0.865835	0.515937	0.951308	Har_00103743	Har_00103743	gi|114052214|ref|NP_001040229.1|adaptin [Bombyx mori] >gi|87248449|gb|ABD36277.1| adaptin [Bombyx mori]
0.000285	0.0165481	1	0.894008	0.470677	1.00764	Har_00044176	Har_00044176	gi|62722856|gb|AAX94729.1|ferritin light chain [Trichoplusia ni]
0.001308	0.0355883	1	1.01224	2.65159	0.159362	Har_00233329	Har_00233329	na
0.001089	0.0319527	1	1.49968	1.51687	0.946189	Har_00059006	Har_00059006	gi|18253045|gb|AAL62467.1|60S acidic ribosomal protein P2 [Spodoptera frugiperda]
0.001104	0.0320224	1	0.716247	1.49377	0.865725	Har_00114579	Har_00114579	gi|91090444|ref|XP_966925.1|PREDICTED: similar to DNA-directed RNA polymerase II 13.3 kDa polypeptide [Tribolium castaneum]
0.000227	0.0146016	1	0.72419	0.642706	1.12331	Har_00079393	Har_00079393	gi|87248361|gb|ABD36233.1|ribosomal protein S34 [Bombyx mori]
0.002046	0.0446741	1	0.819559	1.34558	0.674159	Har_00112273	Har_00112273	gi|6016425|sp|O76485.1|CSK2B_SPOFRRecName: Full=Casein kinase II subunit beta; Short=CK II beta >gi|3249057|gb|AAC24042.1| casein kinase II beta subunit [Spodoptera frugiperda]
0.002037	0.0445421	1	0.816646	0.587599	0.855441	Har_00216392	Har_00216392	na
0.002088	0.0453503	1	1.48531	1.58961	1.03409	Har_00104822	Har_00104822	gi|87248237|gb|ABD36171.1|hairy cell leukemia protein 1 [Bombyx mori] >gi|221579705|gb|ACM24351.1| TGF-beta-inducible nuclear protein 1 [Bombyx mori]
0.002443	0.0485961	1	1.32871	1.29507	0.704525	Har_00168461	Har_00168461	na
0.000884	0.0286761	1	1.24555	1.65417	0.837813	Har_00047921	Har_00047921	gi|51701837|sp|Q962T1|RL32_SPOFR60S ribosomal protein L32 >gi|15213784|gb|AAK92167.1|AF400195_1 ribosomal protein L32 [Spodoptera frugiperda]
4.9e-05	0.00748574	1	0.798762	0.619085	1.22189	Har_00097094	Har_00097094	gi|110749303|ref|XP_395314.3|PREDICTED: similar to CG12797-PA [Apis mellifera]
0.000362	0.0184968	1	0.787565	0.616363	1.20964	Har_00082090	Har_00082090	gi|112983493|ref|NP_001037526.1|protein kinase c inhibitor [Bombyx mori] >gi|57639625|gb|AAW55666.1| protein kinase c inhibitor [Bombyx mori]
0.000169	0.0129309	1	0.756717	0.585748	0.899171	Har_00011865	Har_00011865	gi|114051996|ref|NP_001040202.1|nonclathrin coat protein zeta 1-COP [Bombyx mori] >gi|87248373|gb|ABD36239.1| nonclathrin coat protein zeta 1-COP [Bombyx mori]
0.002536	0.0495155	1	0.99969	0.751972	0.528187	Har_00062400	Har_00062400	gi|189240860|ref|XP_969570.2|PREDICTED: similar to Putative protein kinase C delta type homolog [Tribolium castaneum]
0.002137	0.0459726	1	0.921886	1.6151	0.694892	Har_00210852	Har_00210852	na
0.00068	0.0252417	1	1.35262	1.63583	0.871303	Har_00010308	Har_00010308	gi|110750112|ref|XP_001121832.1|PREDICTED: similar to CG18661-PA [Apis mellifera]
0.001252	0.0346484	1	1.49511	1.46948	0.8631	Har_00065568	Har_00065568	gi|16566713|gb|AAL26576.1|AF429974_1ribosomal protein L12 [Spodoptera frugiperda]
0.000446	0.0206007	1	0.902257	1.28712	0.55957	Har_00071062	Har_00071062	gi|189031276|gb|ACD74811.1|eukaryotic initiation factor 5C [Helicoverpa armigera]
0.000586	0.0235096	1	0.302308	0.603427	2.14565	Har_00050173	Har_00050173	gi|212512587|gb|EEB15330.1|Microsomal glutathione S-transferase, putative [Pediculus humanus corporis]
0.000557	0.0229813	1	0.965876	0.439413	1.086	Har_00099667	Har_00099667	gi|67463949|pdb|1Z6O|AChain A, Crystal Structure Of Trichoplusia Ni Secreted Ferritin >gi|67463950|pdb|1Z6O|B Chain B, Crystal Structure Of Trichoplusia Ni Secreted Ferritin >gi|67463951|pdb|1Z6O|C Chain C, Crystal Structure Of Trichoplusia Ni Secret
0.00235	0.0478453	1	1.56663	1.65102	0.998871	Har_00038864	Har_00038864	gi|18253057|gb|AAL62473.1|ribosomal protein S27A [Spodoptera frugiperda]
0.000695	0.0255928	1	0.857299	1.40393	0.624832	Har_00117494	Har_00117494	gi|198423331|ref|XP_002121617.1|PREDICTED: similar to CDK5 regulatory subunit associated protein 1-like 1 [Ciona intestinalis]
0.001992	0.0440265	1	1.61965	0.697203	1.12837	Har_00055891	Har_00055891	gi|158292193|ref|XP_313752.4|AGAP004458-PA [Anopheles gambiae str. PEST] >gi|157017319|gb|EAA44590.4| AGAP004458-PA [Anopheles gambiae str. PEST]
0.001844	0.0427838	1	0.81057	0.485922	0.966291	Har_00092133	Har_00092133	gi|189236694|ref|XP_973756.2|PREDICTED: similar to CG8086 CG8086-PD [Tribolium castaneum]
0.001162	0.0332357	1	1.07877	1.477	0.602786	Har_00224339	Har_00224339	na
0.000877	0.0285514	1	0.7836	0.537066	0.897902	Har_00026602	Har_00026602	gi|6560635|gb|AAF16695.1|AF117573_1thioredoxin-like protein [Manduca sexta]
0.001496	0.0378774	1	0.933518	0.433532	1.07426	Har_00008505	Har_00008505	gi|67463949|pdb|1Z6O|AChain A, Crystal Structure Of Trichoplusia Ni Secreted Ferritin >gi|67463950|pdb|1Z6O|B Chain B, Crystal Structure Of Trichoplusia Ni Secreted Ferritin >gi|67463951|pdb|1Z6O|C Chain C, Crystal Structure Of Trichoplusia Ni Secret
0.000522	0.0223319	1	0.943811	0.399055	0.996941	Har_00026719	Har_00026719	gi|67463949|pdb|1Z6O|AChain A, Crystal Structure Of Trichoplusia Ni Secreted Ferritin >gi|67463950|pdb|1Z6O|B Chain B, Crystal Structure Of Trichoplusia Ni Secreted Ferritin >gi|67463951|pdb|1Z6O|C Chain C, Crystal Structure Of Trichoplusia Ni Secret
0.001939	0.0435144	1	1.78726	0.769888	1.1506	Har_00043808	Har_00043808	gi|114052138|ref|NP_001040221.1|troponin T [Bombyx mori] >gi|87248429|gb|ABD36267.1| troponin T [Bombyx mori]
0.001704	0.0409213	1	1.07371	1.81882	0.729517	Har_00105714	Har_00105714	gi|114051628|ref|NP_001040166.1|anaphase promoting complex subunit 10 [Bombyx mori] >gi|87248261|gb|ABD36183.1| anaphase promoting complex subunit 10 [Bombyx mori]
3e-06	0.00233897	1	1.12392	0.60305	1.43937	Har_00005201	Har_00005201	gi|50293095|gb|AAT72922.1|sterol carrier protein 2/3-oxoacyl-CoA thiolase [Spodoptera littoralis]
0.000599	0.0237395	1	0.796599	0.502378	1.07498	Har_00100576	Har_00100576	gi|198246256|gb|ACH82085.1|mitochondrial carnitine/acylcarnitine translocase [Loxostege sticticalis]
0.002271	0.0470644	1	1.06907	1.92296	0.76193	Har_00201046	Har_00201046	na
0.002587	0.0499932	1	1.87782	1.38211	1.03982	Har_00001936	Har_00001936	na
0.000665	0.0250386	1	1.43797	1.74311	1.07782	Har_00044899	Har_00044899	gi|20140134|sp|Q962Q6|RS24_SPOFR40S ribosomal protein S24 >gi|15213834|gb|AAK92192.1|AF400220_1 ribosomal protein S24 [Spodoptera frugiperda]
0.001671	0.0404294	1	0.969587	0.517197	1.36383	Har_00205970	Har_00205970	na
0.000487	0.0215692	1	0.925555	1.33573	0.527465	Har_00101288	Har_00101288	gi|112983906|ref|NP_001036848.1|En10 protein [Bombyx mori] >gi|10801566|dbj|BAB16696.1| EN10 [Bombyx mori]
0.000381	0.0188088	1	1.43876	1.82403	1.0433	Har_00030649	Har_00030649	gi|27260896|gb|AAN86048.1|ribosomal protein S2 [Spodoptera frugiperda]
0.000982	0.0305616	1	0.781038	0.497246	1.0637	Har_00011900	Har_00011900	gi|114052092|ref|NP_001040214.1|signal peptidase complex subunit 2 [Bombyx mori] >gi|87248409|gb|ABD36257.1| signal peptidase complex subunit 2 [Bombyx mori]
0.001125	0.0324856	1	1.428	1.78623	0.927468	Har_00085726	Har_00085726	gi|91092800|ref|XP_974187.1|PREDICTED: similar to vacuolar ATP synthase subunit S1 [Tribolium castaneum]
0.000212	0.0140156	1	1.60407	1.52473	0.884731	Har_00102134	Har_00102134	gi|91076036|ref|XP_972103.1|PREDICTED: similar to Adenylate kinase-2 CG3140-PA [Tribolium castaneum]
0.000135	0.0118768	1	0.729818	0.612421	0.809221	Har_00213417	Har_00213417	na
0.002171	0.0460684	1	0.813351	0.496101	0.89469	Har_00112500	Har_00112500	gi|157105561|ref|XP_001648922.1|pyruvate dehydrogenase [Aedes aegypti] >gi|108880044|gb|EAT44269.1| pyruvate dehydrogenase [Aedes aegypti]
0.000412	0.0197988	1	0.579866	0.785755	0.789057	Har_00026176	Har_00026176	gi|112983808|ref|NP_001037384.1|SNF [Bombyx mori] >gi|76496416|gb|ABA43713.1| SNF [Bombyx mori]
0.000199	0.0137596	1	0.76841	0.640922	1.37177	Har_00029446	Har_00029446	gi|48140594|ref|XP_393519.1|PREDICTED: similar to Fatty acid-binding protein, adipocyte (AFABP) (Adipocyte lipid-binding protein) (ALBP) (A-FABP) [Apis mellifera]
3.9e-05	0.00708265	1	0.57547	0.702853	1.14249	Har_00044324	Har_00044324	gi|45553223|ref|NP_996139.1|CG33290 [Drosophila melanogaster] >gi|41618334|tpg|DAA03106.1| TPA_inf: HDC11369 [Drosophila melanogaster] >gi|45446067|gb|AAS65091.1| CG33290 [Drosophila melanogaster] >gi|157816590|gb|ABV82288.1| IP19829p [Drosophila mel
0.001835	0.0426187	1	1.43892	1.90218	1.03331	Har_00050404	Har_00050404	gi|154091287|gb|ABS57451.1|ribosomal protein L8 [Heliconius melpomene]
0.001768	0.041727	1	1.25425	1.44929	0.639138	Har_00033800	Har_00033800	gi|110756995|ref|XP_001121569.1|PREDICTED: similar to Tetraspanin 2A CG11415-PA [Apis mellifera]
0.002153	0.0460275	1	1.11024	1.55198	0.604959	Har_00182220	Har_00182220	gi|193610883|ref|XP_001947327.1|PREDICTED: similar to arc CG6741-PB, partial [Acyrthosiphon pisum]
0.000252	0.015504	1	1.13744	3.22896	0.123302	Har_00110876	Har_00110876	gi|196002797|ref|XP_002111266.1|hypothetical protein TRIADDRAFT_55030 [Trichoplax adhaerens] >gi|190587217|gb|EDV27270.1| hypothetical protein TRIADDRAFT_55030 [Trichoplax adhaerens]
0.00105	0.0313406	1	0.659205	0.622968	1.17796	Har_00120159	Har_00120159	gi|156550520|ref|XP_001602291.1|PREDICTED: similar to conserved hypothetical protein [Nasonia vitripennis]
0.002119	0.0456724	1	0.716853	0.634908	0.765429	Har_00216044	Har_00216044	na
0.002351	0.0478453	1	1.3827	1.73552	0.834232	Har_00006100	Har_00006100	gi|21362850|sp|Q8WQI7|RL18A_SPOFR60S ribosomal protein L18a >gi|18253051|gb|AAL62470.1| ribosomal protein L18A [Spodoptera frugiperda]
0.002183	0.0461472	1	0.992718	0.358873	0.975573	Har_00080849	Har_00080849	gi|112983400|ref|NP_001036990.1|Hsp40 protein [Bombyx mori] >gi|60592743|dbj|BAD90846.1| Hsp40 [Bombyx mori]
0.000283	0.0165481	1	0.735848	0.484103	0.973647	Har_00230444	Har_00230444	na
0.002408	0.0484172	1	0.727884	0.979902	0.484904	Har_00215401	Har_00215401	na
0.001144	0.0328664	1	0.513206	0.865407	0.77815	Har_00039337	Har_00039337	gi|157104842|ref|XP_001648596.1|hypothetical protein AaeL_AAEL004183 [Aedes aegypti] >gi|108880244|gb|EAT44469.1| conserved hypothetical protein [Aedes aegypti]
0.000237	0.01501	1	1.18579	1.49032	0.609887	Har_00230105	Har_00230105	na
0.000288	0.0165481	1	1.46355	1.8246	0.918079	Har_00072046	Har_00072046	gi|54039446|sp|Q95V31|RS16_SPOFR40S ribosomal protein S16 >gi|16566734|gb|AAL26583.1|AF429981_1 ribosomal protein S16 [Spodoptera frugiperda]
8.2e-05	0.00931668	1	0.692502	1.14217	0.566827	Har_00113325	Har_00113325	gi|170049573|ref|XP_001857542.1|will die slowly [Culex quinquefasciatus] >gi|167871356|gb|EDS34739.1| will die slowly [Culex quinquefasciatus]
0.001731	0.0413065	1	1.76662	0.622869	0.969928	Har_00024630	Har_00024630	gi|164451507|gb|ABY56688.1|troponin I [Loxostege sticticalis]
0.001209	0.0339639	1	0.725386	0.498455	0.943687	Har_00109849	Har_00109849	gi|195118098|ref|XP_002003577.1|GI21901 [Drosophila mojavensis] >gi|195388486|ref|XP_002052911.1| GJ17817 [Drosophila virilis] >gi|193914152|gb|EDW13019.1| GI21901 [Drosophila mojavensis] >gi|194149368|gb|EDW65066.1| GJ17817 [Drosophila virilis]
0.001752	0.0415663	1	0.887396	0.404144	1.05526	Har_00059981	Har_00059981	gi|170045511|ref|XP_001850350.1|vitellogenic carboxypeptidase [Culex quinquefasciatus] >gi|167868524|gb|EDS31907.1| vitellogenic carboxypeptidase [Culex quinquefasciatus]
0.002165	0.0460275	1	0.762526	0.822842	0.541426	Har_00018623	Har_00018623	gi|114051800|ref|NP_001040433.1|eukaryotic translation initiation factor 3 subunit 2 beta [Bombyx mori] >gi|95102872|gb|ABF51377.1| eukaryotic translation initiation factor 3 subunit 2 beta [Bombyx mori]
0.000327	0.0175736	1	0.860541	0.542798	1.37636	Har_00118102	Har_00118102	na
0.001966	0.0436867	1	0.655703	0.523788	1.0138	Har_00051441	Har_00051441	gi|91093575|ref|XP_968639.1|PREDICTED: similar to AGAP011374-PA [Tribolium castaneum]
0.002507	0.0492008	1	0.749489	1.4504	0.654334	Har_00022959	Har_00022959	gi|110756596|ref|XP_395447.3|PREDICTED: similar to Probable ubiquitin carboxyl-terminal hydrolase FAF-X (Ubiquitin thioesterase FAF-X) (Ubiquitin-specific-processing protease FAF-X) (Deubiquitinating enzyme FAF-X) (Fat facets protein-related, X-linke
0.000159	0.0126269	1	0.647159	0.551995	1.05779	Har_00012544	Har_00012544	gi|91089515|ref|XP_970540.1|PREDICTED: similar to AGAP006229-PA [Tribolium castaneum]
1.3e-05	0.004522	1	0.704787	0.498943	1.04284	Har_00146995	Har_00146995	na
7.6e-05	0.00906786	1	0.234244	0.139002	10.3503	Har_00026337	Har_00026337	gi|116794133|gb|ABK27018.1|unknown [Picea sitchensis]
0.000659	0.0249333	1	0.806705	0.416884	1.00333	Har_00050633	Har_00050633	gi|115292423|ref|NP_001041679.1|Arp2/3 complex subunit [Bombyx mori] >gi|113707412|gb|ABI36602.1| Arp2/3 complex subunit [Bombyx mori]
0.001614	0.0397306	1	0.836247	0.61526	0.649379	Har_00191952	Har_00191952	na
0.000983	0.0305717	1	1.52831	1.85144	1.05975	Har_00104990	Har_00104990	gi|87248237|gb|ABD36171.1|hairy cell leukemia protein 1 [Bombyx mori] >gi|221579705|gb|ACM24351.1| TGF-beta-inducible nuclear protein 1 [Bombyx mori]
0.002301	0.0473175	1	0.807822	1.27296	0.524244	Har_00205351	Har_00205351	na
0.000228	0.0146243	1	0.997335	0.425586	1.2791	Har_00047086	Har_00047086	gi|158293426|ref|XP_314766.4|AGAP008667-PA [Anopheles gambiae str. PEST] >gi|157016700|gb|EAA10131.4| AGAP008667-PA [Anopheles gambiae str. PEST]
0.00046	0.0208638	1	1.46353	1.87352	0.909616	Har_00074241	Har_00074241	gi|154091289|gb|ABS57452.1|ribosomal protein L27 [Heliconius melpomene]
0.001421	0.0369722	1	1.39397	0.663159	1.43553	Har_00235616	Har_00235616	na
6.7e-05	0.00853448	1	0.432738	0.952238	0.802715	Har_00054216	Har_00054216	gi|91078838|ref|XP_971511.1|PREDICTED: similar to AGAP007285-PA [Tribolium castaneum]
0.001079	0.031828	1	0.763844	0.460809	1.06867	Har_00119937	Har_00119937	gi|58864720|emb|CAI06088.1|putative annexin IX-C [Manduca sexta]
0.00195	0.0436314	1	1.10238	1.2403	0.449445	Har_00011435	Har_00011435	gi|110756545|ref|XP_001121721.1|PREDICTED: similar to CG33519-PB [Apis mellifera]
0.002163	0.0460275	1	0.662632	0.650175	0.761164	Har_00195894	Har_00195894	na
0.000655	0.0248274	1	0.710772	0.480485	1.04184	Har_00100321	Har_00100321	gi|148298873|ref|NP_001091776.1|putative signal recognition particle 54 kDa protein [Bombyx mori] >gi|111608119|gb|ABH10803.1| putative signal recognition particle 54 kDa protein [Bombyx mori]
0.000428	0.0202449	1	0.66527	0.500697	0.981477	Har_00064885	Har_00064885	gi|114052038|ref|NP_001040449.1|actin related protein 2/3 complex subunit 4 [Bombyx mori] >gi|95102936|gb|ABF51409.1| actin related protein 2/3 complex subunit 4 [Bombyx mori]
0.001214	0.0339639	1	0.729389	0.551534	0.811143	Har_00052326	Har_00052326	gi|121511892|gb|ABM55397.1|putative secreted salivary protein [Xenopsylla cheopis]
0.000651	0.0247588	1	0.870116	1.96774	0.735639	Har_00233803	Har_00233803	na
0.001866	0.0429464	1	1.55562	1.87885	1.05325	Har_00049365	Har_00049365	gi|112983228|ref|NP_001037658.1|eIF3-S8 protein [Bombyx mori] >gi|110175037|gb|ABG54288.1| eIF3-S8 protein [Bombyx mori]
0.002212	0.0463301	1	1.90231	1.40437	1.16165	Har_00021063	Har_00021063	gi|164451507|gb|ABY56688.1|troponin I [Loxostege sticticalis]
0.001606	0.039623	1	0.721119	2.88862	0.154421	Har_00170292	Har_00170292	na
0.001856	0.0428874	1	0.852835	1.09893	0.41043	Har_00071358	Har_00071358	gi|194754543|ref|XP_001959554.1|GF12932 [Drosophila ananassae] >gi|190620852|gb|EDV36376.1| GF12932 [Drosophila ananassae]
0.002053	0.0447621	1	1.54188	1.82894	1.11877	Har_00046530	Har_00046530	gi|116786203|gb|ABK24019.1|unknown [Picea sitchensis]
0.001633	0.0399215	1	0.775813	0.559533	1.36984	Har_00059303	Har_00059303	gi|157130333|ref|XP_001655666.1|hypothetical protein AaeL_AAEL011748 [Aedes aegypti] >gi|94469310|gb|ABF18504.1| hypothetical conserved protein [Aedes aegypti] >gi|108871918|gb|EAT36143.1| conserved hypothetical protein [Aedes aegypti]
0.001018	0.0309784	1	1.09569	1.2223	0.423714	Har_00011433	Har_00011433	gi|110756545|ref|XP_001121721.1|PREDICTED: similar to CG33519-PB [Apis mellifera]
0.001797	0.0420417	1	0.644423	0.63269	0.773161	Har_00086786	Har_00086786	gi|118788823|ref|XP_317011.3|AGAP008432-PA [Anopheles gambiae str. PEST] >gi|116122930|gb|EAA12719.3| AGAP008432-PA [Anopheles gambiae str. PEST]
0.002284	0.0472013	1	0.824222	1.03351	0.394434	Har_00113695	Har_00113695	gi|156553849|ref|XP_001600449.1|PREDICTED: similar to ENSANGP00000021479 [Nasonia vitripennis]
9e-06	0.00383943	1	1.75473	1.77727	0.980799	Har_00061871	Har_00061871	gi|27260896|gb|AAN86048.1|ribosomal protein S2 [Spodoptera frugiperda]
0.001081	0.0318662	1	1.1497	1.43488	0.517412	Har_00189661	Har_00189661	na
0.000681	0.0252417	1	0.597234	0.603723	0.867967	Har_00186912	Har_00186912	na
0.001775	0.0417832	1	1.17024	0.576615	1.57666	Har_00036224	Har_00036224	gi|2738867|gb|AAB94559.1|hemocyte protease-3 [Manduca sexta]
0.002165	0.0460275	1	1.40321	1.98555	0.864969	Har_00001984	Har_00001984	na
0.000588	0.0235096	1	1.28016	1.99616	0.791527	Har_00044236	Har_00044236	gi|18253047|gb|AAL62468.1|ribosomal protein L3 [Spodoptera frugiperda]
0.000137	0.0119597	1	0.790913	0.467523	1.1959	Har_00133096	Har_00133096	na
0.001461	0.0375295	1	0.996817	0.402748	1.29914	Har_00090366	Har_00090366	gi|50293095|gb|AAT72922.1|sterol carrier protein 2/3-oxoacyl-CoA thiolase [Spodoptera littoralis]
0.000796	0.027098	1	0.734681	0.469174	1.11661	Har_00060831	Har_00060831	gi|114052092|ref|NP_001040214.1|signal peptidase complex subunit 2 [Bombyx mori] >gi|87248409|gb|ABD36257.1| signal peptidase complex subunit 2 [Bombyx mori]
3e-06	0.00233897	1	0.691562	0.445337	1.00054	Har_00087306	Har_00087306	gi|148298726|ref|NP_001091755.1|ADP-ribosylation factor [Bombyx mori] >gi|87248075|gb|ABD36090.1| ADP-ribosylation factor [Bombyx mori]
0.001877	0.0429544	1	1.50598	0.55399	1.20004	Har_00058369	Har_00058369	gi|6671050|gb|AAF23078.1|AF128867_1glutathione S-transferase [Choristoneura fumiferana]
0.000734	0.0261145	1	0.62188	0.502742	1.02005	Har_00058638	Har_00058638	gi|116789802|gb|ABK25392.1|unknown [Picea sitchensis]
0.00056	0.023063	1	0.737416	1.27842	0.530234	Har_00109289	Har_00109289	na
0.000484	0.0215418	1	0.585745	0.582586	1.12459	Har_00109158	Har_00109158	gi|195392078|ref|XP_002054686.1|GJ22671 [Drosophila virilis] >gi|194152772|gb|EDW68206.1| GJ22671 [Drosophila virilis]
0.000238	0.0150312	1	1.09209	0.33271	0.990007	Har_00090614	Har_00090614	na
0.000805	0.0272401	1	1.03258	1.7906	0.557567	Har_00165508	Har_00165508	na
5e-05	0.00751163	1	0.803088	0.424183	1.13397	Har_00205069	Har_00205069	na
0.000659	0.0249333	1	0.657161	0.464898	0.981242	Har_00030166	Har_00030166	gi|193713852|ref|XP_001947921.1|PREDICTED: similar to conserved hypothetical protein [Acyrthosiphon pisum]
0.00105	0.0313406	1	0.406435	0.310715	2.36942	Har_00214043	Har_00214043	na
0.001311	0.0356271	1	0.754204	0.447905	1.13283	Har_00037930	Har_00037930	gi|48095369|ref|XP_394428.1|PREDICTED: similar to CG7601-PA isoform 1 [Apis mellifera]
0.002004	0.0441622	1	1.42639	1.87338	0.793559	Har_00065571	Har_00065571	gi|16566713|gb|AAL26576.1|AF429974_1ribosomal protein L12 [Spodoptera frugiperda]
0.000193	0.0135942	1	0.819739	0.368015	0.980031	Har_00057370	Har_00057370	gi|156554681|ref|XP_001601355.1|PREDICTED: similar to bhlhzip transcription factor bigmax [Nasonia vitripennis]
0.001137	0.0327277	1	1.03349	1.96518	0.600002	Har_00050861	Har_00050861	gi|164448652|ref|NP_001106738.1|ubiquinol-cytochrome c reductase [Bombyx mori] >gi|98990259|gb|ABF60225.1| ubiquinol-cytochrome c reductase [Bombyx mori]
0.000392	0.0191016	1	1.41553	1.54058	0.643294	Har_00029218	Har_00029218	gi|183979300|dbj|BAG30761.1|similar to CG6803-PB [Papilio xuthus]
0.000365	0.0185752	1	1.54268	1.72782	0.785024	Har_00113417	Har_00113417	gi|193713712|ref|XP_001952048.1|PREDICTED: similar to Probable nucleolar GTP-binding protein 1 [Acyrthosiphon pisum]
0.001396	0.0366592	1	0.797052	0.538311	0.686303	Har_00107846	Har_00107846	gi|114051313|ref|NP_001040109.1|chaperonin containing t-complex polypeptide 1 beta subunit [Bombyx mori] >gi|87248085|gb|ABD36095.1| chaperonin containing t-complex polypeptide 1 beta subunit [Bombyx mori]
0.001481	0.0376876	1	0.526009	0.604423	0.920972	Har_00050967	Har_00050967	gi|62241290|dbj|BAD93613.1|protein disulfide-isomerase like protein ERp57 [Bombyx mori]
0.000143	0.012155	1	0.989705	0.415981	1.40623	Har_00055176	Har_00055176	gi|50293095|gb|AAT72922.1|sterol carrier protein 2/3-oxoacyl-CoA thiolase [Spodoptera littoralis]
4.7e-05	0.00737965	1	0.856147	0.357495	1.05464	Har_00087059	Har_00087059	gi|193704668|ref|XP_001946332.1|PREDICTED: similar to spectrin [Acyrthosiphon pisum]
3e-05	0.00646	1	0.763489	0.514052	0.73917	Har_00238219	Har_00238219	gi|193065558|ref|ZP_03046625.1|regulatory protein CII [Escherichia coli E22] >gi|194429717|ref|ZP_03062234.1| regulatory protein CII [Escherichia coli B171] >gi|192926743|gb|EDV81370.1| regulatory protein CII [Escherichia coli E22] >gi|194412276|gb|E
0.000548	0.0227136	1	1.82056	1.6476	0.869134	Har_00105589	Har_00105589	gi|87248237|gb|ABD36171.1|hairy cell leukemia protein 1 [Bombyx mori] >gi|221579705|gb|ACM24351.1| TGF-beta-inducible nuclear protein 1 [Bombyx mori]
0.001501	0.0379403	1	1.17851	1.76905	0.603887	Har_00117902	Har_00117902	gi|91083387|ref|XP_967513.1|PREDICTED: similar to cdc23 CG2508-PA [Tribolium castaneum]
0.00029	0.0165788	1	1.4837	1.75732	0.754018	Har_00040323	Har_00040323	gi|18253041|gb|AAL62465.1|60S acidic ribosomal protein P0 [Spodoptera frugiperda]
0.000709	0.0257674	1	0.766374	0.453835	0.830551	Har_00208281	Har_00208281	na
0.00023	0.0147124	1	1.53414	1.70618	0.754749	Har_00086253	Har_00086253	gi|189233817|ref|XP_971502.2|PREDICTED: similar to CG32019-PA [Tribolium castaneum]
0.001552	0.0388817	1	0.532504	0.548029	0.987216	Har_00008057	Har_00008057	gi|157118472|ref|XP_001659123.1|calponin/transgelin [Aedes aegypti] >gi|108875705|gb|EAT39930.1| calponin/transgelin [Aedes aegypti]
0.00248	0.0488865	1	0.935766	1.91807	0.590374	Har_00198622	Har_00198622	na
0.001766	0.0417016	1	0.658734	0.544453	1.24574	Har_00021234	Har_00021234	gi|66519149|ref|XP_396781.2|PREDICTED: similar to CG6650-PA [Apis mellifera]
0.000369	0.0186022	1	0.396978	0.741074	0.97306	Har_00072726	Har_00072726	gi|66545512|ref|XP_395166.2|PREDICTED: similar to CG33116-PA [Apis mellifera]
0.002253	0.0468202	1	0.638569	0.504608	0.883646	Har_00086716	Har_00086716	gi|112983416|ref|NP_001036972.1|ras protein [Bombyx mori] >gi|57157559|dbj|BAD83770.1| ras protein [Bombyx mori]
0.00121	0.0339639	1	0.672581	0.548415	0.771075	Har_00017197	Har_00017197	gi|91088443|ref|XP_968621.1|PREDICTED: similar to CG17593 CG17593-PA [Tribolium castaneum]
0.001178	0.0334605	1	0.859608	1.82875	0.60377	Har_00144415	Har_00144415	na
6.8e-05	0.00858927	1	0.799122	0.41207	0.859812	Har_00118791	Har_00118791	gi|195375158|ref|XP_002046370.1|GJ12542 [Drosophila virilis] >gi|194153528|gb|EDW68712.1| GJ12542 [Drosophila virilis]
0.00152	0.0382708	1	0.552207	0.639203	0.801025	Har_00042478	Har_00042478	gi|193659629|ref|XP_001944260.1|PREDICTED: similar to clathrin light chain [Acyrthosiphon pisum]
0.002508	0.0492008	1	0.653303	0.461915	0.936149	Har_00028697	Har_00028697	gi|156544526|ref|XP_001607296.1|PREDICTED: similar to mct-1 protein [Nasonia vitripennis]
0.000335	0.0178011	1	0.629839	0.473988	1.05677	Har_00213118	Har_00213118	na
0.001727	0.0413065	1	1.99565	1.56227	1.13839	Har_00021064	Har_00021064	gi|164451507|gb|ABY56688.1|troponin I [Loxostege sticticalis]
0.001407	0.0367985	1	0.747704	0.45945	0.819957	Har_00042161	Har_00042161	gi|56462290|gb|AAV91428.1|serpin 1 [Lonomia obliqua]
0.001318	0.03571	1	0.580896	0.732547	0.65572	Har_00018954	Har_00018954	gi|91077894|ref|XP_973141.1|PREDICTED: similar to predicted protein [Tribolium castaneum]
0.002301	0.0473175	1	0.504485	0.749611	0.737592	Har_00030574	Har_00030574	gi|91084657|ref|XP_967518.1|PREDICTED: similar to AGAP002962-PA [Tribolium castaneum]
0.001932	0.043422	1	1.16249	1.85817	0.600052	Har_00221824	Har_00221824	na
0.002328	0.0476549	1	0.617381	0.525594	0.855073	Har_00004917	Har_00004917	gi|91079170|ref|XP_967650.1|PREDICTED: similar to viral IAP-associated factor, putative [Tribolium castaneum]
0.000961	0.0301153	1	0.664665	0.419627	1.00606	Har_00013605	Har_00013605	gi|114053203|ref|NP_001040292.1|DnaJ homolog subfamily A member 1 [Bombyx mori] >gi|87248655|gb|ABD36380.1| DnaJ homolog subfamily A member 1 [Bombyx mori]
0.000756	0.0264191	1	0.63272	0.491124	0.891635	Har_00095048	Har_00095048	gi|112983659|ref|NP_001037337.1|DNA supercoiling factor [Bombyx mori] >gi|1663690|dbj|BAA08704.1| DNA supercoiling factor [Bombyx mori]
0.000243	0.0151984	1	0.919952	0.390796	1.30076	Har_00056800	Har_00056800	gi|170030366|ref|XP_001843060.1|peroxisomal multifunctional enzyme type 2 [Culex quinquefasciatus] >gi|167866952|gb|EDS30335.1| peroxisomal multifunctional enzyme type 2 [Culex quinquefasciatus]
0.001871	0.0429475	1	0.698738	0.553875	0.711221	Har_00169424	Har_00169424	na
0.00065	0.0247416	1	0.717042	0.629431	0.607649	Har_00223665	Har_00223665	na
0.001035	0.0311188	1	0.432886	0.661127	1.04906	Har_00015669	Har_00015669	gi|110761312|ref|XP_001120323.1|PREDICTED: similar to CG2813-PA [Apis mellifera]
0.000223	0.0144471	1	1.16301	1.76192	0.559009	Har_00029968	Har_00029968	gi|148298845|ref|NP_001091768.1|arginine/serine-rich splicing factor 7 [Bombyx mori] >gi|95103084|gb|ABF51483.1| arginine/serine-rich splicing factor 7 [Bombyx mori] >gi|102269217|gb|ABF55972.2| xl6 [Bombyx mori]
0.000209	0.013919	1	0.648045	0.445475	0.944867	Har_00119611	Har_00119611	gi|112982916|ref|NP_001037578.1|RNA binding motif protein [Bombyx mori] >gi|95102578|gb|ABF51227.1| RNA binding motif protein [Bombyx mori] >gi|95115210|gb|ABF55971.1| Tsu [Bombyx mori] >gi|221579722|gb|ACM24353.1| RNA-binding motif protein Y14 [Bomb
0.002265	0.0469832	1	0.698787	0.487805	0.79608	Har_00115077	Har_00115077	gi|66523966|ref|XP_393984.2|PREDICTED: similar to ring finger protein 2 isoform 1 [Apis mellifera]
4.5e-05	0.00734621	1	0.791384	0.44897	0.763056	Har_00059512	Har_00059512	gi|189238710|ref|XP_969341.2|PREDICTED: similar to AGAP009638-PA [Tribolium castaneum]
0.000795	0.027098	1	0.746915	0.385061	1.06116	Har_00114993	Har_00114993	gi|195447578|ref|XP_002071276.1|GK25216 [Drosophila willistoni] >gi|194167361|gb|EDW82262.1| GK25216 [Drosophila willistoni]
0.000833	0.0276363	1	0.718029	0.482601	0.779989	Har_00019465	Har_00019465	gi|112984342|ref|NP_001037211.1|Sop2 protein [Bombyx mori] >gi|55793531|gb|AAV65755.1| SOP2 [Bombyx mori]
0.00064	0.0245261	1	1.05718	2.43809	0.117069	-	(-)3xSLv1	na
0.001799	0.0420417	1	0.659697	0.624706	0.654948	Har_00117664	Har_00117664	gi|91079600|ref|XP_968514.1|PREDICTED: similar to transcription initiation factor TFIID subunit 7 [Tribolium castaneum]
0.001761	0.0416924	1	0.752263	1.18362	0.424133	Har_00200112	Har_00200112	na
0.002162	0.0460275	1	0.701778	0.564874	0.679089	Har_00084895	Har_00084895	gi|91078296|ref|XP_972110.1|PREDICTED: similar to presqualene diphosphate phosphatase [Tribolium castaneum]
0.000226	0.0145996	1	1.03716	0.362925	1.30356	Har_00064060	Har_00064060	gi|156254836|gb|ABU62829.1|serpin-2 [Spodoptera exigua]
7.4e-05	0.00892341	1	0.586067	0.496783	0.919539	Har_00103982	Har_00103982	gi|158293675|ref|XP_315022.4|AGAP004933-PA [Anopheles gambiae str. PEST] >gi|157016561|gb|EAA10489.4| AGAP004933-PA [Anopheles gambiae str. PEST]
8.9e-05	0.00972121	1	0.605803	1.07572	0.474301	Har_00105506	Har_00105506	gi|189234613|ref|XP_001816367.1|PREDICTED: similar to GA19017-PA [Tribolium castaneum]
0.001354	0.0360588	1	0.758689	1.62911	0.573418	Har_00177771	Har_00177771	na
0.000776	0.0268278	1	1.56149	1.98679	0.827304	Har_00091131	Har_00091131	na
0.002423	0.0484172	1	0.816475	0.487111	0.669391	Har_00054033	Har_00054033	gi|189241141|ref|XP_973953.2|PREDICTED: similar to CG6439 CG6439-PA [Tribolium castaneum]
0.001557	0.0389207	1	1.81727	1.74763	1.18448	Har_00104053	Har_00104053	gi|114052462|ref|NP_001040245.1|glutamate dehydrogenase [Bombyx mori] >gi|87248501|gb|ABD36303.1| glutamate dehydrogenase [Bombyx mori]
0.001327	0.0357566	1	1.1869	1.83775	0.578642	Har_00147932	Har_00147932	na
0.000701	0.0256417	1	0.629326	0.579343	0.725607	Har_00058489	Har_00058489	gi|91084833|ref|XP_966469.1|PREDICTED: similar to myoinositol oxygenase [Tribolium castaneum]
0.001358	0.0361228	1	0.0952749	2.96384	1.06739	Har_00059642	Har_00059642	gi|189240488|ref|XP_968002.2|PREDICTED: similar to proteophosphoglycan ppg4 [Tribolium castaneum]
0.002401	0.0484054	1	0.664646	0.397751	0.998072	Har_00026158	Har_00026158	gi|61098280|ref|NP_001012807.1|hydroxyacylglutathione hydrolase [Gallus gallus] >gi|53136582|emb|CAG32620.1| hypothetical protein [Gallus gallus]
0.001024	0.0310357	1	0.530601	0.544804	1.09759	Har_00106575	Har_00106575	gi|110755092|ref|XP_393581.2|PREDICTED: similar to geminin CG3183-PA [Apis mellifera]
0.00157	0.0391375	1	0.64434	0.49315	0.827911	Har_00093776	Har_00093776	gi|156550987|ref|XP_001604363.1|PREDICTED: similar to endomembrane protein emp70 [Nasonia vitripennis]
0.000961	0.0301153	1	0.584079	0.46327	0.966638	Har_00083224	Har_00083224	gi|66565943|ref|XP_624297.1|PREDICTED: similar to HIV-1 Rev binding protein [Apis mellifera]
0.000432	0.020349	1	0.567647	0.516517	0.890494	Har_00011617	Har_00011617	gi|170047167|ref|XP_001851105.1|transmembrane emp24 domain-containing protein 7 [Culex quinquefasciatus] >gi|167869668|gb|EDS33051.1| transmembrane emp24 domain-containing protein 7 [Culex quinquefasciatus]
0.000431	0.0203231	1	0.538594	0.538113	1.11005	Har_00076946	Har_00076946	gi|157136164|ref|XP_001663682.1|hypothetical protein AaeL_AAEL013495 [Aedes aegypti] >gi|108870011|gb|EAT34236.1| conserved hypothetical protein [Aedes aegypti]
0.000669	0.0250432	1	0.454446	1.16691	0.669776	Har_00153145	Har_00153145	na
0.001736	0.0413603	1	0.777336	0.561011	1.67419	Har_00005937	Har_00005937	gi|154707830|gb|AAU84716.2|triosephosphate isomerase [Helicoverpa armigera]
0.001031	0.0311188	1	0.940572	1.71914	0.475404	Har_00101286	Har_00101286	gi|112983906|ref|NP_001036848.1|En10 protein [Bombyx mori] >gi|10801566|dbj|BAB16696.1| EN10 [Bombyx mori]
0.000211	0.0139904	1	1.14707	0.43204	1.44931	Har_00031596	Har_00031596	gi|195134901|ref|XP_002011875.1|GI14334 [Drosophila mojavensis] >gi|193909129|gb|EDW07996.1| GI14334 [Drosophila mojavensis]
0.00187	0.0429464	1	0.420416	0.726452	0.848702	Har_00067417	Har_00067417	gi|170038579|ref|XP_001847126.1|inorganic phosphate cotransporter [Culex quinquefasciatus] >gi|167882325|gb|EDS45708.1| inorganic phosphate cotransporter [Culex quinquefasciatus]
0.000592	0.0235861	1	1.33349	1.83389	0.633569	Har_00041493	Har_00041493	gi|91078908|ref|XP_967303.1|PREDICTED: similar to AGAP006755-PA isoform 1 [Tribolium castaneum]
0.002494	0.0490555	1	0.66778	0.426739	0.906425	Har_00207456	Har_00207456	na
0.002176	0.0460884	1	1.26234	1.47096	0.478439	Har_00066394	Har_00066394	gi|114053001|ref|NP_001040334.1|ATP-binding cassette sub-family F member 2 [Bombyx mori] >gi|95102546|gb|ABF51209.1| ATP-binding cassette sub-family F member 2 [Bombyx mori]
0.001911	0.043251	1	0.791536	0.448517	0.720924	Har_00054035	Har_00054035	gi|189241141|ref|XP_973953.2|PREDICTED: similar to CG6439 CG6439-PA [Tribolium castaneum]
0.002019	0.0443415	1	1.94214	1.9827	0.979726	Har_00062698	Har_00062698	gi|195580147|ref|XP_002079917.1|GD21763 [Drosophila simulans] >gi|194191926|gb|EDX05502.1| GD21763 [Drosophila simulans]
0.000605	0.0238683	1	0.727184	0.416754	0.839275	Har_00059515	Har_00059515	gi|189238710|ref|XP_969341.2|PREDICTED: similar to AGAP009638-PA [Tribolium castaneum]
0.002097	0.0454803	1	0.528871	0.518961	0.922766	Har_00115934	Har_00115934	gi|114051630|ref|NP_001040167.1|acid phosphatase isoenzyme [Bombyx mori] >gi|87248263|gb|ABD36184.1| acid phosphatase isoenzyme [Bombyx mori]
0.001876	0.0429544	1	0.834359	0.482613	1.599	Har_00096645	Har_00096645	gi|56418417|gb|AAV91016.1|hemolymph proteinase 18 [Manduca sexta]
0.000518	0.022245	1	0.755336	0.501426	1.50814	Har_00003393	Har_00003393	gi|3511145|gb|AAC33731.1|cytochrome b5 [Helicoverpa armigera]
0.000958	0.0301048	1	0.905465	1.73457	0.481074	Har_00163726	Har_00163726	na
0.000819	0.0273524	1	0.696097	0.454619	0.791209	Har_00057126	Har_00057126	gi|158302018|ref|XP_551368.3|AGAP001460-PA [Anopheles gambiae str. PEST] >gi|157012751|gb|EAL38591.3| AGAP001460-PA [Anopheles gambiae str. PEST]
0.000837	0.0277006	1	0.762704	0.377477	1.15258	Har_00076091	Har_00076091	gi|156555350|ref|XP_001604790.1|PREDICTED: similar to glutamate carboxypeptidase [Nasonia vitripennis]
0.000286	0.0165481	1	0.659676	0.467923	0.806304	Har_00152199	Har_00152199	na
0.000962	0.0301154	1	0.680475	0.427551	0.854208	Har_00071120	Har_00071120	gi|189238710|ref|XP_969341.2|PREDICTED: similar to AGAP009638-PA [Tribolium castaneum]
0.002309	0.0474389	1	1.45415	1.99651	0.720999	Har_00048672	Har_00048672	gi|13991907|gb|AAK51552.1|AF368031_1receptor for activated protein kinase C RACK1 [Heliothis virescens]
0.002144	0.0460137	1	0.933479	1.43749	0.382407	Har_00012223	Har_00012223	gi|112983906|ref|NP_001036848.1|En10 protein [Bombyx mori] >gi|10801566|dbj|BAB16696.1| EN10 [Bombyx mori]
0.001888	0.0430319	1	0.709095	0.425547	0.820548	Har_00048615	Har_00048615	gi|112983332|ref|NP_001037648.1|eIF2B-alpha protein [Bombyx mori] >gi|110174935|gb|ABG54282.1| eIF2B-alpha protein [Bombyx mori]
0.002468	0.0488384	1	0.69924	1.58877	0.561875	Har_00000905	Har_00000905	gi|110749102|ref|XP_001122366.1|PREDICTED: similar to Cytochrome P450 6a8 (CYPVIA8) [Apis mellifera]
4.4e-05	0.0072882	1	1.27445	1.63014	0.512868	Har_00117032	Har_00117032	gi|219464275|ref|XP_002229835.1|hypothetical protein BRAFLDRAFT_115402 [Branchiostoma floridae] >gi|210102568|gb|EEA50615.1| hypothetical protein BRAFLDRAFT_115402 [Branchiostoma floridae]
0.000857	0.028123	1	0.453734	0.552313	1.01571	Har_00014166	Har_00014166	gi|66509679|ref|XP_395764.2|PREDICTED: similar to CTP:phosphocholine cytidylyltransferase 1 CG1049-PA, isoform A [Apis mellifera]
0.001464	0.0375295	1	0.649641	0.397961	0.954034	Har_00016585	Har_00016585	gi|162462371|ref|NP_001104817.1|lectin [Bombyx mori] >gi|1346296|sp|P98092.1|HMCT_BOMMO RecName: Full=Hemocytin; AltName: Full=Humoral lectin; Flags: Precursor >gi|664884|dbj|BAA06160.1| humoral lectin prepropeptide [Bombyx mori] >gi|1094393|prf||210
0.000447	0.0206259	1	0.842886	1.74866	0.508113	Har_00165969	Har_00165969	na
0.002369	0.0481224	1	0.598301	1.10829	0.449497	Har_00081745	Har_00081745	gi|114051287|ref|NP_001040381.1|fructose-1,6-bisphosphatase [Bombyx mori] >gi|95102692|gb|ABF51284.1| fructose-1,6-bisphosphatase [Bombyx mori]
0.001228	0.0341724	1	0.565513	0.57077	0.751727	Har_00083120	Har_00083120	gi|156544303|ref|XP_001607136.1|PREDICTED: similar to golgi reassembly stacking protein 2 (grasp2) [Nasonia vitripennis]
0.000661	0.0249503	1	0.763272	0.371304	0.855696	Har_00188784	Har_00188784	na
0.001345	0.0359249	1	0.84232	0.533335	1.85321	Har_00016154	Har_00016154	gi|212512587|gb|EEB15330.1|Microsomal glutathione S-transferase, putative [Pediculus humanus corporis]
0.001791	0.0420068	1	0.596644	0.491442	1.20995	Har_00180937	Har_00180937	na
0.002051	0.0447617	1	0.861624	0.339893	0.826027	Har_00103064	Har_00103064	gi|170033605|ref|XP_001844667.1|conserved hypothetical protein [Culex quinquefasciatus] >gi|167874635|gb|EDS38018.1| conserved hypothetical protein [Culex quinquefasciatus]
0.002285	0.0472013	1	0.587072	0.414752	0.9902	Har_00051322	Har_00051322	gi|158287957|ref|XP_309831.4|AGAP010873-PA [Anopheles gambiae str. PEST] >gi|157019438|gb|EAA05449.4| AGAP010873-PA [Anopheles gambiae str. PEST]
7.4e-05	0.00892341	1	0.774142	0.680577	0.457461	Har_00062504	Har_00062504	gi|189031276|gb|ACD74811.1|eukaryotic initiation factor 5C [Helicoverpa armigera]
6e-05	0.00814775	1	0.914085	0.339857	1.28985	Har_00005202	Har_00005202	gi|50293095|gb|AAT72922.1|sterol carrier protein 2/3-oxoacyl-CoA thiolase [Spodoptera littoralis]
0.00237	0.0481224	1	0.691731	0.424614	0.819466	Har_00084944	Har_00084944	gi|195029847|ref|XP_001987783.1|GH19762 [Drosophila grimshawi] >gi|193903783|gb|EDW02650.1| GH19762 [Drosophila grimshawi]
0.001266	0.0347804	1	0.551085	0.50963	0.855678	Har_00051237	Har_00051237	gi|66522015|ref|XP_393883.2|PREDICTED: similar to REG CG1591-PA [Apis mellifera]
0.00013	0.011572	1	0.538028	0.526174	0.847594	Har_00059892	Har_00059892	gi|114050835|ref|NP_001040407.1|ubiquitin-conjugating enzyme E2 [Bombyx mori] >gi|95102776|gb|ABF51329.1| ubiquitin-conjugating enzyme E2 isoform 1 [Bombyx mori]
0.000423	0.0200767	1	0.694518	0.510363	0.675205	Har_00098004	Har_00098004	gi|223890174|ref|NP_001138802.1|JAB-MPN domain protein [Bombyx mori] >gi|221579605|gb|ACM24339.1| JAB-MPN domain protein [Bombyx mori]
0.002561	0.0497847	1	0.650693	0.492314	0.74596	Har_00008174	Har_00008174	gi|115605361|gb|ABJ15788.1|glutathione S-transferase omega 1 [Bombyx mandarina] >gi|158605323|dbj|BAF91356.1| omega-class glutathione S-transferase [Bombyx mori]
0.001607	0.039623	1	0.652654	0.560789	0.650752	Har_00190477	Har_00190477	gi|218685720|gb|ACL01111.1|Cat [Reporter vector p6851]
0.000253	0.0155444	1	0.528337	0.732358	0.614945	Har_00121535	Har_00121535	gi|157130092|ref|XP_001655556.1|hypothetical protein AaeL_AAEL000304 [Aedes aegypti] >gi|157130098|ref|XP_001655559.1| hypothetical protein AaeL_AAEL000304 [Aedes aegypti] >gi|157130100|ref|XP_001655560.1| hypothetical protein AaeL_AAEL000304 [Aedes
0.001987	0.043959	1	0.683301	0.407893	0.852578	Har_00009318	Har_00009318	gi|118777492|ref|XP_308101.3|AGAP011035-PA [Anopheles gambiae str. PEST] >gi|116132739|gb|EAA03861.3| AGAP011035-PA [Anopheles gambiae str. PEST]
9.5e-05	0.00994421	1	1.03338	0.29646	0.826479	Har_00053608	Har_00053608	gi|26007526|gb|AAF71290.2|AF255919_1chemosensory protein [Mamestra brassicae]
0.000247	0.0153636	1	0.559509	0.58013	0.72929	Har_00028805	Har_00028805	gi|157110568|ref|XP_001651159.1|hypothetical protein AaeL_AAEL015238 [Aedes aegypti] >gi|108868377|gb|EAT32602.1| conserved hypothetical protein [Aedes aegypti]
0.00029	0.0165788	1	0.754148	0.389886	0.799256	Har_00087724	Har_00087724	gi|149240245|ref|XP_001525998.1|hypothetical protein LELG_02556 [Lodderomyces elongisporus NRRL YB-4239] >gi|146450121|gb|EDK44377.1| hypothetical protein LELG_02556 [Lodderomyces elongisporus NRRL YB-4239]
0.000304	0.0168881	1	0.664421	0.918824	0.383028	Har_00202175	Har_00202175	na
0.000882	0.0286318	1	0.665971	0.555699	0.631214	Har_00033972	Har_00033972	gi|195354995|ref|XP_002043979.1|GM13680 [Drosophila sechellia] >gi|194129224|gb|EDW51267.1| GM13680 [Drosophila sechellia]
0.001272	0.0348605	1	0.55942	0.455506	1.09465	Har_00013498	Har_00013498	gi|91089541|ref|XP_971419.1|PREDICTED: similar to CG11577 CG11577-PA [Tribolium castaneum]
2.3e-05	0.00601191	1	0.568255	0.410101	0.993784	Har_00111617	Har_00111617	gi|215503204|gb|EEC12698.1|laminin gamma-1 chain, putative [Ixodes scapularis]
8.1e-05	0.00927296	1	0.640126	0.390828	0.925051	Har_00052735	Har_00052735	gi|62858139|ref|NP_001016496.1|hypothetical protein LOC549250 [Xenopus (Silurana) tropicalis] >gi|119368240|sp|Q28HN4.1|CC124_XENTR RecName: Full=Coiled-coil domain-containing protein 124 >gi|89272961|emb|CAJ83215.1| novel protein similar to hypothet
0.001965	0.043686	1	0.563917	0.426641	0.957291	Har_00014004	Har_00014004	na
0.001728	0.0413065	1	0.503628	1.34233	0.612699	Har_00086987	Har_00086987	gi|91082721|ref|XP_972476.1|PREDICTED: similar to eiger CG12919-PA [Tribolium castaneum]
0.000315	0.0171825	1	0.780565	1.61284	0.474135	Har_00177865	Har_00177865	na
0.000144	0.0121875	1	0.652099	0.163864	2.14385	Har_00066734	Har_00066734	gi|148908742|gb|ABR17478.1|unknown [Picea sitchensis]
0.000177	0.0132297	1	0.680611	0.36163	1.0761	Har_00017414	Har_00017414	gi|48095165|ref|XP_394373.1|PREDICTED: similar to CG6013-PA [Apis mellifera]
0.001097	0.0320126	1	1.47453	1.9411	0.654407	Har_00125412	Har_00125412	na
0.002578	0.0498833	1	0.595366	0.458434	0.837543	Har_00105827	Har_00105827	gi|195449437|ref|XP_002072074.1|GK22516 [Drosophila willistoni] >gi|194168159|gb|EDW83060.1| GK22516 [Drosophila willistoni]
0.000982	0.0305616	1	1.15074	1.72651	0.453191	Har_00238480	Har_00238480	na
0.001413	0.0368488	1	0.670368	0.429264	0.791876	Har_00228668	Har_00228668	na
0.000817	0.0273462	1	0.721915	0.411912	0.761903	Har_00123357	Har_00123357	na
0.000331	0.0176925	1	0.942532	0.366168	1.52644	Har_00121831	Har_00121831	gi|163838678|ref|NP_001106222.1|cytochrome P450 monooxygenase [Bombyx mori] >gi|48843448|dbj|BAD23844.1| cytochrome P450 monooxygenase [Bombyx mori]
0.001389	0.0366242	1	0.487323	0.864867	0.535812	Har_00231918	Har_00231918	na
0.000889	0.0287558	1	1.66154	1.97293	0.739833	Har_00077447	Har_00077447	gi|9624381|gb|AAF90148.1|AF274022_1tetraspanin D76 [Manduca sexta]
0.002103	0.0455231	1	0.664645	0.454681	0.745133	Har_00118911	Har_00118911	gi|91077680|ref|XP_974637.1|PREDICTED: similar to step ii splicing factor slu7 [Tribolium castaneum]
0.002334	0.0477095	1	0.652701	0.405852	0.847291	Har_00098829	Har_00098829	gi|212506042|gb|EEB10358.1|conserved hypothetical protein [Pediculus humanus corporis]
0.000669	0.0250432	1	1.98701	1.76207	0.785395	Har_00109054	Har_00109054	gi|189241595|ref|XP_971320.2|PREDICTED: similar to Peritrophin A CG17058-PA [Tribolium castaneum]
0.001894	0.0431252	1	0.499868	0.511703	0.876077	Har_00112394	Har_00112394	gi|157115727|ref|XP_001658280.1|deoxyuridine 5'-triphosphate nucleotidohydrolase [Aedes aegypti] >gi|108876776|gb|EAT41001.1| deoxyuridine 5'-triphosphate nucleotidohydrolase [Aedes aegypti]
0.00118	0.0334753	1	0.654244	0.430675	1.26223	Har_00114876	Har_00114876	gi|62002225|gb|AAX58712.1|pheromone-degrading enzyme 2 [Antheraea polyphemus]
0.000876	0.0285394	1	0.617191	0.524099	0.688735	Har_00119661	Har_00119661	gi|112983000|ref|NP_001037082.1|Sui1 protein [Bombyx mori] >gi|37886145|gb|AAR04678.1| Sui1 [Bombyx mori]
0.000868	0.028381	1	0.743312	0.566065	0.529311	Har_00098069	Har_00098069	gi|158296492|ref|XP_316883.4|AGAP000906-PA [Anopheles gambiae str. PEST] >gi|157015324|gb|EAA12124.5| AGAP000906-PA [Anopheles gambiae str. PEST]
0.000182	0.0133172	1	0.615525	1.41605	0.508712	Har_00064482	Har_00064482	gi|66815907|ref|XP_641970.1|SAP DNA-binding domain-containing protein [Dictyostelium discoideum AX4] >gi|60470088|gb|EAL68069.1| SAP DNA-binding domain-containing protein [Dictyostelium discoideum AX4]
0.000205	0.0138415	1	0.564349	3.16565	0.123423	Har_00137191	Har_00137191	na
0.000173	0.0130602	1	0.458816	0.542136	1.12968	Har_00095062	Har_00095062	gi|156544834|ref|XP_001606804.1|PREDICTED: similar to ENSANGP00000018326 [Nasonia vitripennis]
0.000578	0.0233785	1	0.651226	0.509608	0.663115	Har_00055328	Har_00055328	na
0.002277	0.0471456	1	0.535755	0.435631	1.06488	Har_00067956	Har_00067956	gi|218505765|ref|NP_001136228.1|death-related protein [Bombyx mori] >gi|212989183|gb|ACJ38715.1| death-related protein [Bombyx mori]
0.000749	0.0263666	1	0.627099	0.485691	0.71957	Har_00090139	Har_00090139	gi|182511222|ref|NP_001116822.1|kinesin heavy chain [Bombyx mori] >gi|118480524|gb|ABK92268.1| kinesin-like protein KHC [Bombyx mori]
9.5e-05	0.00994421	1	0.526432	0.470457	0.878918	Har_00044530	Har_00044530	gi|114052711|ref|NP_001040538.1|transmembrane emp24 protein transport domain containing 9 [Bombyx mori] >gi|95102996|gb|ABF51439.1| transmembrane emp24 protein transport domain containing 9 [Bombyx mori]
0.000342	0.0179411	1	0.78625	1.54756	0.427949	Har_00006332	Har_00006332	gi|66534585|ref|XP_393087.2|PREDICTED: similar to GDI interacting protein 3 CG5469-PD, isoform D [Apis mellifera]
0.001326	0.0357553	1	0.779008	0.373039	0.743389	Har_00115611	Har_00115611	gi|170033559|ref|XP_001844644.1|conserved hypothetical protein [Culex quinquefasciatus] >gi|167874612|gb|EDS37995.1| conserved hypothetical protein [Culex quinquefasciatus]
0.000178	0.0132824	1	0.698514	0.327812	0.942242	Har_00099994	Har_00099994	gi|41056125|ref|NP_956859.1|coiled-coil domain containing 124 [Danio rerio] >gi|82187338|sp|Q6PHE8.1|CC124_DANRE RecName: Full=Coiled-coil domain-containing protein 124 >gi|34194041|gb|AAH56579.1| Ccdc124 protein [Danio rerio] >gi|37681861|gb|AAQ9780
0.000763	0.0265407	1	0.639835	0.481453	0.696051	Har_00225265	Har_00225265	na
0.00021	0.013965	1	0.603373	0.419851	0.845907	Har_00011215	Har_00011215	gi|91076586|ref|XP_968109.1|PREDICTED: similar to icarus CG9031-PA [Tribolium castaneum]
0.000251	0.0154846	1	0.848684	0.326616	0.77041	Har_00203433	Har_00203433	na
7.4e-05	0.00892341	1	0.990782	1.9364	0.41683	Har_00135785	Har_00135785	na
0.002154	0.0460275	1	0.57962	0.455606	0.807016	Har_00059142	Har_00059142	gi|157118472|ref|XP_001659123.1|calponin/transgelin [Aedes aegypti] >gi|108875705|gb|EAT39930.1| calponin/transgelin [Aedes aegypti]
0.00203	0.0444751	1	0.523725	0.482239	0.843804	Har_00031324	Har_00031324	gi|91079170|ref|XP_967650.1|PREDICTED: similar to viral IAP-associated factor, putative [Tribolium castaneum]
0.000302	0.016874	1	0.662623	0.446667	0.719906	Har_00193235	Har_00193235	na
5.1e-05	0.00751212	1	0.699075	0.370791	0.818486	Har_00044567	Har_00044567	gi|26007526|gb|AAF71290.2|AF255919_1chemosensory protein [Mamestra brassicae]
0.000374	0.0186876	1	0.22002	0.124652	7.71788	Har_00026339	Har_00026339	gi|116794133|gb|ABK27018.1|unknown [Picea sitchensis]
0.002487	0.0489818	1	0.61441	0.49365	0.695117	Har_00051198	Har_00051198	gi|114051598|ref|NP_001040416.1|leukotriene A4 hydrolase [Bombyx mori] >gi|95102808|gb|ABF51345.1| leukotriene A4 hydrolase [Bombyx mori]
0.000361	0.0184968	1	0.505175	0.440857	1.05662	Har_00208190	Har_00208190	na
0.000578	0.0233785	1	0.565924	0.411713	0.904417	Har_00067096	Har_00067096	na
0.001988	0.0439596	1	0.560817	0.83737	0.44441	Har_00114817	Har_00114817	gi|170038171|ref|XP_001846926.1|conserved hypothetical protein [Culex quinquefasciatus] >gi|167881690|gb|EDS45073.1| conserved hypothetical protein [Culex quinquefasciatus]
0.001951	0.0436322	1	0.592427	0.595717	0.587569	Har_00105260	Har_00105260	gi|4090872|gb|AAD09285.1|putative serpin [Hyphantria cunea] >gi|5163416|gb|AAD40672.1| serpin [Hyphantria cunea]
8.6e-05	0.00964993	1	0.662625	0.409902	0.763278	Har_00088416	Har_00088416	gi|156547852|ref|XP_001605005.1|PREDICTED: similar to ENSANGP00000020422 isoform 2 [Nasonia vitripennis] >gi|156547854|ref|XP_001604983.1| PREDICTED: similar to ENSANGP00000020422 isoform 1 [Nasonia vitripennis]
0.000882	0.0286318	1	0.723021	0.561201	0.509993	Har_00032515	Har_00032515	gi|170038512|ref|XP_001847093.1|gp150 protein [Culex quinquefasciatus] >gi|167882236|gb|EDS45619.1| gp150 protein [Culex quinquefasciatus]
0.002373	0.0481413	1	0.534829	0.619433	0.621963	Har_00195655	Har_00195655	na
0.00227	0.0470644	1	0.544182	0.498436	0.75841	Har_00114402	Har_00114402	gi|114052615|ref|NP_001040547.1|nonmuscle myosin essential light chain [Bombyx mori] >gi|95103128|gb|ABF51505.1| nonmuscle myosin essential light chain [Bombyx mori] >gi|98990267|gb|ABF60229.1| myosin II essential light chain [Bombyx mori]
0.001388	0.0366192	1	0.518426	0.402994	0.983086	Har_00032336	Har_00032336	gi|157131809|ref|XP_001655946.1|hypothetical protein AaeL_AAEL002760 [Aedes aegypti] >gi|108881781|gb|EAT46006.1| conserved hypothetical protein [Aedes aegypti]
0.000504	0.0219789	1	0.643098	0.354388	0.900576	Har_00020318	Har_00020318	na
0.001156	0.0331269	1	0.57899	0.605228	0.58466	Har_00048649	Har_00048649	gi|91087761|ref|XP_974991.1|PREDICTED: similar to predicted protein [Tribolium castaneum]
9e-06	0.00383943	1	0.618165	0.380275	0.866497	Har_00034586	Har_00034586	gi|112983864|ref|NP_001037390.1|ubiquitin-conjugating enzyme E2I [Bombyx mori] >gi|78216467|gb|ABB36655.1| ubiquitin-conjugating enzyme E2I [Bombyx mori] >gi|95102838|gb|ABF51360.1| ubiquitin-conjugating enzyme [Bombyx mori]
0.001635	0.0399215	1	0.868297	2.16293	0.10802	-	(-)3xSLv1	na
7.7e-05	0.00909062	1	0.731348	1.60786	0.445328	Har_00078218	Har_00078218	gi|91087179|ref|XP_975411.1|PREDICTED: similar to CG9471 CG9471-PB [Tribolium castaneum]
0.000312	0.0171221	1	0.519451	0.398759	1.02441	Har_00047902	Har_00047902	gi|158291368|ref|XP_312882.4|AGAP003184-PA [Anopheles gambiae str. PEST] >gi|157017742|gb|EAA08478.4| AGAP003184-PA [Anopheles gambiae str. PEST]
0.000299	0.0168169	1	0.483922	0.481977	0.865284	Har_00023745	Har_00023745	gi|114053305|ref|NP_001040125.1|G10 protein [Bombyx mori] >gi|87248133|gb|ABD36119.1| G10 protein [Bombyx mori]
0.000992	0.0307038	1	0.56689	0.438285	0.811543	Har_00226590	Har_00226590	na
0.001404	0.0367625	1	0.568396	0.530693	0.663316	Har_00066638	Har_00066638	gi|157109039|ref|XP_001650497.1|hypothetical protein AaeL_AAEL005202 [Aedes aegypti] >gi|108879149|gb|EAT43374.1| conserved hypothetical protein [Aedes aegypti]
0.002157	0.0460275	1	0.663264	0.309766	1.02819	Har_00111511	Har_00111511	gi|157110515|ref|XP_001651135.1|hypothetical protein AaeL_AAEL005601 [Aedes aegypti] >gi|108878667|gb|EAT42892.1| conserved hypothetical protein [Aedes aegypti]
8.6e-05	0.00964993	1	0.753516	0.310391	0.854356	Har_00105612	Har_00105612	gi|158292674|ref|XP_001688510.1|AGAP005160-PA [Anopheles gambiae str. PEST] >gi|158292678|ref|XP_001688512.1| AGAP005160-PB [Anopheles gambiae str. PEST] >gi|157017103|gb|EDO64093.1| AGAP005160-PA [Anopheles gambiae str. PEST] >gi|157017105|gb|EDO640
0.000358	0.0184803	1	0.630854	0.340316	0.925997	Har_00182119	Har_00182119	na
0.001256	0.0346742	1	0.51227	0.422101	1.0883	Har_00193423	Har_00193423	na
0.002008	0.0442073	1	0.694882	0.378172	0.755357	Har_00087725	Har_00087725	gi|149240245|ref|XP_001525998.1|hypothetical protein LELG_02556 [Lodderomyces elongisporus NRRL YB-4239] >gi|146450121|gb|EDK44377.1| hypothetical protein LELG_02556 [Lodderomyces elongisporus NRRL YB-4239]
0.000832	0.0276234	1	0.765906	0.26785	0.966532	Har_00023727	Har_00023727	gi|67463949|pdb|1Z6O|AChain A, Crystal Structure Of Trichoplusia Ni Secreted Ferritin >gi|67463950|pdb|1Z6O|B Chain B, Crystal Structure Of Trichoplusia Ni Secreted Ferritin >gi|67463951|pdb|1Z6O|C Chain C, Crystal Structure Of Trichoplusia Ni Secret
0.000505	0.0219789	1	0.791271	0.479302	0.52156	Har_00113559	Har_00113559	gi|182509202|ref|NP_001116812.1|tubulointerstitial nephritis antigen [Bombyx mori] >gi|81303350|gb|ABB71105.1| TIN-ag-RP [Bombyx mori]
0.001027	0.031085	1	0.705228	0.642574	0.433092	Har_00080789	Har_00080789	gi|221119676|ref|XP_002155414.1|PREDICTED: similar to ORF2-encoded protein, partial [Hydra magnipapillata]
0.001035	0.0311188	1	0.770251	0.961774	0.264702	Har_00198089	Har_00198089	na
0.000923	0.0295386	1	0.83721	0.327113	0.713865	Har_00069924	Har_00069924	gi|170033605|ref|XP_001844667.1|conserved hypothetical protein [Culex quinquefasciatus] >gi|167874635|gb|EDS38018.1| conserved hypothetical protein [Culex quinquefasciatus]
0.000538	0.022631	1	0.516905	0.395528	0.956184	Har_00099246	Har_00099246	gi|195012356|ref|XP_001983602.1|GH15490 [Drosophila grimshawi] >gi|193897084|gb|EDV95950.1| GH15490 [Drosophila grimshawi]
0.002105	0.0455445	1	0.730284	0.36591	0.730117	Har_00047254	Har_00047254	gi|112983280|ref|NP_001036957.1|Hsc70/Hsp90-organizing protein HOP [Bombyx mori] >gi|60592739|dbj|BAD90844.1| Hsc70/Hsp90-organizing protein HOP [Bombyx mori]
0.001956	0.0436361	1	0.737922	1.87016	0.493496	Har_00232243	Har_00232243	na
0.000434	0.0204007	1	0.595676	0.495015	0.660144	Har_00187481	Har_00187481	na
4.4e-05	0.0072882	1	0.524248	0.474548	0.782123	Har_00048348	Har_00048348	gi|87248649|gb|ABD36377.1|aldehyde dehydrogenase [Bombyx mori]
3.1e-05	0.00661236	1	1.66183	1.88067	0.607224	Har_00044734	Har_00044734	gi|116090821|gb|ABJ55992.1|ribosomal protein S3 [Ostrinia nubilalis]
0.001206	0.0339361	1	0.728525	0.382229	1.43406	Har_00035117	Har_00035117	gi|56418417|gb|AAV91016.1|hemolymph proteinase 18 [Manduca sexta]
0.000812	0.0272798	1	0.586438	0.481781	0.686866	Har_00059098	Har_00059098	gi|62241290|dbj|BAD93613.1|protein disulfide-isomerase like protein ERp57 [Bombyx mori]
0.001945	0.0435842	1	0.685405	0.533037	0.53021	Har_00085327	Har_00085327	gi|156555095|ref|XP_001604415.1|PREDICTED: hypothetical protein [Nasonia vitripennis]
0.000534	0.0225467	1	0.605249	0.3342	0.95572	Har_00072228	Har_00072228	gi|195114940|ref|XP_002002025.1|GI14246 [Drosophila mojavensis] >gi|193912600|gb|EDW11467.1| GI14246 [Drosophila mojavensis]
0.001471	0.0376024	1	0.553327	0.483383	0.721108	Har_00087240	Har_00087240	gi|195451519|ref|XP_002072959.1|GK13878 [Drosophila willistoni] >gi|194169044|gb|EDW83945.1| GK13878 [Drosophila willistoni]
0.002447	0.0485961	1	0.483264	0.496406	0.802514	Har_00110651	Har_00110651	gi|1708635|gb|AAC47451.1|neuroglian
0.00115	0.0329968	1	0.654216	0.605972	0.485286	Har_00189169	Har_00189169	na
0.002411	0.0484172	1	0.606925	0.441823	0.717173	Har_00093491	Har_00093491	gi|114051904|ref|NP_001040434.1|F-actin capping protein beta subunit [Bombyx mori] >gi|95102878|gb|ABF51380.1| F-actin capping protein beta subunit [Bombyx mori]
0.001681	0.0405629	1	1.51144	0.447742	1.54976	Har_00061561	Har_00061561	gi|114052781|ref|NP_001040343.1|peripheral-type benzodiazepine receptor [Bombyx mori] >gi|95102570|gb|ABF51223.1| peripheral-type benzodiazepine receptor [Bombyx mori]
0.001695	0.0408353	1	0.700568	0.335727	0.811736	Har_00085469	Har_00085469	gi|189240095|ref|XP_972543.2|PREDICTED: similar to split ends CG18497-PA [Tribolium castaneum]
0.00196	0.0436392	1	0.430345	0.473427	1.06784	Har_00095055	Har_00095055	gi|156544834|ref|XP_001606804.1|PREDICTED: similar to ENSANGP00000018326 [Nasonia vitripennis]
0.000277	0.0163952	1	0.636331	0.482406	0.620701	Har_00057552	Har_00057552	gi|153792659|ref|NP_001093278.1|actin-depolymerizing factor 1 [Bombyx mori] >gi|95102548|gb|ABF51212.1| actin-depolymerizing factor 4 [Bombyx mori] >gi|95103010|gb|ABF51446.1| actin-depolymerizing factor 1 [Bombyx mori]
0.00247	0.0488384	1	0.807876	0.293679	0.802903	Har_00072227	Har_00072227	gi|195114940|ref|XP_002002025.1|GI14246 [Drosophila mojavensis] >gi|193912600|gb|EDW11467.1| GI14246 [Drosophila mojavensis]
0.000634	0.0244557	1	0.690264	0.317633	0.866409	Har_00089987	Har_00089987	gi|112983090|ref|NP_001037664.1|eukaryotic translation initiation factor 3 subunit 1 [Bombyx mori] >gi|110175082|gb|ABG54291.1| eukaryotic translation initiation factor 3 subunit 1 [Bombyx mori]
0.00197	0.0437541	1	0.649553	0.446046	0.652884	Har_00021858	Har_00021858	gi|170032252|ref|XP_001843996.1|cubilin [Culex quinquefasciatus] >gi|167872112|gb|EDS35495.1| cubilin [Culex quinquefasciatus]
0.000537	0.022631	1	0.527187	0.133152	2.69193	Har_00000851	Har_00000851	gi|156619508|gb|ABU88428.1|cytochrome p450 CYP337B1 [Helicoverpa armigera]
0.000142	0.0121385	1	0.694582	0.309145	0.87727	Har_00088604	Har_00088604	gi|156538352|ref|XP_001604715.1|PREDICTED: similar to USF [Nasonia vitripennis]
1.1e-05	0.0042881	1	0.518688	0.484527	0.747305	Har_00040118	Har_00040118	gi|66509994|ref|XP_625200.1|PREDICTED: similar to Nedd8 CG10679-PA [Apis mellifera] >gi|156541904|ref|XP_001599314.1| PREDICTED: similar to ENSANGP00000010151 [Nasonia vitripennis]
0.000435	0.0204265	1	0.56105	0.418164	0.792246	Har_00059143	Har_00059143	gi|157118472|ref|XP_001659123.1|calponin/transgelin [Aedes aegypti] >gi|108875705|gb|EAT39930.1| calponin/transgelin [Aedes aegypti]
0.002438	0.0485866	1	0.596981	0.50868	0.611357	Har_00069064	Har_00069064	gi|112983092|ref|NP_001037596.1|ALY [Bombyx mori] >gi|95115188|gb|ABF55960.1| ALY [Bombyx mori]
0.001079	0.031828	1	0.496782	0.5285	0.705176	Har_00058697	Har_00058697	gi|170054703|ref|XP_001863250.1|kin17 [Culex quinquefasciatus] >gi|167874937|gb|EDS38320.1| kin17 [Culex quinquefasciatus]
0.000231	0.0147124	1	0.626966	0.4058	0.726553	Har_00061529	Har_00061529	gi|125987245|ref|XP_001357385.1|GA18577 [Drosophila pseudoobscura pseudoobscura] >gi|54645716|gb|EAL34454.1| GA18577 [Drosophila pseudoobscura pseudoobscura]
0.000823	0.0274455	1	0.558656	0.401034	0.824355	Har_00105824	Har_00105824	gi|195449437|ref|XP_002072074.1|GK22516 [Drosophila willistoni] >gi|194168159|gb|EDW83060.1| GK22516 [Drosophila willistoni]
0.000343	0.0179727	1	0.658112	0.417802	0.671463	Har_00007344	Har_00007344	gi|66557455|ref|XP_395182.2|PREDICTED: similar to metalloprotease 1 [Apis mellifera]
2.2e-05	0.00595713	1	0.597391	0.466827	0.661472	Har_00182800	Har_00182800	na
0.000584	0.0234742	1	0.878077	0.296691	0.706623	Har_00093237	Har_00093237	gi|157125706|ref|XP_001660741.1|hypothetical protein AaeL_AAEL001998 [Aedes aegypti] >gi|108882594|gb|EAT46819.1| conserved hypothetical protein [Aedes aegypti]
0.001567	0.0391274	1	0.573638	0.334583	0.958015	Har_00058022	Har_00058022	gi|193652331|ref|XP_001944575.1|PREDICTED: similar to BEL12_AG transposon polyprotein [Acyrthosiphon pisum]
0.001263	0.0347804	1	0.572399	0.479562	0.668173	Har_00053025	Har_00053025	gi|91093363|ref|XP_969584.1|PREDICTED: similar to CG10576 CG10576-PA [Tribolium castaneum]
0.000369	0.0186022	1	0.674813	0.334972	0.807509	Har_00077549	Har_00077549	na
0.000182	0.0133172	1	0.642104	0.369504	0.768603	Har_00169423	Har_00169423	na
0.000455	0.020741	1	0.674256	0.35346	0.764906	Har_00227568	Har_00227568	na
0.001868	0.0429464	1	0.839893	0.326928	1.51505	Har_00238650	Har_00238650	na
0.000691	0.0254662	1	0.51616	0.387648	0.90297	Har_00102610	Har_00102610	gi|119370498|sp|Q27913.2|GBP_PSESERecName: Full=Growth-blocking peptide, long form; Short=GBP; Contains: RecName: Full=Growth-blocking peptide, short form; Flags: Precursor
0.002113	0.0456303	1	0.534322	0.38716	0.86855	Har_00214089	Har_00214089	na
1.5e-05	0.00474336	1	0.734727	0.355229	0.687352	Har_00052361	Har_00052361	gi|112983960|ref|NP_001036843.1|Samui protein [Bombyx mori] >gi|27151475|sp|Q9BLJ6.1|BAGS_BOMMO RecName: Full=BAG domain-containing protein Samui >gi|13442776|dbj|BAB39763.1| Samui [Bombyx mori]
0.002451	0.0486527	1	0.58599	0.502454	0.609083	Har_00060496	Har_00060496	gi|195448925|ref|XP_002071873.1|GK10225 [Drosophila willistoni] >gi|194167958|gb|EDW82859.1| GK10225 [Drosophila willistoni]
0.000143	0.012155	1	0.545658	0.35512	1.0815	Har_00047904	Har_00047904	gi|158291368|ref|XP_312882.4|AGAP003184-PA [Anopheles gambiae str. PEST] >gi|157017742|gb|EAA08478.4| AGAP003184-PA [Anopheles gambiae str. PEST]
0.00253	0.0494606	1	0.515931	0.67068	0.515741	Har_00049776	Har_00049776	gi|212510022|gb|EEB13282.1|N-terminal acetyltransferase complex Ard1 subunit, putative [Pediculus humanus corporis]
0.00216	0.0460275	1	0.478582	0.411655	1.10598	Har_00237971	Har_00237971	na
0.000636	0.0244557	1	0.423379	0.522361	0.80471	Har_00091918	Har_00091918	gi|170032272|ref|XP_001844006.1|ribonucleoside-diphosphate reductase small chain [Culex quinquefasciatus] >gi|167872122|gb|EDS35505.1| ribonucleoside-diphosphate reductase small chain [Culex quinquefasciatus]
0.002467	0.0488384	1	0.612007	1.7611	1.953	Har_00047689	Har_00047689	gi|116334936|ref|YP_802431.1|hypothetical protein CRP_034 [Candidatus Carsonella ruddii PV] >gi|116235217|dbj|BAF35065.1| hypothetical protein [Candidatus Carsonella ruddii PV]
0.002205	0.0463301	1	0.664851	0.297202	1.11266	Har_00208158	Har_00208158	na
7.3e-05	0.00887382	1	0.868267	0.247699	0.825706	Har_00004391	Har_00004391	gi|122894086|gb|ABM67689.1|chemosensory protein CSP2 [Spodoptera exigua]
0.002541	0.049549	1	0.751527	0.265831	1.12711	Har_00090416	Har_00090416	gi|170030366|ref|XP_001843060.1|peroxisomal multifunctional enzyme type 2 [Culex quinquefasciatus] >gi|167866952|gb|EDS30335.1| peroxisomal multifunctional enzyme type 2 [Culex quinquefasciatus]
3.4e-05	0.00676368	1	0.357809	0.241638	2.04909	Har_00051776	Har_00051776	gi|196014544|ref|XP_002117131.1|hypothetical protein TRIADDRAFT_32037 [Trichoplax adhaerens] >gi|190580353|gb|EDV20437.1| hypothetical protein TRIADDRAFT_32037 [Trichoplax adhaerens]
0.002414	0.0484172	1	0.54467	0.455892	0.712427	Har_00033349	Har_00033349	gi|212516163|gb|EEB18205.1|conserved hypothetical protein [Pediculus humanus corporis]
0.000153	0.0125566	1	0.804364	0.259626	1.18328	Har_00011258	Har_00011258	gi|114053075|ref|NP_001040535.1|NADH-ubiquinone reductase [Bombyx mori] >gi|95102970|gb|ABF51426.1| NADH-ubiquinone reductase [Bombyx mori]
0.000436	0.020431	1	0.616919	0.35894	0.796656	Har_00010412	Har_00010412	gi|195572986|ref|XP_002104476.1|Dicer-1 [Drosophila simulans] >gi|194200403|gb|EDX13979.1| Dicer-1 [Drosophila simulans]
0.001607	0.039623	1	0.612037	0.305906	0.941035	Har_00188313	Har_00188313	na
0.001786	0.041933	1	0.574246	0.43297	0.706333	Har_00153017	Har_00153017	na
0.001305	0.0355495	1	0.769658	1.81908	0.41474	Har_00201080	Har_00201080	na
0.002406	0.0484172	1	0.756476	0.398984	1.72449	Har_00086116	Har_00086116	na
0.000348	0.0181088	1	0.629422	0.369389	0.75222	Har_00106058	Har_00106058	gi|91078538|ref|XP_970648.1|PREDICTED: similar to CG10671 CG10671-PA [Tribolium castaneum]
0.001331	0.0357622	1	0.541543	0.617541	0.522536	Har_00076663	Har_00076663	gi|212510022|gb|EEB13282.1|N-terminal acetyltransferase complex Ard1 subunit, putative [Pediculus humanus corporis]
0.00142	0.0369674	1	0.607577	0.397835	0.721995	Har_00019543	Har_00019543	gi|23208546|gb|AAN15790.1|heat shock-like protein [Galleria mellonella]
4.4e-05	0.0072882	1	0.591173	0.371415	0.792258	Har_00056521	Har_00056521	gi|189241035|ref|XP_971765.2|PREDICTED: similar to mrj CG8448-PA [Tribolium castaneum]
0.001415	0.0368797	1	0.661301	0.310779	0.845095	Har_00018710	Har_00018710	gi|189240756|ref|XP_968999.2|PREDICTED: similar to zinc knuckle domain protein [Tribolium castaneum]
0.000315	0.0171825	1	0.613787	0.377823	1.33632	Har_00101831	Har_00101831	gi|91081359|ref|XP_971395.1|PREDICTED: similar to CG7830 CG7830-PA [Tribolium castaneum]
0.000635	0.0244557	1	0.66496	0.319679	1.22804	Har_00077275	Har_00077275	gi|195580838|ref|XP_002080241.1|GD10382 [Drosophila simulans] >gi|194192250|gb|EDX05826.1| GD10382 [Drosophila simulans]
0.001464	0.0375295	1	0.466866	0.475821	0.778698	Har_00057276	Har_00057276	gi|12657593|dbj|BAB21565.1|laminin [Bombyx mori]
0.001085	0.031901	1	0.428697	0.914579	0.440807	Har_00068350	Har_00068350	gi|110756832|ref|XP_001122547.1|PREDICTED: similar to SPRY domain-containing SOCS box protein SSB-3 [Apis mellifera]
0.002178	0.0461092	1	0.558919	0.453837	0.68126	Har_00010233	Har_00010233	gi|195447328|ref|XP_002071165.1|GK25646 [Drosophila willistoni] >gi|194167250|gb|EDW82151.1| GK25646 [Drosophila willistoni]
0.002237	0.046637	1	0.646163	0.272774	1.02292	Har_00207873	Har_00207873	na
0.000313	0.0171354	1	0.663227	0.470603	0.551493	Har_00051495	Har_00051495	gi|91085997|ref|XP_972384.1|PREDICTED: similar to cyclin [Tribolium castaneum]
0.000128	0.0115302	1	0.561228	0.384118	0.797861	Har_00051364	Har_00051364	gi|157118472|ref|XP_001659123.1|calponin/transgelin [Aedes aegypti] >gi|108875705|gb|EAT39930.1| calponin/transgelin [Aedes aegypti]
5e-05	0.00751163	1	0.629107	0.365443	1.33817	Har_00001548	Har_00001548	gi|116833221|gb|ABK29523.1|CG10733-PA-like protein [Helicoverpa armigera]
0.000442	0.0205419	1	0.609685	0.38766	0.726141	Har_00229482	Har_00229482	na
0.000346	0.0180671	1	0.600457	0.316253	0.900898	Har_00054563	Har_00054563	gi|116789802|gb|ABK25392.1|unknown [Picea sitchensis]
0.000179	0.0133131	1	0.936462	0.316429	1.73337	Har_00067329	Har_00067329	gi|114053251|ref|NP_001040524.1|peroxisomal membrane protein PMP22 [Bombyx mori] >gi|95102822|gb|ABF51352.1| peroxisomal membrane protein PMP22 [Bombyx mori]
0.000222	0.0144444	1	0.579003	0.39466	0.746102	Har_00009229	Har_00009229	gi|170069501|ref|XP_001869248.1|conserved hypothetical protein [Culex quinquefasciatus] >gi|167865439|gb|EDS28822.1| conserved hypothetical protein [Culex quinquefasciatus]
0.000288	0.0165481	1	0.569853	0.377251	0.792757	Har_00043514	Har_00043514	gi|62241290|dbj|BAD93613.1|protein disulfide-isomerase like protein ERp57 [Bombyx mori]
0.000231	0.0147124	1	0.466841	0.519765	0.700604	Har_00081476	Har_00081476	na
0.000713	0.0258348	1	0.506155	0.373337	0.896711	Har_00084118	Har_00084118	gi|170047507|ref|XP_001851260.1|ATPase n2b [Culex quinquefasciatus] >gi|167869933|gb|EDS33316.1| ATPase n2b [Culex quinquefasciatus]
0.002281	0.0472013	1	0.49533	0.573395	0.596529	Har_00013065	Har_00013065	gi|53148461|dbj|BAD52258.1|proteasome alpha 4 subunit [Plutella xylostella]
5.4e-05	0.007752	1	0.631528	0.423311	0.633688	Har_00097906	Har_00097906	gi|66507568|ref|XP_394526.2|PREDICTED: similar to CG32702-PA [Apis mellifera]
0.000591	0.0235861	1	0.64806	0.266401	0.980657	Har_00098980	Har_00098980	gi|116784655|gb|ABK23424.1|unknown [Picea sitchensis]
0.002095	0.0454587	1	0.585309	0.361664	0.797729	Har_00013687	Har_00013687	gi|18479021|gb|AAL73387.1|AF409102_13-dehydrecdysone 3b-reductase [Trichoplusia ni]
0.001218	0.0339778	1	0.659316	0.259836	1.01561	Har_00052740	Har_00052740	gi|62858139|ref|NP_001016496.1|hypothetical protein LOC549250 [Xenopus (Silurana) tropicalis] >gi|119368240|sp|Q28HN4.1|CC124_XENTR RecName: Full=Coiled-coil domain-containing protein 124 >gi|89272961|emb|CAJ83215.1| novel protein similar to hypothet
0.001507	0.0380494	1	0.424813	0.802927	0.494013	Har_00010894	Har_00010894	gi|195114550|ref|XP_002001830.1|GI14864 [Drosophila mojavensis] >gi|193912405|gb|EDW11272.1| GI14864 [Drosophila mojavensis]
0.001665	0.0403923	1	0.596822	0.320946	0.874331	Har_00115971	Har_00115971	gi|118780497|ref|XP_310190.3|AGAP009506-PA [Anopheles gambiae str. PEST] >gi|116131103|gb|EAA05903.3| AGAP009506-PA [Anopheles gambiae str. PEST]
0.000598	0.0237395	1	0.731764	0.34561	1.51562	Har_00029098	Har_00029098	gi|56418417|gb|AAV91016.1|hemolymph proteinase 18 [Manduca sexta]
0.002035	0.0445199	1	0.605698	0.454206	0.603464	Har_00096580	Har_00096580	gi|193624700|ref|XP_001947191.1|PREDICTED: hypothetical protein [Acyrthosiphon pisum]
0.000437	0.0204567	1	0.594964	0.535586	0.520818	Har_00102688	Har_00102688	gi|66559873|ref|XP_395542.2|PREDICTED: similar to CG10711-PA [Apis mellifera]
0.001729	0.0413065	1	0.627591	0.362421	0.728782	Har_00115278	Har_00115278	gi|114051598|ref|NP_001040416.1|leukotriene A4 hydrolase [Bombyx mori] >gi|95102808|gb|ABF51345.1| leukotriene A4 hydrolase [Bombyx mori]
0.000777	0.0268289	1	0.717998	0.68626	0.335941	Har_00185627	Har_00185627	na
0.002522	0.0493469	1	0.743946	0.336165	1.52039	Har_00086119	Har_00086119	na
2.6e-05	0.00609181	1	0.585236	0.390125	0.717992	Har_00095076	Har_00095076	gi|157116039|ref|XP_001658352.1|cysteine dioxygenase [Aedes aegypti] >gi|108876652|gb|EAT40877.1| cysteine dioxygenase [Aedes aegypti]
0.000758	0.0264481	1	0.393179	0.459714	0.906381	Har_00102071	Har_00102071	na
0.000501	0.0219315	1	0.597954	0.419057	0.653054	Har_00215084	Har_00215084	na
0.002208	0.0463301	1	0.265564	0.173482	3.54297	Har_00007366	Har_00007366	gi|148298833|ref|NP_001091765.1|NADP-dependent oxidoreductase [Bombyx mori] >gi|95102972|gb|ABF51427.1| NADP-dependent oxidoreductase [Bombyx mori]
0.001925	0.0433508	1	0.638701	0.400906	0.63681	Har_00106256	Har_00106256	gi|91084331|ref|XP_972583.1|PREDICTED: similar to AGAP012380-PA [Tribolium castaneum]
0.00079	0.0270021	1	0.490046	0.434982	0.762032	Har_00029641	Har_00029641	gi|158287282|ref|XP_001688182.1|AGAP011301-PA [Anopheles gambiae str. PEST] >gi|157019576|gb|EDO64459.1| AGAP011301-PA [Anopheles gambiae str. PEST]
0.001253	0.0346548	1	0.455483	0.740171	0.481771	Har_00035653	Har_00035653	gi|115749234|ref|XP_796372.2|PREDICTED: similar to WD and tetratricopeptide repeats 1 [Strongylocentrotus purpuratus] >gi|115975593|ref|XP_001193290.1| PREDICTED: similar to WD and tetratricopeptide repeats 1 [Strongylocentrotus purpuratus]
0.001369	0.0363299	1	0.651054	0.409646	0.607758	Har_00187490	Har_00187490	na
0.000797	0.027098	1	0.655222	0.279017	0.886502	Har_00079603	Har_00079603	gi|195392331|ref|XP_002054811.1|GJ22587 [Drosophila virilis] >gi|194152897|gb|EDW68331.1| GJ22587 [Drosophila virilis]
0.001882	0.0430036	1	0.398989	0.517948	0.783334	Har_00047775	Har_00047775	gi|114051499|ref|NP_001040361.1|heme oxygenase [Bombyx mori] >gi|95102630|gb|ABF51253.1| heme oxygenase [Bombyx mori]
0.002102	0.0455231	1	0.657853	0.265953	1.08181	Har_00088732	Har_00088732	gi|157116039|ref|XP_001658352.1|cysteine dioxygenase [Aedes aegypti] >gi|108876652|gb|EAT40877.1| cysteine dioxygenase [Aedes aegypti]
8.2e-05	0.00931668	1	0.483844	0.437024	0.763833	Har_00086078	Har_00086078	gi|195427687|ref|XP_002061908.1|GK17252 [Drosophila willistoni] >gi|194157993|gb|EDW72894.1| GK17252 [Drosophila willistoni]
1e-06	0.00155931	1	0.715637	0.318762	0.704734	Har_00079309	Har_00079309	gi|168472697|gb|ACA24124.1|chemosensory protein 3 [Bombyx mandarina]
2.6e-05	0.00609181	1	0.686656	0.256886	0.902757	Har_00052386	Har_00052386	gi|26007526|gb|AAF71290.2|AF255919_1chemosensory protein [Mamestra brassicae]
0.002287	0.0472013	1	0.478004	0.606249	0.548805	Har_00062391	Har_00062391	gi|156542315|ref|XP_001599442.1|PREDICTED: similar to CG17985-PA [Nasonia vitripennis]
0.001465	0.0375339	1	0.503013	0.370062	0.854228	Har_00042794	Har_00042794	gi|160333474|ref|NP_001103767.1|lysosomal thiol reductase IP30 isoform 2 [Bombyx mori] >gi|87248349|gb|ABD36227.1| lysosomal thiol reductase IP30 precursor isoform 2 [Bombyx mori]
0.001173	0.0333814	1	0.444748	0.506056	0.705936	Har_00115441	Har_00115441	gi|156537165|ref|XP_001603914.1|PREDICTED: similar to CG6856-PA [Nasonia vitripennis]
0.000232	0.0147553	1	0.588605	0.352926	0.764395	Har_00105076	Har_00105076	gi|114050851|ref|NP_001040157.1|tetraspanin E [Bombyx mori] >gi|87248235|gb|ABD36170.1| tetraspanin E [Bombyx mori]
0.002157	0.0460275	1	0.505019	0.458388	0.681965	Har_00048356	Har_00048356	na
0.000473	0.0212404	1	0.532297	0.43917	0.674984	Har_00063037	Har_00063037	gi|153791441|ref|NP_001093295.1|cAMP-dependent protein kinase R1 [Bombyx mori] >gi|146220618|gb|ABQ11379.1| cAMP-dependent protein kinase R1 [Bombyx mori]
0.002115	0.0456515	1	0.537198	0.456141	0.641323	Har_00013747	Har_00013747	na
0.001903	0.0431584	1	0.483809	0.338439	0.959497	Har_00120158	Har_00120158	gi|83583695|gb|ABC24707.1|hemicentin-like protein 2 [Spodoptera frugiperda]
0.000167	0.012865	1	0.918684	2.55404	0.0669343	Har_00167954	Har_00167954	na
0.000288	0.0165481	1	1.02623	0.237393	1.47336	Har_00032028	Har_00032028	gi|219448135|ref|XP_002221820.1|hypothetical protein BRAFLDRAFT_83975 [Branchiostoma floridae] >gi|210110906|gb|EEA58727.1| hypothetical protein BRAFLDRAFT_83975 [Branchiostoma floridae]
0.002563	0.0497847	1	0.652361	0.344663	1.43295	Har_00104729	Har_00104729	gi|170046016|ref|XP_001850582.1|conserved hypothetical protein [Culex quinquefasciatus] >gi|167868944|gb|EDS32327.1| conserved hypothetical protein [Culex quinquefasciatus]
0.001188	0.0336389	1	0.674757	0.281644	1.21723	Har_00020188	Har_00020188	gi|91076494|ref|XP_972946.1|PREDICTED: similar to Protein CREG1 precursor (Cellular repressor of E1A-stimulated genes 1) [Tribolium castaneum]
0.00079	0.0270021	1	0.792564	1.81269	0.356761	Har_00012783	Har_00012783	gi|212515731|gb|EEB17821.1|krueppel c2h2-type zinc finger protein, putative [Pediculus humanus corporis]
0.000154	0.0125929	1	0.597012	0.30245	0.863053	Har_00230611	Har_00230611	na
4.1e-05	0.00715838	1	0.577126	0.286713	1.06482	Har_00035451	Har_00035451	gi|189237821|ref|XP_974331.2|PREDICTED: similar to AGAP012144-PA [Tribolium castaneum]
0.002022	0.0443858	1	0.46193	0.755251	0.443733	Har_00188270	Har_00188270	na
4.2e-05	0.00722144	1	0.39911	0.531663	0.729286	Har_00020374	Har_00020374	gi|189236728|ref|XP_974937.2|PREDICTED: similar to AGAP011983-PA [Tribolium castaneum]
0.000206	0.0138415	1	0.542427	0.356828	0.798653	Har_00029163	Har_00029163	gi|157118472|ref|XP_001659123.1|calponin/transgelin [Aedes aegypti] >gi|108875705|gb|EAT39930.1| calponin/transgelin [Aedes aegypti]
0.00217	0.0460684	1	0.625913	0.328882	1.3365	Har_00007309	Har_00007309	gi|114051966|ref|NP_001040198.1|mitochondrial aldehyde dehydrogenase [Bombyx mori] >gi|87248351|gb|ABD36228.1| mitochondrial aldehyde dehydrogenase [Bombyx mori]
0.000359	0.0184897	1	0.533102	0.428381	0.67369	Har_00059780	Har_00059780	gi|170028261|ref|XP_001842014.1|39S ribosomal protein L24, mitochondrial [Culex quinquefasciatus] >gi|170055433|ref|XP_001863580.1| 39S ribosomal protein L24, mitochondrial [Culex quinquefasciatus] >gi|167874169|gb|EDS37552.1| 39S ribosomal protein L
0.001812	0.0422582	1	0.475946	0.445677	0.718375	Har_00184306	Har_00184306	na
0.000668	0.0250432	1	0.617767	0.343594	1.39621	Har_00030273	Har_00030273	gi|212517119|gb|EEB19056.1|translocon-associated protein subunit delta precursor, putative [Pediculus humanus corporis]
0.001217	0.0339708	1	0.395225	0.406877	1.05826	Har_00017212	Har_00017212	gi|212511053|gb|EEB14102.1|conserved hypothetical protein [Pediculus humanus corporis]
0.000128	0.0115302	1	0.578964	0.441827	0.593469	Har_00035986	Har_00035986	gi|156547745|ref|XP_001605608.1|PREDICTED: similar to cubulin [Nasonia vitripennis]
0.000872	0.0284501	1	0.687995	0.537949	0.409941	Har_00059356	Har_00059356	gi|209732940|gb|ACI67339.1|2-amino-3-ketobutyrate coenzyme A ligase, mitochondrial precursor [Salmo salar]
0.001657	0.0402414	1	0.559344	0.529331	0.511852	Har_00183283	Har_00183283	na
0.002118	0.0456724	1	0.554998	0.34034	0.802295	Har_00020281	Har_00020281	gi|148298750|ref|NP_001091839.1|6-phosphogluconolactonase [Bombyx mori] >gi|124108018|gb|ABM90638.1| 6-phosphogluconolactonase [Bombyx mori]
0.001313	0.03566	1	0.561793	0.399172	0.675547	Har_00018603	Har_00018603	gi|91077894|ref|XP_973141.1|PREDICTED: similar to predicted protein [Tribolium castaneum]
0.000352	0.0182539	1	0.514819	0.390173	0.752627	Har_00063293	Har_00063293	gi|87248649|gb|ABD36377.1|aldehyde dehydrogenase [Bombyx mori]
8.9e-05	0.00972121	1	0.657444	0.395154	0.580034	Har_00233970	Har_00233970	na
0.00171	0.0410001	1	0.549885	0.454691	0.601712	Har_00021049	Har_00021049	gi|66508536|ref|XP_397072.2|PREDICTED: similar to C04G6.4 [Apis mellifera]
0.000282	0.0165396	1	0.568155	0.358	0.739582	Har_00081351	Har_00081351	gi|112983392|ref|NP_001036991.1|HSP90 cochaperone CDC37 homologue [Bombyx mori] >gi|60592745|dbj|BAD90847.1| HSP90 cochaperone CDC37 homologue [Bombyx mori]
0.000338	0.0178347	1	0.650504	0.407145	0.567613	Har_00003785	Har_00003785	gi|29169224|gb|AAO65965.1|casein kinase I2 [Helicoverpa zea]
6.5e-05	0.00837407	1	0.571886	0.339131	1.29294	Har_00056223	Har_00056223	gi|148298849|ref|NP_001091796.1|programmed cell death protein 5-like protein [Bombyx mori] >gi|116272489|gb|ABJ97180.1| programmed cell death protein 5-like protein [Bombyx mori]
0.00019	0.0135517	1	0.758866	0.405074	0.487947	Har_00119656	Har_00119656	gi|91094135|ref|XP_968794.1|PREDICTED: similar to GA12977-PA [Tribolium castaneum]
0.001429	0.0370524	1	0.524303	0.607944	0.470229	Har_00079169	Har_00079169	gi|189241741|ref|XP_967399.2|PREDICTED: similar to CG14073 CG14073-PA [Tribolium castaneum]
0.00238	0.0481511	1	0.441482	0.555554	0.610976	Har_00055064	Har_00055064	gi|160333484|ref|NP_001103768.1|myosin light polypeptide 9 isoform B [Bombyx mori] >gi|87248543|gb|ABD36324.1| myosin light polypeptide 9 isoform 1 [Bombyx mori]
9e-05	0.00975971	1	0.530102	0.387502	0.728014	Har_00018601	Har_00018601	gi|91077894|ref|XP_973141.1|PREDICTED: similar to predicted protein [Tribolium castaneum]
0.000135	0.0118768	1	0.534004	0.374048	0.746952	Har_00076725	Har_00076725	gi|114050829|ref|NP_001040324.1|mitogen-activated protein-binding protein-interacting protein [Bombyx mori] >gi|87248531|gb|ABD36318.1| mitogen-activated protein-binding protein-interacting protein [Bombyx mori]
0.000941	0.0299241	1	0.509377	0.438926	0.665927	Har_00080983	Har_00080983	gi|56418423|gb|AAV91019.1|hemolymph proteinase 21 [Manduca sexta]
0.000577	0.0233785	1	0.424225	0.447079	0.778185	Har_00024005	Har_00024005	gi|158287282|ref|XP_001688182.1|AGAP011301-PA [Anopheles gambiae str. PEST] >gi|157019576|gb|EDO64459.1| AGAP011301-PA [Anopheles gambiae str. PEST]
0.000812	0.0272798	1	0.583931	0.341569	0.738526	Har_00230485	Har_00230485	na
0.002509	0.0492008	1	0.43765	0.394523	1.176	Har_00014852	Har_00014852	gi|193657395|ref|XP_001951030.1|PREDICTED: similar to logjam CG10733-PA [Acyrthosiphon pisum]
0.000847	0.0278961	1	0.784335	0.2588	0.722026	Har_00037885	Har_00037885	gi|157119951|ref|XP_001653457.1|acyl-CoA oxidase [Aedes aegypti] >gi|108875121|gb|EAT39346.1| acyl-CoA oxidase [Aedes aegypti]
0.00028	0.0164865	1	0.468272	0.375686	0.832937	Har_00091050	Har_00091050	gi|66558248|ref|XP_624095.1|PREDICTED: similar to CG10657-PA isoform 1 [Apis mellifera]
0.001464	0.0375295	1	0.609333	0.331615	0.725178	Har_00094440	Har_00094440	gi|114051598|ref|NP_001040416.1|leukotriene A4 hydrolase [Bombyx mori] >gi|95102808|gb|ABF51345.1| leukotriene A4 hydrolase [Bombyx mori]
0.001183	0.0335183	1	0.45177	0.740658	0.437777	Har_00117193	Har_00117193	gi|114052500|ref|NP_001040345.1|syndecan binding protein [Bombyx mori] >gi|95102580|gb|ABF51228.1| syndecan binding protein [Bombyx mori]
0.001877	0.0429544	1	1.9924	1.90721	0.553417	Har_00031545	Har_00031545	gi|218436702|dbj|BAH03384.1|kynureninase [Bombyx mori]
0.000618	0.0240681	1	0.535528	0.335514	1.23387	Har_00086271	Har_00086271	gi|91091940|ref|XP_967719.1|PREDICTED: similar to GA18941-PA [Tribolium castaneum]
2.8e-05	0.0062993	1	0.543596	0.331072	0.808948	Har_00111186	Har_00111186	gi|189240847|ref|XP_001812473.1|PREDICTED: similar to AGAP004586-PA [Tribolium castaneum]
0.000204	0.0138415	1	0.616789	0.376753	0.625816	Har_00105026	Har_00105026	gi|114050851|ref|NP_001040157.1|tetraspanin E [Bombyx mori] >gi|87248235|gb|ABD36170.1| tetraspanin E [Bombyx mori]
0.000793	0.0270842	1	0.548635	0.3218	0.822337	Har_00098906	Har_00098906	gi|157127307|ref|XP_001654915.1|Srb7p: RNA polymerase II holoenzyme component, putative [Aedes aegypti] >gi|121955142|sp|Q16RX1.1|MED21_AEDAE RecName: Full=Mediator of RNA polymerase II transcription subunit 21; AltName: Full=Mediator complex subunit
3.9e-05	0.00708265	1	0.611193	0.331647	0.716197	Har_00009230	Har_00009230	gi|170069501|ref|XP_001869248.1|conserved hypothetical protein [Culex quinquefasciatus] >gi|167865439|gb|EDS28822.1| conserved hypothetical protein [Culex quinquefasciatus]
0.000152	0.0125199	1	0.449498	0.429721	0.749489	Har_00058848	Har_00058848	gi|114052242|ref|NP_001040131.1|glutathione S-transferase omega 1 [Bombyx mori] >gi|87248151|gb|ABD36128.1| glutathione S-transferase omega 1 [Bombyx mori]
9.5e-05	0.00994421	1	0.596469	0.44125	0.549688	Har_00049253	Har_00049253	gi|91081019|ref|XP_976475.1|PREDICTED: hypothetical protein [Tribolium castaneum]
0.002478	0.0488865	1	0.526288	0.515254	0.532065	Har_00174255	Har_00174255	na
0.000165	0.0127981	1	0.685334	0.355064	0.592686	Har_00074965	Har_00074965	gi|116833215|gb|ABK29520.1|CG13607-PA-like protein [Helicoverpa armigera]
1.7e-05	0.00512493	1	0.657384	0.361104	0.606687	Har_00097904	Har_00097904	gi|66507568|ref|XP_394526.2|PREDICTED: similar to CG32702-PA [Apis mellifera]
0.000819	0.0273524	1	0.584706	0.392334	0.624959	Har_00051991	Har_00051991	gi|114053175|ref|NP_001040296.1|N-acetyl-glucosamine-6-phosphate isomerase [Bombyx mori] >gi|87248667|gb|ABD36386.1| N-acetyl-glucosamine-6-phosphate isomerase [Bombyx mori]
0.001752	0.0415663	1	0.48268	0.853673	0.347884	Har_00029304	Har_00029304	gi|170039197|ref|XP_001847430.1|beat protein [Culex quinquefasciatus] >gi|167862800|gb|EDS26183.1| beat protein [Culex quinquefasciatus]
0.00018	0.0133172	1	0.505107	0.332341	0.853064	Har_00006421	Har_00006421	gi|121511892|gb|ABM55397.1|putative secreted salivary protein [Xenopsylla cheopis]
0.002112	0.0456303	1	0.39276	0.64483	0.565277	Har_00017310	Har_00017310	gi|91091098|ref|XP_968555.1|PREDICTED: similar to AGAP002051-PA [Tribolium castaneum]
0.000151	0.0124603	1	0.537273	0.351232	0.758348	Har_00211551	Har_00211551	na
0.0002	0.0137656	1	0.73783	0.20441	1.0625	Har_00043222	Har_00043222	gi|114050941|ref|NP_001040329.1|receptor expression enhancing protein isoform 2 [Bombyx mori] >gi|87248617|gb|ABD36361.1| receptor expression enhancing protein isoform 2 [Bombyx mori]
0.001032	0.0311188	1	0.557816	0.26252	0.96729	Har_00237438	Har_00237438	na
0.000209	0.013919	1	0.447301	0.428668	0.734606	Har_00221396	Har_00221396	na
8.1e-05	0.00927296	1	0.708768	0.315746	1.59003	Har_00059845	Har_00059845	gi|157674503|gb|ABV60347.1|putative peroxiredoxin [Lutzomyia longipalpis]
0.002224	0.0464953	1	0.578572	0.290466	0.836784	Har_00102077	Har_00102077	gi|66510575|ref|XP_392939.2|PREDICTED: similar to Protein-glutamine gamma-glutamyltransferase K (Transglutaminase K) (TGase K) (TGK) (TG(K)) (Transglutaminase-1) (Epidermal TGase) [Apis mellifera]
0.001164	0.0332508	1	0.421933	0.699164	0.47642	Har_00110705	Har_00110705	gi|50344918|ref|NP_001002131.1|hypothetical protein LOC415221 [Danio rerio] >gi|47937964|gb|AAH71432.1| Zgc:86762 [Danio rerio] >gi|122891281|emb|CAM13018.1| novel protein (zgc:86762) [Danio rerio]
0.000129	0.0115512	1	0.497588	0.512479	0.550931	Har_00067296	Har_00067296	gi|91087761|ref|XP_974991.1|PREDICTED: similar to predicted protein [Tribolium castaneum]
0.000755	0.0264191	1	0.51876	0.298982	0.904981	Har_00083633	Har_00083633	gi|156544686|ref|XP_001605321.1|PREDICTED: similar to tubulin folding cofactor E [Nasonia vitripennis]
0.001958	0.0436376	1	0.590957	0.341917	0.694444	Har_00081426	Har_00081426	gi|112983092|ref|NP_001037596.1|ALY [Bombyx mori] >gi|95115188|gb|ABF55960.1| ALY [Bombyx mori]
0.00012	0.0112116	1	0.069466	2.5343	1.25599	Har_00123611	Har_00123611	na
0.000994	0.0307236	1	0.588306	0.363088	0.654835	Har_00005058	Har_00005058	gi|125775119|ref|XP_001358811.1|GA12400 [Drosophila pseudoobscura pseudoobscura] >gi|54638552|gb|EAL27954.1| GA12400 [Drosophila pseudoobscura pseudoobscura]
0.000198	0.0137114	1	0.581967	0.974653	0.246391	Har_00032175	Har_00032175	gi|91089953|ref|XP_973480.1|PREDICTED: similar to AGAP004409-PA [Tribolium castaneum]
0.000341	0.0179094	1	0.409562	0.355304	0.95764	Har_00060240	Har_00060240	gi|114051499|ref|NP_001040361.1|heme oxygenase [Bombyx mori] >gi|95102630|gb|ABF51253.1| heme oxygenase [Bombyx mori]
0.002381	0.0481511	1	0.608816	0.30471	1.33306	Har_00003471	Har_00003471	gi|2108064|gb|AAB58081.1|dopa decarboxylase [Helicoverpa armigera armigera]
0.000603	0.0238354	1	0.464098	0.336401	1.1301	Har_00053712	Har_00053712	gi|153792270|ref|NP_001093280.1|malate dehydrogenase [Bombyx mori] >gi|95103050|gb|ABF51466.1| malate dehydrogenase [Bombyx mori]
0.000272	0.0162481	1	0.607718	0.39125	0.580925	Har_00059134	Har_00059134	gi|189236526|ref|XP_975464.2|PREDICTED: similar to f-spondin [Tribolium castaneum]
0.001029	0.0311188	1	0.724167	0.229847	1.20519	Har_00056799	Har_00056799	na
0.002023	0.0443862	1	1.0122	0.0487664	2.86491	Har_00074543	Har_00074543	gi|182509208|ref|NP_001116815.1|carboxylesterase CarE-11 [Bombyx mori] >gi|170284254|gb|ACB12415.1| carboxylesterase CarE-11 [Bombyx mori]
0.000194	0.0136434	1	0.493625	0.563563	0.495593	Har_00086011	Har_00086011	gi|156547313|ref|XP_001601697.1|PREDICTED: similar to procollagen-lysine,2-oxoglutarate 5-dioxygenase [Nasonia vitripennis]
0.000815	0.0272995	1	0.576451	0.476553	0.50164	Har_00042282	Har_00042282	gi|211939903|gb|ACJ13432.1|proteasome subunit beta 7 [Helicoverpa armigera]
0.001874	0.0429544	1	0.533367	0.481888	0.535211	Har_00004977	Har_00004977	gi|66519157|ref|XP_393468.2|PREDICTED: similar to CG17331-PA isoform 1 [Apis mellifera]
3e-05	0.00646	1	0.4911	0.39254	0.71286	Har_00090735	Har_00090735	gi|62241290|dbj|BAD93613.1|protein disulfide-isomerase like protein ERp57 [Bombyx mori]
0.002567	0.0498177	1	0.525463	0.492242	0.531061	Har_00111122	Har_00111122	gi|114050853|ref|NP_001040410.1|1110059p08rik-like protein [Bombyx mori] >gi|95102786|gb|ABF51334.1| 1110059p08rik-like protein [Bombyx mori]
0.000295	0.0167167	1	0.684594	0.378004	1.88405	Har_00048771	Har_00048771	gi|169598956|ref|XP_001792901.1|hypothetical protein SNOG_02289 [Phaeosphaeria nodorum SN15] >gi|160704506|gb|EAT90501.2| hypothetical protein SNOG_02289 [Phaeosphaeria nodorum SN15]
0.001824	0.0425161	1	0.48481	0.424197	0.66614	Har_00015677	Har_00015677	gi|157111941|ref|XP_001651759.1|hypothetical protein AaeL_AAEL006002 [Aedes aegypti] >gi|108878230|gb|EAT42455.1| conserved hypothetical protein [Aedes aegypti]
0.000748	0.0263666	1	0.622463	0.337926	0.651014	Har_00075856	Har_00075856	gi|23208546|gb|AAN15790.1|heat shock-like protein [Galleria mellonella]
0.000381	0.0188088	1	0.659722	0.263439	1.27076	Har_00048565	Har_00048565	gi|154707830|gb|AAU84716.2|triosephosphate isomerase [Helicoverpa armigera]
0.001688	0.0406884	1	0.793196	0.274438	0.627697	Har_00043151	Har_00043151	gi|122894086|gb|ABM67689.1|chemosensory protein CSP2 [Spodoptera exigua]
0.002523	0.0493469	1	0.504613	0.414117	0.653745	Har_00126875	Har_00126875	na
6.2e-05	0.008246	1	0.555612	0.416561	0.589789	Har_00016603	Har_00016603	gi|211939903|gb|ACJ13432.1|proteasome subunit beta 7 [Helicoverpa armigera]
0.001679	0.0405579	1	0.513669	0.492274	0.538794	Har_00016026	Har_00016026	gi|91087659|ref|XP_973571.1|PREDICTED: similar to predicted protein [Tribolium castaneum]
0.00017	0.0129418	1	0.5862	0.317101	0.732301	Har_00113349	Har_00113349	gi|66566142|ref|XP_395612.2|PREDICTED: similar to Ras suppressor-1 CG9031-PA [Apis mellifera]
2.5e-05	0.00609181	1	0.562529	0.505667	0.477125	Har_00117816	Har_00117816	gi|215820606|ref|NP_001135962.1|autophagy related protein Atg6 [Bombyx mori] >gi|213390046|gb|ACJ46062.1| autophagy related protein Atg6 [Bombyx mori]
6.1e-05	0.00823409	1	0.598661	0.282437	0.79861	Har_00216588	Har_00216588	na
0.000917	0.0293674	1	0.516106	0.285654	0.913091	Har_00087203	Har_00087203	gi|212505602|gb|EEB10021.1|transcriptional activator HAP2, putative [Pediculus humanus corporis]
0.000257	0.0157048	1	0.540354	0.498977	0.498286	Har_00032554	Har_00032554	gi|91087761|ref|XP_974991.1|PREDICTED: similar to predicted protein [Tribolium castaneum]
0.000117	0.0110454	1	0.924385	0.186229	1.28195	Har_00097942	Har_00097942	gi|91078970|ref|XP_974395.1|PREDICTED: similar to AGAP009604-PA [Tribolium castaneum]
0.00212	0.0456724	1	0.515149	0.462268	0.562374	Har_00085759	Har_00085759	gi|114051712|ref|NP_001040327.1|ras-related protein 2 [Bombyx mori] >gi|87248589|gb|ABD36347.1| ras-related protein 2 [Bombyx mori]
0.000388	0.0190503	1	0.538238	0.393567	0.631704	Har_00089775	Har_00089775	gi|195588023|ref|XP_002083760.1|GD13178 [Drosophila simulans] >gi|194195769|gb|EDX09345.1| GD13178 [Drosophila simulans]
0.000341	0.0179094	1	0.548436	0.303378	0.802524	Har_00003305	Har_00003305	na
0.002004	0.0441622	1	0.553057	0.327288	0.733833	Har_00016112	Har_00016112	gi|148907380|gb|ABR16824.1|unknown [Picea sitchensis]
3.7e-05	0.0069138	1	0.68285	0.239698	0.808836	Har_00109013	Har_00109013	gi|6560635|gb|AAF16695.1|AF117573_1thioredoxin-like protein [Manduca sexta]
0.000162	0.0127402	1	0.371113	0.388824	0.913964	Har_00102074	Har_00102074	gi|91093369|ref|XP_969810.1|PREDICTED: similar to conserved hypothetical protein [Tribolium castaneum]
0.000285	0.0165481	1	0.406178	0.423946	0.762719	Har_00087460	Har_00087460	gi|114052775|ref|NP_001040275.1|ring box protein [Bombyx mori] >gi|87248591|gb|ABD36348.1| ring box protein [Bombyx mori]
0.002085	0.0453287	1	0.576116	0.349846	0.6507	Har_00000524	Har_00000524	gi|115271086|gb|ABI84381.1|gossypol-induced cytochrome P450 [Helicoverpa armigera]
0.001676	0.0405071	1	0.565689	0.495596	0.467744	Har_00058128	Har_00058128	gi|156544241|ref|XP_001606829.1|PREDICTED: similar to cullin 1 [Nasonia vitripennis]
0.001207	0.0339431	1	0.589661	0.395175	0.558133	Har_00197972	Har_00197972	na
0.000814	0.0272862	1	0.550021	0.311793	0.756777	Har_00112272	Har_00112272	gi|6016425|sp|O76485.1|CSK2B_SPOFRRecName: Full=Casein kinase II subunit beta; Short=CK II beta >gi|3249057|gb|AAC24042.1| casein kinase II beta subunit [Spodoptera frugiperda]
0.001	0.0307927	1	0.521117	0.445621	0.558756	Har_00058617	Har_00058617	gi|53148461|dbj|BAD52258.1|proteasome alpha 4 subunit [Plutella xylostella]
6e-06	0.00301467	1	0.497373	0.367234	0.709217	Har_00084170	Har_00084170	gi|114053181|ref|NP_001040529.1|H2A histone family member V [Bombyx mori] >gi|95102886|gb|ABF51384.1| H2A histone family member V [Bombyx mori] >gi|157073865|dbj|BAF79922.1| histone H2A.Z [Bombyx mori]
0.000783	0.0268848	1	0.450466	0.417563	0.687376	Har_00108563	Har_00108563	gi|114051245|ref|NP_001040387.1|proteasome alpha 3 subunit [Bombyx mori] >gi|95102712|gb|ABF51297.1| proteasome alpha 3 subunit [Bombyx mori]
7.3e-05	0.00887382	1	0.466986	0.370908	0.743314	Har_00026207	Har_00026207	gi|47206080|emb|CAF90372.1|unnamed protein product [Tetraodon nigroviridis]
0.001385	0.0365614	1	0.561645	0.514485	0.443883	Har_00004460	Har_00004460	gi|114052034|ref|NP_001040204.1|proteasome beta-subunit [Bombyx mori] >gi|87248385|gb|ABD36245.1| proteasome beta-subunit [Bombyx mori]
0.000158	0.0126233	1	0.430102	0.311247	1.04802	Har_00066742	Har_00066742	gi|157125378|ref|XP_001654311.1|hypothetical protein AaeL_AAEL001944 [Aedes aegypti] >gi|157130953|ref|XP_001662095.1| hypothetical protein AaeL_AAEL011938 [Aedes aegypti] >gi|108871713|gb|EAT35938.1| conserved hypothetical protein [Aedes aegypti] >g
0.000123	0.0113278	1	0.731079	1.66776	0.291335	Har_00191342	Har_00191342	na
0.000259	0.0157631	1	0.599696	0.335105	0.63546	Har_00058201	Har_00058201	gi|195128641|ref|XP_002008770.1|GI13677 [Drosophila mojavensis] >gi|193920379|gb|EDW19246.1| GI13677 [Drosophila mojavensis]
0.001596	0.0395025	1	0.612482	0.36577	0.569605	Har_00032136	Har_00032136	gi|223890174|ref|NP_001138802.1|JAB-MPN domain protein [Bombyx mori] >gi|221579605|gb|ACM24339.1| JAB-MPN domain protein [Bombyx mori]
2.1e-05	0.00582589	1	0.562692	0.277685	0.815479	Har_00113874	Har_00113874	gi|66566142|ref|XP_395612.2|PREDICTED: similar to Ras suppressor-1 CG9031-PA [Apis mellifera]
0.001103	0.0320224	1	0.614304	0.289229	0.71619	Har_00040341	Har_00040341	gi|195491006|ref|XP_002093380.1|GE20793 [Drosophila yakuba] >gi|194179481|gb|EDW93092.1| GE20793 [Drosophila yakuba]
0.001242	0.0344771	1	0.682381	0.253994	1.36347	Har_00019848	Har_00019848	gi|148298667|ref|NP_001091760.1|signal sequence receptor [Bombyx mori] >gi|87248609|gb|ABD36357.1| signal sequence receptor [Bombyx mori]
0.002152	0.0460275	1	0.52531	0.394832	0.612495	Har_00055833	Har_00055833	na
0.000287	0.0165481	1	0.75912	0.184631	1.10356	Har_00068607	Har_00068607	gi|195446117|ref|XP_002070635.1|GK12172 [Drosophila willistoni] >gi|194166720|gb|EDW81621.1| GK12172 [Drosophila willistoni]
0.000113	0.010872	1	0.417179	0.359577	1.18113	Har_00065161	Har_00065161	gi|189237595|ref|XP_966729.2|PREDICTED: similar to 5-aminolevulinic acid synthase [Tribolium castaneum]
0.000546	0.0227136	1	0.47776	0.469031	0.566368	Har_00222454	Har_00222454	na
0.001959	0.0436384	1	0.60643	0.320231	0.653403	Har_00092427	Har_00092427	gi|116491877|ref|YP_803612.1|subtilisin-like serine protease [Pediococcus pentosaceus ATCC 25745] >gi|116102027|gb|ABJ67170.1| Subtilisin-like serine protease [Pediococcus pentosaceus ATCC 25745]
0.000439	0.0205078	1	0.596566	0.276796	0.767606	Har_00219055	Har_00219055	na
0.001723	0.041268	1	0.603973	0.379525	0.552205	Har_00115925	Har_00115925	gi|91090107|ref|XP_970931.1|PREDICTED: similar to acylpeptide hydrolase [Tribolium castaneum]
5.7e-05	0.00798	1	0.522166	0.454399	0.530921	Har_00103203	Har_00103203	gi|211939903|gb|ACJ13432.1|proteasome subunit beta 7 [Helicoverpa armigera]
6e-06	0.00301467	1	0.434452	0.302341	1.04618	Har_00021298	Har_00021298	gi|91079562|ref|XP_966370.1|PREDICTED: similar to iodotyrosine dehalogenase 1, partial [Tribolium castaneum]
5.7e-05	0.00798	1	0.678785	0.363267	1.96956	Har_00090712	Har_00090712	gi|114051530|ref|NP_001040356.1|cytidylate kinase [Bombyx mori] >gi|95102618|gb|ABF51247.1| cytidylate kinase [Bombyx mori]
0.001745	0.0414873	1	0.481027	0.318693	0.816226	Har_00120646	Har_00120646	gi|168823405|ref|NP_001108336.1|Glycerol kinase-2 [Bombyx mori] >gi|167466116|dbj|BAG06922.1| Glycerol kinase-2 [Bombyx mori]
0.000367	0.0185843	1	0.615099	0.347253	1.71283	Har_00217612	Har_00217612	na
0.000191	0.0135589	1	1.53887	0.346447	1.80595	Har_00095363	Har_00095363	gi|195441642|ref|XP_002068613.1|GK20568 [Drosophila willistoni] >gi|194164698|gb|EDW79599.1| GK20568 [Drosophila willistoni]
0.002562	0.0497847	1	0.655971	0.297647	0.638038	Har_00021582	Har_00021582	gi|195445597|ref|XP_002070398.1|GK11050 [Drosophila willistoni] >gi|194166483|gb|EDW81384.1| GK11050 [Drosophila willistoni]
0.002264	0.0469832	1	0.476822	0.43035	0.606688	Har_00082311	Har_00082311	gi|91089735|ref|XP_975116.1|PREDICTED: similar to AGAP003567-PA [Tribolium castaneum]
0.000397	0.0192209	1	0.784829	0.202393	0.783378	Har_00044564	Har_00044564	gi|26007526|gb|AAF71290.2|AF255919_1chemosensory protein [Mamestra brassicae]
0.001634	0.0399215	1	0.752045	1.62473	0.268531	Har_00046193	Har_00046193	na
0.001175	0.0334173	1	0.461607	0.391224	0.687345	Har_00225127	Har_00225127	na
0.002138	0.0459726	1	0.482779	0.469807	0.5471	Har_00084033	Har_00084033	gi|212510607|gb|EEB13743.1|WD-repeat protein, putative [Pediculus humanus corporis]
0.002055	0.0447841	1	0.674208	0.245809	0.746219	Har_00077492	Har_00077492	gi|66505114|ref|XP_624237.1|PREDICTED: similar to CG18547-PA [Apis mellifera]
0.002414	0.0484172	1	0.571375	0.357184	0.605293	Har_00084307	Har_00084307	gi|124365239|gb|ABN09648.1|apoptosis-linked protein 2 [Bombyx mori]
0.001636	0.0399244	1	0.642706	0.339367	0.565724	Har_00083723	Har_00083723	gi|148298818|ref|NP_001091784.1|multi-binding protein [Bombyx mori] >gi|112982635|dbj|BAF03496.1| multi-binding protein [Bombyx mori]
0.000304	0.0168881	1	0.552578	0.610016	0.365307	Har_00231905	Har_00231905	na
0.000341	0.0179094	1	0.3491	0.918028	0.380258	Har_00097165	Har_00097165	gi|153791339|ref|NP_001093283.1|mRNA transport regulator 3 [Bombyx mori] >gi|95103116|gb|ABF51499.1| mRNA transport regulator 3 [Bombyx mori]
0.002338	0.0477095	1	0.649531	0.294999	0.63545	Har_00216584	Har_00216584	na
9.7e-05	0.00999166	1	0.41106	0.373291	1.26882	Har_00091911	Har_00091911	gi|170032272|ref|XP_001844006.1|ribonucleoside-diphosphate reductase small chain [Culex quinquefasciatus] >gi|167872122|gb|EDS35505.1| ribonucleoside-diphosphate reductase small chain [Culex quinquefasciatus]
0.001178	0.0334605	1	0.480447	0.275242	1.09506	Har_00060560	Har_00060560	gi|45553223|ref|NP_996139.1|CG33290 [Drosophila melanogaster] >gi|41618334|tpg|DAA03106.1| TPA_inf: HDC11369 [Drosophila melanogaster] >gi|45446067|gb|AAS65091.1| CG33290 [Drosophila melanogaster] >gi|157816590|gb|ABV82288.1| IP19829p [Drosophila mel
0.000203	0.0138415	1	0.388181	1.86644	0.580211	Har_00134657	Har_00134657	na
0.000948	0.029999	1	0.379218	0.448896	0.706813	Har_00117742	Har_00117742	gi|158300450|ref|XP_320369.4|AGAP012165-PA [Anopheles gambiae str. PEST] >gi|157013165|gb|EAA43295.4| AGAP012165-PA [Anopheles gambiae str. PEST]
2e-06	0.00210326	1	0.485751	0.309174	0.799977	Har_00117602	Har_00117602	gi|215511125|gb|EEC20578.1|alpha tubulin [Ixodes scapularis]
0.001026	0.0310755	1	0.530955	0.386087	0.585423	Har_00204046	Har_00204046	na
0.00016	0.0126269	1	0.484232	0.496137	0.497204	Har_00061989	Har_00061989	gi|114052162|ref|NP_001040460.1|proteasome beta 3 subunit [Bombyx mori] >gi|95102980|gb|ABF51431.1| proteasome beta 3 subunit [Bombyx mori]
0.000864	0.0282707	1	0.498308	0.486378	0.490851	Har_00239902	Har_00239902	na
0.000138	0.0120238	1	0.455229	0.302663	0.863094	Har_00052207	Har_00052207	gi|151301107|ref|NP_001093083.1|eukaryotic translation initiation factor 1A [Bombyx mori] >gi|87248491|gb|ABD36298.1| eukaryotic translation initiation factor 1A [Bombyx mori]
0.001107	0.0320683	1	0.511881	0.44191	0.525434	Har_00053026	Har_00053026	gi|91093363|ref|XP_969584.1|PREDICTED: similar to CG10576 CG10576-PA [Tribolium castaneum]
0.000156	0.0126102	1	0.530255	0.440556	0.506192	Har_00040611	Har_00040611	gi|4090872|gb|AAD09285.1|putative serpin [Hyphantria cunea] >gi|5163416|gb|AAD40672.1| serpin [Hyphantria cunea]
5.1e-05	0.00751212	1	0.63035	0.246224	0.759225	Har_00235210	Har_00235210	na
0.000565	0.0231635	1	0.521008	0.314546	0.718975	Har_00026695	Har_00026695	gi|195025691|ref|XP_001986107.1|GH20714 [Drosophila grimshawi] >gi|193902107|gb|EDW00974.1| GH20714 [Drosophila grimshawi]
0.000374	0.0186876	1	0.401513	0.799173	0.365218	Har_00231925	Har_00231925	na
0.000466	0.0210515	1	0.374908	0.336614	0.925075	Har_00092669	Har_00092669	gi|118792332|ref|XP_320268.3|AGAP012271-PA [Anopheles gambiae str. PEST] >gi|116116849|gb|EAA00240.3| AGAP012271-PA [Anopheles gambiae str. PEST]
0.002033	0.0444977	1	0.644003	0.343731	0.526079	Har_00196367	Har_00196367	na
0.00053	0.022525	1	0.501613	0.546754	0.424448	Har_00070963	Har_00070963	gi|110756893|ref|XP_396452.3|PREDICTED: similar to CG6643-PA, isoform A [Apis mellifera]
0.000181	0.0133172	1	0.428036	0.302517	0.897504	Har_00042795	Har_00042795	gi|160333474|ref|NP_001103767.1|lysosomal thiol reductase IP30 isoform 2 [Bombyx mori] >gi|87248349|gb|ABD36227.1| lysosomal thiol reductase IP30 precursor isoform 2 [Bombyx mori]
0.002321	0.0476205	1	0.644506	0.229436	0.783911	Har_00008543	Har_00008543	gi|212513898|gb|EEB16305.1|isocitrate dehydrogenase NAD, subunit alphaputative [Pediculus humanus corporis]
0.00087	0.0284259	1	0.557897	0.27273	0.76059	Har_00002993	Har_00002993	gi|47027898|gb|AAT08972.1|cytochrome P450 [Helicoverpa armigera]
0.000317	0.0172708	1	0.552228	0.32735	0.637984	Har_00091499	Har_00091499	gi|170069501|ref|XP_001869248.1|conserved hypothetical protein [Culex quinquefasciatus] >gi|167865439|gb|EDS28822.1| conserved hypothetical protein [Culex quinquefasciatus]
6.5e-05	0.00837407	1	0.418083	0.563103	0.487864	Har_00050867	Har_00050867	gi|112983539|ref|NP_001036881.1|annexin B13 [Bombyx mori] >gi|17298129|dbj|BAB78533.1| annexin B13a [Bombyx mori]
0.000838	0.0277006	1	0.515488	0.356072	0.625582	Har_00063078	Har_00063078	na
3.3e-05	0.00676368	1	0.448242	0.370483	0.690838	Har_00102714	Har_00102714	gi|114052472|ref|NP_001040479.1|peptidylprolyl isomerase B [Bombyx mori] >gi|95103068|gb|ABF51475.1| peptidylprolyl isomerase B [Bombyx mori]
0.000377	0.0187546	1	0.560451	0.241175	0.848567	Har_00018244	Har_00018244	gi|112983824|ref|NP_001036859.1|ecdysteroid-inducible angiotensin-converting enzyme-related gene product [Bombyx mori] >gi|8918492|dbj|BAA97657.1| BmAcer [Bombyx mori]
0.000914	0.029292	1	0.508476	0.312641	0.721499	Har_00091496	Har_00091496	gi|170069501|ref|XP_001869248.1|conserved hypothetical protein [Culex quinquefasciatus] >gi|167865439|gb|EDS28822.1| conserved hypothetical protein [Culex quinquefasciatus]
0.00016	0.0126269	1	0.561633	0.320246	0.636897	Har_00086429	Har_00086429	gi|114053265|ref|NP_001040284.1|ubiquitin conjugating enzyme isoform 1 [Bombyx mori] >gi|87248633|gb|ABD36369.1| ubiquitin conjugating enzyme isoform 1 [Bombyx mori]
0.000359	0.0184897	1	0.557089	0.335551	0.612707	Har_00128241	Har_00128241	na
0.000225	0.0145558	1	0.397025	0.563435	0.511721	Har_00066291	Har_00066291	gi|66509809|ref|XP_625119.1|PREDICTED: hypothetical protein [Apis mellifera]
7.2e-05	0.00887382	1	0.476877	0.292293	1.21838	Har_00112644	Har_00112644	gi|189237595|ref|XP_966729.2|PREDICTED: similar to 5-aminolevulinic acid synthase [Tribolium castaneum]
0.001301	0.0355261	1	0.509598	0.351211	0.637135	Har_00062497	Har_00062497	gi|91081631|ref|XP_967506.1|PREDICTED: similar to AGAP006951-PA [Tribolium castaneum]
2.4e-05	0.00609181	1	0.675847	0.206928	0.814957	Har_00065840	Har_00065840	gi|91094307|ref|XP_972149.1|PREDICTED: similar to GA18629-PA [Tribolium castaneum]
0.002014	0.0442747	1	0.633357	0.271725	0.662114	Har_00116890	Har_00116890	gi|149724681|ref|XP_001503992.1|PREDICTED: similar to Notchless protein homolog 1 [Equus caballus]
0.000115	0.0109711	1	0.628664	1.94155	0.351745	Har_00227128	Har_00227128	na
0.000202	0.0138401	1	0.593072	0.365334	0.525513	Har_00003794	Har_00003794	gi|29169220|gb|AAO65963.1|casein kinase I [Helicoverpa zea]
0.000283	0.0165481	1	0.498664	0.241004	0.94524	Har_00019627	Har_00019627	gi|91083251|ref|XP_974045.1|PREDICTED: similar to DEAD box ATP-dependent RNA helicase [Tribolium castaneum]
0	0	1	0.396406	0.285324	1.00246	Har_00086593	Har_00086593	gi|112983082|ref|NP_001037668.1|cytosolic juvenile hormone binding protein 36 kDa subunit [Bombyx mori] >gi|6625562|gb|AAF19266.1|AF098303_1 cytosolic juvenile hormone binding protein 36 kDa subunit [Bombyx mori]
0.000346	0.0180671	1	0.503224	0.269941	0.826704	Har_00032536	Har_00032536	gi|170038495|ref|XP_001847085.1|leucine-rich repeat-containing protein [Culex quinquefasciatus] >gi|167882195|gb|EDS45578.1| leucine-rich repeat-containing protein [Culex quinquefasciatus]
0.001024	0.0310357	1	0.557286	0.258175	0.779067	Har_00095606	Har_00095606	gi|195449437|ref|XP_002072074.1|GK22516 [Drosophila willistoni] >gi|194168159|gb|EDW83060.1| GK22516 [Drosophila willistoni]
0.001169	0.0333515	1	0.324142	0.378345	0.913657	Har_00033548	Har_00033548	gi|126334727|ref|XP_001372394.1|PREDICTED: similar to RFK protein [Monodelphis domestica]
0.000371	0.0186407	1	0.530906	0.255728	0.825259	Har_00016108	Har_00016108	na
1.8e-05	0.00528545	1	0.361659	0.31354	1.01282	Har_00021299	Har_00021299	gi|91079562|ref|XP_966370.1|PREDICTED: similar to iodotyrosine dehalogenase 1, partial [Tribolium castaneum]
5.9e-05	0.00808479	1	0.417155	0.289047	0.926851	Har_00231428	Har_00231428	na
0.001974	0.0438006	1	0.522495	0.434461	0.492307	Har_00048868	Har_00048868	gi|183979366|dbj|BAG30735.1|similar to CG31523-PA [Papilio xuthus]
0.0023	0.0473175	1	0.5065	0.336899	0.654057	Har_00005841	Har_00005841	gi|95102778|gb|ABF51330.1|ubiquitin-conjugating enzyme E2 isoform 2 [Bombyx mori]
0.000368	0.0185933	1	0.645775	0.285478	0.605297	Har_00001555	Har_00001555	gi|116833215|gb|ABK29520.1|CG13607-PA-like protein [Helicoverpa armigera]
7.9e-05	0.00915995	1	0.411355	0.522094	0.516095	Har_00093000	Har_00093000	gi|157130512|ref|XP_001661906.1|hypothetical protein AaeL_AAEL011782 [Aedes aegypti] >gi|108871890|gb|EAT36115.1| conserved hypothetical protein [Aedes aegypti]
8.9e-05	0.00972121	1	0.578284	0.319656	0.598947	Har_00061530	Har_00061530	gi|125987245|ref|XP_001357385.1|GA18577 [Drosophila pseudoobscura pseudoobscura] >gi|54645716|gb|EAL34454.1| GA18577 [Drosophila pseudoobscura pseudoobscura]
0.000997	0.0307743	1	0.713562	0.18458	1.19406	Har_00033102	Har_00033102	gi|58376764|ref|XP_308839.2|AGAP006918-PA [Anopheles gambiae str. PEST] >gi|55245924|gb|EAA04092.2| AGAP006918-PA [Anopheles gambiae str. PEST]
0.000467	0.0210756	1	0.484948	0.438799	0.518343	Har_00021512	Har_00021512	gi|158286215|ref|XP_308626.4|AGAP007135-PA [Anopheles gambiae str. PEST] >gi|157020362|gb|EAA04156.5| AGAP007135-PA [Anopheles gambiae str. PEST]
0.00148	0.0376833	1	0.709198	0.232311	0.669247	Har_00032861	Har_00032861	gi|114051804|ref|NP_001040182.1|high-affinity copper uptake protein 1 [Bombyx mori] >gi|87248305|gb|ABD36205.1| high-affinity copper uptake protein 1 [Bombyx mori]
0.001878	0.0429556	1	0.450605	0.345458	0.7082	Har_00049772	Har_00049772	gi|114052607|ref|NP_001040485.1|SUMO-1 activating enzyme [Bombyx mori] >gi|95103086|gb|ABF51484.1| SUMO-1 activating enzyme [Bombyx mori]
6e-06	0.00301467	1	0.50188	0.341109	0.642275	Har_00021857	Har_00021857	gi|170032252|ref|XP_001843996.1|cubilin [Culex quinquefasciatus] >gi|167872112|gb|EDS35495.1| cubilin [Culex quinquefasciatus]
0.000751	0.0263666	1	0.54545	0.250949	0.802426	Har_00002992	Har_00002992	gi|47027900|gb|AAT08973.1|cytochrome P450 [Helicoverpa armigera]
0.000355	0.0183674	1	0.575972	0.213874	1.12261	Har_00150077	Har_00150077	gi|189241337|ref|XP_969214.2|PREDICTED: similar to integrin beta subunit (AGAP000815-PA) [Tribolium castaneum]
0.001798	0.0420417	1	0.566299	0.235184	0.820878	Har_00019621	Har_00019621	gi|91083251|ref|XP_974045.1|PREDICTED: similar to DEAD box ATP-dependent RNA helicase [Tribolium castaneum]
0.000609	0.0239261	1	0.520005	0.272947	0.767804	Har_00002986	Har_00002986	gi|47606854|gb|AAT36348.1|cytochrome P450 CYP4 [Helicoverpa armigera]
0.000338	0.0178347	1	0.578152	0.300604	1.60016	Har_00044861	Har_00044861	gi|91076494|ref|XP_972946.1|PREDICTED: similar to Protein CREG1 precursor (Cellular repressor of E1A-stimulated genes 1) [Tribolium castaneum]
0.002423	0.0484172	1	0.562689	0.977575	0.197443	Har_00015351	Har_00015351	gi|170032192|ref|XP_001843966.1|sugar transporter [Culex quinquefasciatus] >gi|167872082|gb|EDS35465.1| sugar transporter [Culex quinquefasciatus]
0.001048	0.0313406	1	0.506183	0.268902	0.79568	Har_00102516	Har_00102516	gi|163838692|ref|NP_001106229.1|Mod(mdg4)-heS00531 [Bombyx mori] >gi|47169616|tpe|CAE54311.1| TPA: Mod(mdg4)-heS00531 [Bombyx mori]
0.000494	0.0217726	1	0.54359	0.310118	0.641246	Har_00008783	Har_00008783	gi|163838692|ref|NP_001106229.1|Mod(mdg4)-heS00531 [Bombyx mori] >gi|47169616|tpe|CAE54311.1| TPA: Mod(mdg4)-heS00531 [Bombyx mori]
0.000829	0.0275642	1	0.535322	0.275081	1.36282	Har_00017005	Har_00017005	gi|62002225|gb|AAX58712.1|pheromone-degrading enzyme 2 [Antheraea polyphemus]
0.002567	0.0498177	1	0.428632	1.42127	0.357331	Har_00061063	Har_00061063	gi|195394848|ref|XP_002056051.1|GJ10725 [Drosophila virilis] >gi|194142760|gb|EDW59163.1| GJ10725 [Drosophila virilis]
0.000738	0.0262155	1	0.48524	0.373427	0.59415	Har_00081241	Har_00081241	gi|53148461|dbj|BAD52258.1|proteasome alpha 4 subunit [Plutella xylostella]
0.000812	0.0272798	1	0.46718	0.396123	0.580498	Har_00094271	Har_00094271	gi|189239994|ref|XP_969274.2|PREDICTED: similar to 28 kDa heat- and acid-stable phosphoprotein [Tribolium castaneum]
0.002347	0.0478285	1	0.512581	0.274038	0.763519	Har_00021358	Har_00021358	gi|195118098|ref|XP_002003577.1|GI21901 [Drosophila mojavensis] >gi|195388486|ref|XP_002052911.1| GJ17817 [Drosophila virilis] >gi|193914152|gb|EDW13019.1| GI21901 [Drosophila mojavensis] >gi|194149368|gb|EDW65066.1| GJ17817 [Drosophila virilis]
0.000328	0.0175736	1	0.317813	0.399991	0.839545	Har_00201998	Har_00201998	na
0.001866	0.0429464	1	0.615756	0.426127	0.405699	Har_00060712	Har_00060712	gi|189238490|ref|XP_001809098.1|PREDICTED: similar to CG31374 CG31374-PB [Tribolium castaneum]
4e-05	0.00709333	1	0.494647	0.329317	0.652021	Har_00043209	Har_00043209	gi|114052472|ref|NP_001040479.1|peptidylprolyl isomerase B [Bombyx mori] >gi|95103068|gb|ABF51475.1| peptidylprolyl isomerase B [Bombyx mori]
0.000542	0.0227136	1	0.55889	0.293535	0.647046	Har_00093474	Har_00093474	gi|114051598|ref|NP_001040416.1|leukotriene A4 hydrolase [Bombyx mori] >gi|95102808|gb|ABF51345.1| leukotriene A4 hydrolase [Bombyx mori]
0.001017	0.0309784	1	0.431713	0.31152	0.78406	Har_00035100	Har_00035100	gi|208972529|gb|ACI32825.1|beta-1,3-glucan recognition protein 1 [Helicoverpa armigera]
0.000118	0.0111166	1	0.82766	1.50619	0.1914	Har_00227682	Har_00227682	na
0.002226	0.0465144	1	0.479495	0.408619	0.536488	Har_00062389	Har_00062389	gi|156542315|ref|XP_001599442.1|PREDICTED: similar to CG17985-PA [Nasonia vitripennis]
1.1e-05	0.0042881	1	0.522876	0.403251	0.498205	Har_00063809	Har_00063809	gi|91094331|ref|XP_966352.1|PREDICTED: similar to ubiquitin-activating enzyme E1 [Tribolium castaneum]
0.002531	0.0494606	1	0.519408	0.340329	0.592684	Har_00101003	Har_00101003	gi|195168048|ref|XP_002024844.1|GL17886 [Drosophila persimilis] >gi|198462934|ref|XP_001352623.2| GA19054 [Drosophila pseudoobscura pseudoobscura] >gi|194108274|gb|EDW30317.1| GL17886 [Drosophila persimilis] >gi|198151040|gb|EAL30121.2| GA19054 [Dros
0.00018	0.0133172	1	0.484612	0.386948	0.558647	Har_00083984	Har_00083984	gi|212510022|gb|EEB13282.1|N-terminal acetyltransferase complex Ard1 subunit, putative [Pediculus humanus corporis]
0.002342	0.0477481	1	0.443043	0.269239	0.877105	Har_00089328	Har_00089328	gi|156554809|ref|XP_001606183.1|PREDICTED: similar to CRALBP [Nasonia vitripennis]
0.001488	0.0377595	1	0.669616	0.438859	0.355344	Har_00105203	Har_00105203	gi|91093199|ref|XP_969223.1|PREDICTED: hypothetical protein [Tribolium castaneum]
0.001091	0.0319527	1	0.533679	0.308532	0.630561	Har_00115273	Har_00115273	gi|114051598|ref|NP_001040416.1|leukotriene A4 hydrolase [Bombyx mori] >gi|95102808|gb|ABF51345.1| leukotriene A4 hydrolase [Bombyx mori]
0.000688	0.0254178	1	0.492652	0.388533	0.542137	Har_00067909	Har_00067909	gi|91087659|ref|XP_973571.1|PREDICTED: similar to predicted protein [Tribolium castaneum]
9e-05	0.00975971	1	0.600926	1.45166	0.250208	Har_00006783	Har_00006783	gi|91085193|ref|XP_971694.1|PREDICTED: similar to AGAP003352-PA [Tribolium castaneum]
0.000532	0.0225464	1	0.515821	0.343946	0.58337	Har_00005149	Har_00005149	gi|83595239|gb|ABC25071.1|inhibitor of apoptosis 2 protein [Glossina morsitans morsitans]
6.2e-05	0.008246	1	0.46956	0.370021	0.595045	Har_00088519	Har_00088519	gi|215490837|gb|EEC00478.1|WD-repeat protein, putative [Ixodes scapularis]
0.000468	0.0210786	1	0.562623	0.229595	1.24965	Har_00099404	Har_00099404	gi|91076494|ref|XP_972946.1|PREDICTED: similar to Protein CREG1 precursor (Cellular repressor of E1A-stimulated genes 1) [Tribolium castaneum]
0.000595	0.0236639	1	0.423398	0.300729	0.811377	Har_00051811	Har_00051811	gi|114051652|ref|NP_001040170.1|trafficking protein particle complex subunit 3 [Bombyx mori] >gi|87248271|gb|ABD36188.1| trafficking protein particle complex subunit 3 [Bombyx mori]
1.4e-05	0.00462102	1	0.599811	0.215527	1.25348	Har_00076086	Har_00076086	gi|156555350|ref|XP_001604790.1|PREDICTED: similar to glutamate carboxypeptidase [Nasonia vitripennis]
0.002151	0.0460275	1	0.464138	0.803009	0.27639	Har_00113777	Har_00113777	gi|212516976|gb|EEB18930.1|proton-coupled amino acid transporter, putative [Pediculus humanus corporis]
0.00133	0.0357566	1	0.560235	0.228104	0.805625	Har_00028765	Har_00028765	gi|91087357|ref|XP_975625.1|PREDICTED: similar to ADP-ribosylation factor-like protein 2 [Tribolium castaneum]
0.000361	0.0184968	1	0.568239	0.369186	0.489062	Har_00001408	Har_00001408	gi|211939903|gb|ACJ13432.1|proteasome subunit beta 7 [Helicoverpa armigera]
8.7e-05	0.00972121	1	0.493396	0.359917	0.576173	Har_00081240	Har_00081240	gi|53148461|dbj|BAD52258.1|proteasome alpha 4 subunit [Plutella xylostella]
0.001908	0.0432047	1	0.51039	0.371862	0.53862	Har_00042109	Har_00042109	gi|157123090|ref|XP_001660002.1|ccr4-associated factor [Aedes aegypti] >gi|108874495|gb|EAT38720.1| ccr4-associated factor [Aedes aegypti]
0.000497	0.021841	1	0.49336	0.223989	1.08526	Har_00081503	Har_00081503	gi|114052765|ref|NP_001040278.1|stromal cell-derived factor 2 precursor [Bombyx mori] >gi|87248597|gb|ABD36351.1| stromal cell-derived factor 2 precursor [Bombyx mori]
0.001001	0.0307927	1	0.504173	0.253174	1.26064	Har_00099402	Har_00099402	gi|91076494|ref|XP_972946.1|PREDICTED: similar to Protein CREG1 precursor (Cellular repressor of E1A-stimulated genes 1) [Tribolium castaneum]
0.000255	0.0156037	1	0.54173	0.308689	0.604467	Har_00025477	Har_00025477	gi|123478057|ref|XP_001322193.1|retinitis pigmentosa GTPase regulator-like protein [Trichomonas vaginalis G3] >gi|121905034|gb|EAY09970.1| retinitis pigmentosa GTPase regulator-like protein, putative [Trichomonas vaginalis G3]
0.001885	0.0430286	1	0.870864	0.187367	1.61498	Har_00100353	Har_00100353	gi|158291235|ref|XP_312766.4|AGAP003081-PA [Anopheles gambiae str. PEST] >gi|157017680|gb|EAA08460.4| AGAP003081-PA [Anopheles gambiae str. PEST]
0.000119	0.0111643	1	0.590417	0.338163	0.503193	Har_00190108	Har_00190108	na
5.4e-05	0.007752	1	0.34688	0.326772	0.883037	Har_00122235	Har_00122235	na
0.000892	0.0288261	1	0.376002	0.36624	0.721515	Har_00085105	Har_00085105	gi|212510689|gb|EEB13814.1|L-aminoadipate-semialdehyde dehydrogenase, putative [Pediculus humanus corporis]
0.002228	0.0465144	1	0.503191	0.456832	0.432114	Har_00073312	Har_00073312	gi|170062088|ref|XP_001866517.1|26S protease regulatory subunit 6A [Culex quinquefasciatus] >gi|167880127|gb|EDS43510.1| 26S protease regulatory subunit 6A [Culex quinquefasciatus]
0.002087	0.0453503	1	0.586511	0.244292	0.692089	Har_00081165	Har_00081165	gi|158294455|ref|XP_315613.4|AGAP005600-PA [Anopheles gambiae str. PEST] >gi|157015573|gb|EAA11457.4| AGAP005600-PA [Anopheles gambiae str. PEST]
0.000176	0.0131767	1	0.490561	0.399882	0.503274	Har_00092629	Har_00092629	gi|189241070|ref|XP_001808548.1|PREDICTED: similar to AGAP007135-PA [Tribolium castaneum]
7.3e-05	0.00887382	1	0.626102	0.23089	1.47759	Har_00011637	Har_00011637	gi|91076494|ref|XP_972946.1|PREDICTED: similar to Protein CREG1 precursor (Cellular repressor of E1A-stimulated genes 1) [Tribolium castaneum]
0.000108	0.0105027	1	0.664564	0.183704	0.799966	Har_00230466	Har_00230466	na
0.000674	0.0251887	1	0.454713	0.332504	0.641275	Har_00053566	Har_00053566	gi|157783840|gb|ABV72691.1|nicotinic acetylcholine receptor alpha 9 subunit [Bombyx mori]
6.8e-05	0.00858927	1	0.491243	0.470573	0.419194	Har_00042338	Har_00042338	gi|212506177|gb|EEB10468.1|26S protease regulatory subunit 6A, putative [Pediculus humanus corporis]
0.002166	0.0460275	1	0.390294	0.289446	0.856908	Har_00058185	Har_00058185	gi|170030437|ref|XP_001843095.1|hypothetical protein CpipJ_CPIJ001317 [Culex quinquefasciatus] >gi|167867336|gb|EDS30719.1| hypothetical protein CpipJ_CPIJ001317 [Culex quinquefasciatus]
0.001172	0.033374	1	0.532724	0.187798	1.03529	Har_00238077	Har_00238077	na
0.001603	0.039623	1	0.499082	0.370855	0.521656	Har_00098608	Har_00098608	gi|208972533|gb|ACI32827.1|beta-1,3-glucan recognition protein 2b [Helicoverpa armigera]
0.001918	0.043301	1	0.403243	0.256192	1.07024	Har_00194596	Har_00194596	na
0.000905	0.0290448	1	0.387355	0.573478	0.434498	Har_00011920	Har_00011920	gi|156547313|ref|XP_001601697.1|PREDICTED: similar to procollagen-lysine,2-oxoglutarate 5-dioxygenase [Nasonia vitripennis]
0.001243	0.0344837	1	0.462559	0.226329	1.08858	Har_00044225	Har_00044225	gi|193598979|ref|XP_001950697.1|PREDICTED: similar to putative sugar transporter [Acyrthosiphon pisum]
0.002443	0.0485961	1	0.60837	0.410254	0.38405	Har_00010037	Har_00010037	gi|157132749|ref|XP_001656122.1|calcium-binding protein E63-1 [Aedes aegypti] >gi|108871096|gb|EAT35321.1| calcium-binding protein E63-1 [Aedes aegypti]
0.000636	0.0244557	1	0.440016	0.430729	0.505459	Har_00099000	Har_00099000	gi|194901270|ref|XP_001980175.1|GG20037 [Drosophila erecta] >gi|190651878|gb|EDV49133.1| GG20037 [Drosophila erecta]
8.8e-05	0.00972121	1	0.405637	0.428198	0.551507	Har_00131693	Har_00131693	na
0.002379	0.0481511	1	0.484598	0.389501	0.507061	Har_00075358	Har_00075358	gi|156540692|ref|XP_001601021.1|PREDICTED: similar to ubiquitin-activating enzyme E1 [Nasonia vitripennis]
7e-06	0.00329729	1	0.466569	0.293703	0.692897	Har_00213953	Har_00213953	na
0.001914	0.0432539	1	0.518106	0.231158	0.791696	Har_00071121	Har_00071121	gi|189238710|ref|XP_969341.2|PREDICTED: similar to AGAP009638-PA [Tribolium castaneum]
6.9e-05	0.00861928	1	0.460135	0.279351	0.737308	Har_00049350	Har_00049350	gi|157112320|ref|XP_001657494.1|clathrin light chain [Aedes aegypti] >gi|108883767|gb|EAT47992.1| clathrin light chain [Aedes aegypti]
0.000114	0.0108987	1	0.511907	0.325896	0.562577	Har_00014464	Har_00014464	gi|66557450|ref|XP_397056.2|PREDICTED: similar to Rab-protein 14 CG4212-PA, isoform A isoform 1 [Apis mellifera]
0.001578	0.039272	1	0.343382	0.543887	0.502307	Har_00185229	Har_00185229	na
0.001864	0.0429464	1	0.380213	0.898979	0.271767	Har_00001309	Har_00001309	gi|195110913|ref|XP_002000024.1|GI24856 [Drosophila mojavensis] >gi|193916618|gb|EDW15485.1| GI24856 [Drosophila mojavensis]
4e-06	0.00254761	1	0.463874	0.308172	0.64964	Har_00095736	Har_00095736	gi|160333484|ref|NP_001103768.1|myosin light polypeptide 9 isoform B [Bombyx mori] >gi|87248543|gb|ABD36324.1| myosin light polypeptide 9 isoform 1 [Bombyx mori]
0.00016	0.0126269	1	0.608537	0.186845	0.8165	Har_00022165	Har_00022165	gi|110761744|ref|XP_623822.2|PREDICTED: similar to SPFH domain family, member 1 [Apis mellifera]
0.000485	0.0215651	1	0.453039	0.31537	0.648934	Har_00075412	Har_00075412	gi|66526670|ref|XP_624161.1|PREDICTED: similar to uninitiated CG4008-PA [Apis mellifera]
2.8e-05	0.0062993	1	0.267507	0.369549	1.07075	Har_00033635	Har_00033635	na
0.000677	0.0252417	1	0.569714	0.199182	1.22991	Har_00022381	Har_00022381	gi|170048086|ref|XP_001851529.1|glucosidase 2 subunit beta [Culex quinquefasciatus] >gi|167870281|gb|EDS33664.1| glucosidase 2 subunit beta [Culex quinquefasciatus]
0.00163	0.0399072	1	0.384541	0.264744	1.10373	Har_00075207	Har_00075207	gi|114051842|ref|NP_001040431.1|cyclic AMP-regulated protein [Bombyx mori] >gi|95102866|gb|ABF51374.1| cyclic AMP-regulated protein [Bombyx mori]
0.001737	0.0413624	1	0.347387	0.307798	0.862034	Har_00092667	Har_00092667	gi|118792332|ref|XP_320268.3|AGAP012271-PA [Anopheles gambiae str. PEST] >gi|116116849|gb|EAA00240.3| AGAP012271-PA [Anopheles gambiae str. PEST]
0.002423	0.0484172	1	0.562627	0.369611	0.439821	Har_00085653	Har_00085653	gi|170061451|ref|XP_001866238.1|conserved hypothetical protein [Culex quinquefasciatus] >gi|167879665|gb|EDS43048.1| conserved hypothetical protein [Culex quinquefasciatus]
0	0	1	0.896528	2.96936	0.0340989	Har_00183254	Har_00183254	na
0.000505	0.0219789	1	0.520334	0.348737	0.496343	Har_00090337	Har_00090337	gi|48097764|ref|XP_391945.1|PREDICTED: similar to Proteasome p44.5 subunit CG10149-PB, isoform B isoform 1 [Apis mellifera]
2.4e-05	0.00609181	1	0.414496	0.367314	0.591429	Har_00203611	Har_00203611	na
1.1e-05	0.0042881	1	0.568149	0.179895	0.876417	Har_00080192	Har_00080192	gi|26007526|gb|AAF71290.2|AF255919_1chemosensory protein [Mamestra brassicae]
0.000108	0.0105027	1	0.544261	0.201794	1.23035	Har_00044862	Har_00044862	gi|91076494|ref|XP_972946.1|PREDICTED: similar to Protein CREG1 precursor (Cellular repressor of E1A-stimulated genes 1) [Tribolium castaneum]
4e-05	0.00709333	1	0.373025	0.259057	1.08412	Har_00059768	Har_00059768	gi|94471815|gb|ABF21123.1|transferrin [Spodoptera litura]
0.00159	0.039462	1	0.470928	0.196766	1.04065	Har_00031504	Har_00031504	gi|157118102|ref|XP_001659009.1|short-chain dehydrogenase [Aedes aegypti] >gi|108875861|gb|EAT40086.1| short-chain dehydrogenase [Aedes aegypti]
0.00072	0.0258811	1	0.447168	0.317347	0.625577	Har_00004978	Har_00004978	gi|66519157|ref|XP_393468.2|PREDICTED: similar to CG17331-PA isoform 1 [Apis mellifera]
0.001068	0.0316481	1	0.430863	0.489449	0.420576	Har_00108985	Har_00108985	gi|170058281|ref|XP_001864853.1|conserved hypothetical protein [Culex quinquefasciatus] >gi|167877433|gb|EDS40816.1| conserved hypothetical protein [Culex quinquefasciatus]
0.000303	0.016874	1	0.763442	0.204208	1.75889	Har_00095728	Har_00095728	gi|148908742|gb|ABR17478.1|unknown [Picea sitchensis]
0.001254	0.0346613	1	0.389273	0.266794	1.18135	Har_00191693	Har_00191693	na
0.000206	0.0138415	1	0.437731	0.218464	1.09343	Har_00065158	Har_00065158	gi|189237595|ref|XP_966729.2|PREDICTED: similar to 5-aminolevulinic acid synthase [Tribolium castaneum]
0.000636	0.0244557	1	0.623724	0.196049	1.40421	Har_00118692	Har_00118692	gi|148298667|ref|NP_001091760.1|signal sequence receptor [Bombyx mori] >gi|87248609|gb|ABD36357.1| signal sequence receptor [Bombyx mori]
0.000259	0.0157631	1	0.383094	0.323704	0.701507	Har_00107757	Har_00107757	gi|114051245|ref|NP_001040387.1|proteasome alpha 3 subunit [Bombyx mori] >gi|95102712|gb|ABF51297.1| proteasome alpha 3 subunit [Bombyx mori]
0.001163	0.0332433	1	0.491979	0.375978	0.468293	Har_00031446	Har_00031446	gi|91087659|ref|XP_973571.1|PREDICTED: similar to predicted protein [Tribolium castaneum]
3.5e-05	0.00676368	1	0.53236	0.259524	0.626046	Har_00001557	Har_00001557	gi|116833215|gb|ABK29520.1|CG13607-PA-like protein [Helicoverpa armigera]
0.000733	0.0261145	1	0.468355	0.256437	0.719872	Har_00099703	Har_00099703	gi|170069501|ref|XP_001869248.1|conserved hypothetical protein [Culex quinquefasciatus] >gi|167865439|gb|EDS28822.1| conserved hypothetical protein [Culex quinquefasciatus]
9.7e-05	0.00999166	1	0.440364	0.347547	0.564607	Har_00108559	Har_00108559	gi|114051245|ref|NP_001040387.1|proteasome alpha 3 subunit [Bombyx mori] >gi|95102712|gb|ABF51297.1| proteasome alpha 3 subunit [Bombyx mori]
0.000281	0.0165024	1	0.399166	0.298055	0.725531	Har_00117192	Har_00117192	gi|114052607|ref|NP_001040485.1|SUMO-1 activating enzyme [Bombyx mori] >gi|95103086|gb|ABF51484.1| SUMO-1 activating enzyme [Bombyx mori]
7.5e-05	0.00899602	1	0.73541	0.95848	0.121951	Har_00187346	Har_00187346	na
0.000947	0.0299883	1	0.553176	0.302656	0.508995	Har_00085408	Har_00085408	gi|112983314|ref|NP_001037618.1|ras-related GTP-binding protein Rab11 [Bombyx mori] >gi|102993180|gb|ABF71467.1| ras-related GTP-binding protein Rab11 [Bombyx mori]
0.001893	0.0431242	1	0.439652	0.206406	1.0712	Har_00067041	Har_00067041	gi|189236792|ref|XP_966417.2|PREDICTED: similar to protein phosphatase 1, catalytic subunit, beta isoform 1 [Tribolium castaneum]
0.002133	0.0459087	1	0.454914	0.359696	0.517381	Har_00143574	Har_00143574	na
0.001782	0.0418608	1	0.598897	1.662	0.234619	Har_00016220	Har_00016220	gi|110762964|ref|XP_001122862.1|PREDICTED: similar to tetratricopeptide repeat domain 12 [Apis mellifera]
0.002398	0.0483664	1	0.444902	0.597761	0.316907	Har_00027585	Har_00027585	gi|212507171|gb|EEB11170.1|protein scarlet, putative [Pediculus humanus corporis]
0.000333	0.0177783	1	0.455299	0.245604	0.753275	Har_00076596	Har_00076596	na
1.3e-05	0.004522	1	0.471203	0.327928	0.541825	Har_00001405	Har_00001405	gi|211939905|gb|ACJ13433.1|proteasome subunit beta 1 [Helicoverpa armigera]
1.4e-05	0.00462102	1	0.399387	0.284768	0.734666	Har_00121025	Har_00121025	na
0.000955	0.0300732	1	0.37363	0.298995	0.747062	Har_00089327	Har_00089327	gi|156554809|ref|XP_001606183.1|PREDICTED: similar to CRALBP [Nasonia vitripennis]
5e-06	0.00279136	1	0.514693	0.334385	0.48404	Har_00054165	Har_00054165	gi|4090872|gb|AAD09285.1|putative serpin [Hyphantria cunea] >gi|5163416|gb|AAD40672.1| serpin [Hyphantria cunea]
0.000993	0.0307137	1	0.477574	0.210877	0.827021	Har_00060941	Har_00060941	gi|195135453|ref|XP_002012147.1|GI16593 [Drosophila mojavensis] >gi|193918411|gb|EDW17278.1| GI16593 [Drosophila mojavensis]
0.001055	0.0314483	1	0.538635	0.866805	0.177813	Har_00077744	Har_00077744	gi|37362766|gb|AAQ91341.1|cyclin B [Plodia interpunctella]
0.002158	0.0460275	1	0.419012	0.255867	1.29164	Har_00203947	Har_00203947	na
0.000124	0.0113278	1	0.467594	0.220356	0.803762	Har_00043513	Har_00043513	gi|62241290|dbj|BAD93613.1|protein disulfide-isomerase like protein ERp57 [Bombyx mori]
1.4e-05	0.00462102	1	0.386894	0.504334	0.423546	Har_00025586	Har_00025586	gi|112983462|ref|NP_001037138.1|ribosomal protein L7A [Bombyx mori] >gi|54609203|gb|AAV34817.1| ribosomal protein L7A [Bombyx mori]
0.000384	0.0189156	1	0.4349	0.302066	0.62815	Har_00136467	Har_00136467	na
0.001975	0.0438006	1	0.420831	0.392341	0.499698	Har_00036953	Har_00036953	gi|114052504|ref|NP_001040344.1|proteasome 25 kDa subunit [Bombyx mori] >gi|95102572|gb|ABF51224.1| proteasome 25 kDa subunit [Bombyx mori]
2.5e-05	0.00609181	1	0.446626	0.305764	0.603757	Har_00072176	Har_00072176	gi|2498144|sp|Q25490.1|APLP_MANSERecName: Full=Apolipophorins; Contains: RecName: Full=Apolipophorin-2; AltName: Full=Apolipophorin II; AltName: Full=apoLp-2; Contains: RecName: Full=Apolipophorin-1; AltName: Full=Apolipophorin I; AltName: Full=apoLp
0.00019	0.0135517	1	0.506166	0.411186	0.395813	Har_00073309	Har_00073309	gi|170062088|ref|XP_001866517.1|26S protease regulatory subunit 6A [Culex quinquefasciatus] >gi|167880127|gb|EDS43510.1| 26S protease regulatory subunit 6A [Culex quinquefasciatus]
0.000393	0.0191091	1	0.438695	0.224802	0.835238	Har_00140073	Har_00140073	na
0.002423	0.0484172	1	0.414284	0.384811	0.516579	Har_00118160	Har_00118160	na
0.001483	0.0377172	1	0.577965	0.291826	0.488191	Har_00029690	Har_00029690	gi|114052040|ref|NP_001040211.1|Rab-related protein [Bombyx mori] >gi|87248399|gb|ABD36252.1| Rab-related protein [Bombyx mori]
4.7e-05	0.00737965	1	0.467795	0.262789	0.668917	Har_00096404	Har_00096404	gi|160333484|ref|NP_001103768.1|myosin light polypeptide 9 isoform B [Bombyx mori] >gi|87248543|gb|ABD36324.1| myosin light polypeptide 9 isoform 1 [Bombyx mori]
0.002188	0.0461472	1	0.393297	0.510917	0.405893	Har_00076442	Har_00076442	gi|110763855|ref|XP_001122243.1|PREDICTED: similar to Pancreatic lipase-related protein 2 precursor (Secretory glycoprotein GP-3) [Apis mellifera]
0.000133	0.0117466	1	0.794845	0.166323	1.62263	Har_00089892	Har_00089892	gi|157135697|ref|XP_001663552.1|translocation associated membrane protein [Aedes aegypti] >gi|94468440|gb|ABF18069.1| TRAM family protein transporter [Aedes aegypti] >gi|108881214|gb|EAT45439.1| translocation associated membrane protein [Aedes aegypt
0.000523	0.0223536	1	0.481257	0.271635	0.621383	Har_00114673	Har_00114673	gi|195491923|ref|XP_002093773.1|GE21483 [Drosophila yakuba] >gi|194179874|gb|EDW93485.1| GE21483 [Drosophila yakuba]
0.000207	0.013888	1	0.435641	0.206479	1.11115	Har_00116944	Har_00116944	gi|212509612|gb|EEB12973.1|conserved hypothetical protein [Pediculus humanus corporis]
0.001339	0.0358549	1	0.478407	0.268328	0.630103	Har_00089318	Har_00089318	gi|66506366|ref|XP_397486.2|PREDICTED: similar to CG3164-PB, isoform B [Apis mellifera]
0.000206	0.0138415	1	0.366795	0.267371	1.2155	Har_00099680	Har_00099680	gi|157125161|ref|XP_001654241.1|hypothetical protein AaeL_AAEL010095 [Aedes aegypti] >gi|157125163|ref|XP_001654242.1| hypothetical protein AaeL_AAEL010095 [Aedes aegypti] >gi|157125165|ref|XP_001654243.1| hypothetical protein AaeL_AAEL010095 [Aedes
0.000211	0.0139904	1	0.340013	0.320326	0.739651	Har_00209494	Har_00209494	na
0.000786	0.0269469	1	0.485499	0.177859	1.07426	Har_00055728	Har_00055728	gi|7862150|gb|AAF70499.1|AF255341_13-dehydroecdysone 3alpha-reductase [Spodoptera littoralis]
0.002577	0.0498833	1	0.494823	0.387324	0.419306	Har_00024458	Har_00024458	gi|157103460|ref|XP_001647991.1|hypothetical protein AaeL_AAEL003909 [Aedes aegypti] >gi|108880522|gb|EAT44747.1| conserved hypothetical protein [Aedes aegypti]
0.000598	0.0237395	1	0.501925	0.236382	0.675213	Har_00093475	Har_00093475	gi|114051598|ref|NP_001040416.1|leukotriene A4 hydrolase [Bombyx mori] >gi|95102808|gb|ABF51345.1| leukotriene A4 hydrolase [Bombyx mori]
0.000964	0.0301258	1	0.452259	0.428441	0.413294	Har_00077637	Har_00077637	gi|91088885|ref|XP_972389.1|PREDICTED: similar to Rpt1 CG1341-PA [Tribolium castaneum]
0.000362	0.0184968	1	0.503873	0.363615	0.434414	Har_00202267	Har_00202267	na
4e-06	0.00254761	1	0.384443	0.273234	0.75338	Har_00042476	Har_00042476	gi|193659629|ref|XP_001944260.1|PREDICTED: similar to clathrin light chain [Acyrthosiphon pisum]
0.000871	0.028438	1	0.452967	0.318042	0.547854	Har_00018679	Har_00018679	gi|6671050|gb|AAF23078.1|AF128867_1glutathione S-transferase [Choristoneura fumiferana]
0.001135	0.0327117	1	0.683471	0.188981	1.63723	Har_00066736	Har_00066736	gi|148908742|gb|ABR17478.1|unknown [Picea sitchensis]
0.000104	0.0101574	1	0.386962	0.236298	0.857125	Har_00206149	Har_00206149	na
0.000378	0.0187631	1	0.431386	0.424041	0.425448	Har_00095665	Har_00095665	gi|160333326|ref|NP_001103818.1|thymosin isoform 2 [Bombyx mori] >gi|95103092|gb|ABF51487.1| thymosin isoform 2 [Bombyx mori] >gi|221579752|gb|ACM24356.1| thymosin isoform 2 [Bombyx mori]
0.001495	0.0378733	1	0.56958	0.349682	0.390034	Har_00024281	Har_00024281	gi|220028647|gb|ACL77779.1|heat shock protein 90 [Spodoptera exigua]
0.000499	0.0218863	1	0.452304	0.297251	0.576325	Har_00111125	Har_00111125	gi|114050853|ref|NP_001040410.1|1110059p08rik-like protein [Bombyx mori] >gi|95102786|gb|ABF51334.1| 1110059p08rik-like protein [Bombyx mori]
0.002546	0.0496037	1	0.470283	0.385037	0.42682	Har_00227843	Har_00227843	gi|124514096|ref|XP_001350404.1|hypothetical protein [Plasmodium falciparum 3D7] >gi|23615821|emb|CAD52813.1| hypothetical protein [Plasmodium falciparum 3D7]
2e-05	0.00568805	1	0.483584	0.334788	0.476983	Har_00054170	Har_00054170	gi|4090872|gb|AAD09285.1|putative serpin [Hyphantria cunea] >gi|5163416|gb|AAD40672.1| serpin [Hyphantria cunea]
0.000709	0.0257674	1	0.61845	0.155021	1.24176	Har_00054883	Har_00054883	gi|58376764|ref|XP_308839.2|AGAP006918-PA [Anopheles gambiae str. PEST] >gi|55245924|gb|EAA04092.2| AGAP006918-PA [Anopheles gambiae str. PEST]
0.000284	0.0165481	1	0.407855	0.284072	0.665997	Har_00116483	Har_00116483	gi|114052607|ref|NP_001040485.1|SUMO-1 activating enzyme [Bombyx mori] >gi|95103086|gb|ABF51484.1| SUMO-1 activating enzyme [Bombyx mori]
4.3e-05	0.0072882	1	0.526181	0.187921	0.777406	Har_00096370	Har_00096370	gi|165875409|gb|ABY68561.1|serpin-1 variant e [Mamestra configurata]
1.7e-05	0.00512493	1	0.359371	0.320666	0.6617	Har_00234253	Har_00234253	na
0.001756	0.0416176	1	0.421977	0.341317	0.528705	Har_00010719	Har_00010719	gi|110768438|ref|XP_001122807.1|PREDICTED: similar to Laminin A CG10236-PA, partial [Apis mellifera]
0.00234	0.0477288	1	0.469664	0.282956	0.570908	Har_00186910	Har_00186910	na
5e-06	0.00279136	1	0.480542	0.276274	0.563953	Har_00131687	Har_00131687	na
0.002501	0.0491291	1	0.56816	0.141607	1.08009	-	DarkCorner	na
0.000216	0.014197	1	0.408469	0.261842	0.691351	Har_00064448	Har_00064448	gi|208972529|gb|ACI32825.1|beta-1,3-glucan recognition protein 1 [Helicoverpa armigera]
0.000594	0.023645	1	0.619081	0.126071	0.945212	Har_00030030	Har_00030030	gi|122894084|gb|ABM67688.1|chemosensory protein CSP1 [Spodoptera exigua]
0.002246	0.0467815	1	0.443122	0.434518	0.383027	Har_00187821	Har_00187821	na
0.002475	0.0488865	1	0.534237	0.353517	0.3891	Har_00232417	Har_00232417	na
0.002459	0.0487702	1	0.535962	0.337638	0.405592	Har_00102740	Har_00102740	gi|189239889|ref|XP_969643.2|PREDICTED: similar to GA15301-PA [Tribolium castaneum]
0.000617	0.0240681	1	0.466377	0.368067	0.426486	Har_00110648	Har_00110648	gi|210148640|gb|ACJ09226.1|proteasome subunit beta 5 [Helicoverpa armigera]
0.000441	0.0205165	1	0.503071	0.255131	0.570044	Har_00212991	Har_00212991	na
0.001925	0.0433508	1	0.532373	0.333997	0.410372	Har_00020814	Har_00020814	gi|223671398|tpd|FAA00651.1|TPA: putative cuticle protein [Bombyx mori]
0.000102	0.0101574	1	0.474405	0.20668	0.733638	Har_00015602	Har_00015602	gi|18479021|gb|AAL73387.1|AF409102_13-dehydrecdysone 3b-reductase [Trichoplusia ni]
0.000133	0.0117466	1	0.468025	0.230141	0.667393	Har_00238229	Har_00238229	na
0.001167	0.0333155	1	0.273909	3.39746	0.0769354	Har_00204152	Har_00204152	na
0.000942	0.0299348	1	0.651269	0.173258	1.58305	Har_00089893	Har_00089893	gi|157135697|ref|XP_001663552.1|translocation associated membrane protein [Aedes aegypti] >gi|94468440|gb|ABF18069.1| TRAM family protein transporter [Aedes aegypti] >gi|108881214|gb|EAT45439.1| translocation associated membrane protein [Aedes aegypt
3.4e-05	0.00676368	1	0.377411	0.1979	0.953702	Har_00083637	Har_00083637	gi|112983082|ref|NP_001037668.1|cytosolic juvenile hormone binding protein 36 kDa subunit [Bombyx mori] >gi|6625562|gb|AAF19266.1|AF098303_1 cytosolic juvenile hormone binding protein 36 kDa subunit [Bombyx mori]
0.00219	0.0461472	1	0.382991	0.41842	0.444166	Har_00073237	Har_00073237	gi|149240205|ref|XP_001525978.1|hypothetical protein LELG_02537 [Lodderomyces elongisporus NRRL YB-4239] >gi|146450101|gb|EDK44357.1| hypothetical protein LELG_02537 [Lodderomyces elongisporus NRRL YB-4239]
0.001669	0.0404294	1	0.527931	0.243517	0.552722	Har_00047449	Har_00047449	gi|112984330|ref|NP_001037476.1|p260 [Bombyx mori] >gi|2058458|gb|AAB53257.1| p260 [Bombyx mori]
0.002568	0.0498177	1	0.468609	0.304167	0.497352	Har_00044640	Har_00044640	gi|156968401|gb|ABU98654.1|prophenoloxidase activating enzyme [Helicoverpa armigera]
3.5e-05	0.00676368	1	0.385791	0.326429	0.561267	Har_00108613	Har_00108613	gi|114051245|ref|NP_001040387.1|proteasome alpha 3 subunit [Bombyx mori] >gi|95102712|gb|ABF51297.1| proteasome alpha 3 subunit [Bombyx mori]
6e-05	0.00814775	1	0.423902	0.233514	0.712948	Har_00222109	Har_00222109	na
0.000455	0.020741	1	0.288814	0.290309	0.838679	Har_00038077	Har_00038077	gi|156616773|gb|ABU87405.1|chemosensory-like protein [Trichoplusia ni]
2.2e-05	0.00595713	1	0.432778	0.285804	0.565015	Har_00107093	Har_00107093	gi|148907235|gb|ABR16757.1|unknown [Picea sitchensis]
9.4e-05	0.00994421	1	0.471719	0.187621	0.789204	Har_00077695	Har_00077695	gi|112983392|ref|NP_001036991.1|HSP90 cochaperone CDC37 homologue [Bombyx mori] >gi|60592745|dbj|BAD90847.1| HSP90 cochaperone CDC37 homologue [Bombyx mori]
0.001954	0.0436345	1	0.350549	0.285713	0.696787	Har_00072504	Har_00072504	gi|114052607|ref|NP_001040485.1|SUMO-1 activating enzyme [Bombyx mori] >gi|95103086|gb|ABF51484.1| SUMO-1 activating enzyme [Bombyx mori]
3.9e-05	0.00708265	1	0.476534	0.280299	0.51731	Har_00001404	Har_00001404	gi|211939905|gb|ACJ13433.1|proteasome subunit beta 1 [Helicoverpa armigera]
0.000161	0.0126837	1	0.718743	0.164952	1.72211	Har_00082354	Har_00082354	gi|148908742|gb|ABR17478.1|unknown [Picea sitchensis]
0.001953	0.0436337	1	0.595895	0.116394	0.991717	Har_00018776	Har_00018776	gi|122894084|gb|ABM67688.1|chemosensory protein CSP1 [Spodoptera exigua]
0.001461	0.0375295	1	0.475063	0.430236	0.334375	Har_00082427	Har_00082427	gi|156554415|ref|XP_001603570.1|PREDICTED: similar to ornithine aminotransferase [Nasonia vitripennis]
0.000336	0.0178123	1	0.338392	0.283773	0.710848	Har_00217320	Har_00217320	na
0.001487	0.0377553	1	0.347981	0.444634	0.440786	Har_00207627	Har_00207627	na
5.8e-05	0.00804528	1	0.384221	0.304337	0.579014	Har_00020009	Har_00020009	gi|2498144|sp|Q25490.1|APLP_MANSERecName: Full=Apolipophorins; Contains: RecName: Full=Apolipophorin-2; AltName: Full=Apolipophorin II; AltName: Full=apoLp-2; Contains: RecName: Full=Apolipophorin-1; AltName: Full=Apolipophorin I; AltName: Full=apoLp
2.1e-05	0.00582589	1	0.279836	0.266274	1.10106	Har_00070732	Har_00070732	gi|114051397|ref|NP_001040370.1|small nuclear ribonucleoprotein E [Bombyx mori] >gi|95102658|gb|ABF51267.1| small nuclear ribonucleoprotein E [Bombyx mori]
0.000713	0.0258348	1	0.416636	0.177904	1.09739	Har_00058441	Har_00058441	gi|56462174|gb|AAV91370.1|hypothetical protein 2 [Lonomia obliqua]
2.4e-05	0.00609181	1	0.613783	0.141689	0.775495	Har_00055521	Har_00055521	gi|122894084|gb|ABM67688.1|chemosensory protein CSP1 [Spodoptera exigua]
0.00075	0.0263666	1	0.448589	0.283538	0.52961	Har_00016605	Har_00016605	gi|211939903|gb|ACJ13432.1|proteasome subunit beta 7 [Helicoverpa armigera]
6.7e-05	0.00853448	1	0.590521	0.16565	1.45323	Har_00029099	Har_00029099	gi|56418417|gb|AAV91016.1|hemolymph proteinase 18 [Manduca sexta]
2.4e-05	0.00609181	1	0.472759	0.251108	0.566546	Har_00049058	Har_00049058	gi|195492539|ref|XP_002094035.1|GE20417 [Drosophila yakuba] >gi|194180136|gb|EDW93747.1| GE20417 [Drosophila yakuba]
0.001024	0.0310357	1	0.433377	0.244036	0.635094	Har_00007079	Har_00007079	gi|114051135|ref|NP_001040311.1|BWK-1-like protein [Bombyx mori] >gi|87248279|gb|ABD36192.1| BWK-1-like protein [Bombyx mori]
0.002091	0.0453937	1	0.246905	0.376583	0.720251	Har_00112926	Har_00112926	gi|47211956|emb|CAF90092.1|unnamed protein product [Tetraodon nigroviridis]
0.00171	0.0410001	1	0.548582	1.68643	0.20559	Har_00126654	Har_00126654	na
4e-06	0.00254761	1	0.413849	0.208578	1.29557	Har_00225528	Har_00225528	na
0.000509	0.0220469	1	0.371211	0.239368	0.749286	Har_00074798	Har_00074798	gi|91091364|ref|XP_972648.1|PREDICTED: similar to adaptin ear-binding coat-associated protein 2 [Tribolium castaneum]
0.00028	0.0164865	1	0.350455	0.381518	0.497622	Har_00223517	Har_00223517	na
0.000731	0.0260898	1	0.359507	0.223882	0.826641	Har_00190893	Har_00190893	na
0.000251	0.0154846	1	0.369283	0.284377	0.630525	Har_00232995	Har_00232995	na
0.001761	0.0416924	1	0.324073	0.251011	0.804847	Har_00094071	Har_00094071	gi|117970179|dbj|BAF36819.1|pxPhosphoserine phosphatase [Plutella xylostella]
0.000169	0.0129309	1	0.447544	0.338713	0.431837	Har_00090329	Har_00090329	gi|48097764|ref|XP_391945.1|PREDICTED: similar to Proteasome p44.5 subunit CG10149-PB, isoform B isoform 1 [Apis mellifera]
0.001228	0.0341724	1	0.542873	0.239736	0.502016	Har_00203354	Har_00203354	na
0.001018	0.0309784	1	0.422638	0.341506	0.452058	Har_00052161	Har_00052161	gi|114052633|ref|NP_001040263.1|26S proteasome non-ATPase regulatory subunit 14 [Bombyx mori] >gi|87248555|gb|ABD36330.1| 26S proteasome non-ATPase regulatory subunit 14 [Bombyx mori]
0.000376	0.0187461	1	0.327285	0.358938	0.552753	Har_00056388	Har_00056388	gi|170044249|ref|XP_001849766.1|pantetheinase [Culex quinquefasciatus] >gi|167867477|gb|EDS30860.1| pantetheinase [Culex quinquefasciatus]
0.001895	0.0431263	1	0.347907	0.450536	0.413539	Har_00048863	Har_00048863	gi|158299774|ref|XP_319805.4|AGAP009053-PA [Anopheles gambiae str. PEST] >gi|157013679|gb|EAA15026.4| AGAP009053-PA [Anopheles gambiae str. PEST]
0.000779	0.0268289	1	0.496612	0.225661	0.578381	Har_00043386	Har_00043386	gi|114051598|ref|NP_001040416.1|leukotriene A4 hydrolase [Bombyx mori] >gi|95102808|gb|ABF51345.1| leukotriene A4 hydrolase [Bombyx mori]
0.00015	0.0124459	1	0.333798	0.203104	1.04612	Har_00059543	Har_00059543	gi|117970179|dbj|BAF36819.1|pxPhosphoserine phosphatase [Plutella xylostella]
0.000204	0.0138415	1	0.439831	0.414088	0.355542	Har_00056680	Har_00056680	gi|91082883|ref|XP_971686.1|PREDICTED: similar to 26S proteasome regulatory subunit S3 [Tribolium castaneum]
6.7e-05	0.00853448	1	0.421281	0.263439	0.582808	Har_00090738	Har_00090738	gi|62241290|dbj|BAD93613.1|protein disulfide-isomerase like protein ERp57 [Bombyx mori]
5.3e-05	0.0077063	1	0.419746	0.327456	0.470149	Har_00052160	Har_00052160	gi|114052633|ref|NP_001040263.1|26S proteasome non-ATPase regulatory subunit 14 [Bombyx mori] >gi|87248555|gb|ABD36330.1| 26S proteasome non-ATPase regulatory subunit 14 [Bombyx mori]
7.6e-05	0.00906786	1	0.27083	0.284978	0.836832	Har_00048084	Har_00048084	gi|156616773|gb|ABU87405.1|chemosensory-like protein [Trichoplusia ni]
0.000707	0.0257619	1	0.441285	0.310659	0.46826	Har_00021249	Har_00021249	gi|170029054|ref|XP_001842409.1|conserved hypothetical protein [Culex quinquefasciatus] >gi|167879459|gb|EDS42842.1| conserved hypothetical protein [Culex quinquefasciatus]
0.002125	0.0457583	1	0.535044	0.291616	0.410382	Har_00143743	Har_00143743	na
0.000944	0.0299773	1	0.401714	0.236301	0.674523	Har_00185611	Har_00185611	na
0.001853	0.0428874	1	0.495255	0.196058	0.656458	Har_00085949	Har_00085949	gi|195119454|ref|XP_002004246.1|GI19716 [Drosophila mojavensis] >gi|193909314|gb|EDW08181.1| GI19716 [Drosophila mojavensis]
0.000769	0.0266878	1	0.452563	0.334347	0.41877	Har_00083083	Har_00083083	gi|51262008|gb|AAH80137.1|26S protease regulatory subunit 7 [Xenopus tropicalis]
0.000927	0.0296038	1	0.350214	0.395392	0.45727	Har_00210365	Har_00210365	na
5e-06	0.00279136	1	0.493996	0.33091	0.386862	Har_00091212	Har_00091212	gi|158291890|ref|XP_313417.4|AGAP003649-PA [Anopheles gambiae str. PEST] >gi|157017505|gb|EAA08835.4| AGAP003649-PA [Anopheles gambiae str. PEST]
0.000719	0.0258811	1	0.517777	0.249781	0.488098	Har_00075409	Har_00075409	gi|66526670|ref|XP_624161.1|PREDICTED: similar to uninitiated CG4008-PA [Apis mellifera]
0.000124	0.0113278	1	0.43331	0.24605	0.591438	Har_00051304	Har_00051304	gi|114050993|ref|NP_001040146.1|proteasome zeta subunit [Bombyx mori] >gi|87248207|gb|ABD36156.1| proteasome zeta subunit [Bombyx mori]
0.00024	0.0150943	1	0.47554	0.244148	0.54175	Har_00028663	Har_00028663	gi|212517628|gb|EEB19493.1|uv excision repair protein rad23, putative [Pediculus humanus corporis]
0.00157	0.0391375	1	0.429599	0.239275	0.608592	Har_00017057	Har_00017057	gi|157117627|ref|XP_001658858.1|thrombospondin [Aedes aegypti] >gi|108875947|gb|EAT40172.1| thrombospondin [Aedes aegypti]
1.5e-05	0.00474336	1	0.23284	0.344642	0.778695	Har_00032977	Har_00032977	gi|91086423|ref|XP_967525.1|PREDICTED: similar to sugar transporter [Tribolium castaneum]
0.000673	0.0251721	1	0.436541	0.364702	0.390907	Har_00098610	Har_00098610	gi|208972533|gb|ACI32827.1|beta-1,3-glucan recognition protein 2b [Helicoverpa armigera]
0.000889	0.0287558	1	0.39052	0.177253	1.11988	Har_00200919	Har_00200919	na
0.001196	0.0338019	1	0.432554	0.355078	0.401577	Har_00099744	Har_00099744	gi|91079058|ref|XP_975148.1|PREDICTED: similar to Ubiquitin domain-containing protein UBFD1 [Tribolium castaneum]
0.00013	0.011572	1	0.394094	0.302552	0.517286	Har_00163354	Har_00163354	na
0.001083	0.0318836	1	0.391863	0.383718	0.410084	Har_00092804	Har_00092804	gi|112984548|ref|NP_001037205.1|serpin-5 [Bombyx mori] >gi|45594230|gb|AAS68506.1| serpin-5 [Bombyx mori]
0.001338	0.0358549	1	0.451521	0.212674	0.640837	Har_00014703	Har_00014703	na
1.1e-05	0.0042881	1	0.41347	0.313294	0.473611	Har_00026925	Har_00026925	gi|114052504|ref|NP_001040344.1|proteasome 25 kDa subunit [Bombyx mori] >gi|95102572|gb|ABF51224.1| proteasome 25 kDa subunit [Bombyx mori]
0.000274	0.0163245	1	0.437645	0.354989	0.394746	Har_00037895	Har_00037895	gi|212507839|gb|EEB11701.1|26S proteasome non-ATPase regulatory subunit, putative [Pediculus humanus corporis]
0.000664	0.0250217	1	0.442466	0.351606	0.393534	Har_00097030	Har_00097030	gi|114052633|ref|NP_001040263.1|26S proteasome non-ATPase regulatory subunit 14 [Bombyx mori] >gi|87248555|gb|ABD36330.1| 26S proteasome non-ATPase regulatory subunit 14 [Bombyx mori]
0.001753	0.0415683	1	0.9075	0.0714055	1.05883	Har_00219096	Har_00219096	na
0.000491	0.0216615	1	0.457613	0.331425	0.402611	Har_00073957	Har_00073957	gi|3869218|dbj|BAA34401.1|MBF2 [Bombyx mandarina]
1.9e-05	0.00550756	1	0.461573	0.295936	0.443638	Har_00025426	Har_00025426	gi|114052504|ref|NP_001040344.1|proteasome 25 kDa subunit [Bombyx mori] >gi|95102572|gb|ABF51224.1| proteasome 25 kDa subunit [Bombyx mori]
0.001304	0.0355436	1	0.533413	0.174159	0.644659	Har_00073576	Har_00073576	gi|149240245|ref|XP_001525998.1|hypothetical protein LELG_02556 [Lodderomyces elongisporus NRRL YB-4239] >gi|146450121|gb|EDK44377.1| hypothetical protein LELG_02556 [Lodderomyces elongisporus NRRL YB-4239]
0.000185	0.0134066	1	0.472895	0.264548	0.472207	Har_00075165	Har_00075165	gi|114052040|ref|NP_001040211.1|Rab-related protein [Bombyx mori] >gi|87248399|gb|ABD36252.1| Rab-related protein [Bombyx mori]
0.000366	0.0185752	1	0.392121	0.29873	0.504222	Har_00074185	Har_00074185	gi|114052504|ref|NP_001040344.1|proteasome 25 kDa subunit [Bombyx mori] >gi|95102572|gb|ABF51224.1| proteasome 25 kDa subunit [Bombyx mori]
0.00042	0.0200131	1	0.451918	0.24826	0.526254	Har_00079220	Har_00079220	gi|40882415|gb|AAR96119.1|SD22390p [Drosophila melanogaster]
2.6e-05	0.00609181	1	0.350991	0.251484	0.66788	Har_00115527	Har_00115527	gi|208972529|gb|ACI32825.1|beta-1,3-glucan recognition protein 1 [Helicoverpa armigera]
0.001206	0.0339361	1	0.35089	0.264992	1.58329	Har_00047658	Har_00047658	gi|54310836|gb|AAV33654.1|chymotrypsinogen [Helicoverpa punctigera]
0.000946	0.0299777	1	0.377815	0.271816	0.569536	Har_00101017	Har_00101017	gi|195122946|ref|XP_002005971.1|GI18805 [Drosophila mojavensis] >gi|193911039|gb|EDW09906.1| GI18805 [Drosophila mojavensis]
0.000812	0.0272798	1	0.412947	0.315821	0.447871	Har_00039752	Har_00039752	gi|170062088|ref|XP_001866517.1|26S protease regulatory subunit 6A [Culex quinquefasciatus] >gi|167880127|gb|EDS43510.1| 26S protease regulatory subunit 6A [Culex quinquefasciatus]
0.000157	0.0126102	1	0.418653	0.371925	0.374446	Har_00044545	Har_00044545	gi|114052086|ref|NP_001040208.1|proteasome 26S non-ATPase subunit 12 [Bombyx mori] >gi|87248393|gb|ABD36249.1| proteasome 26S non-ATPase subunit 12 [Bombyx mori]
0.001647	0.0401495	1	0.377012	0.317366	0.486581	Har_00103993	Har_00103993	gi|112984192|ref|NP_001037440.1|pyridoxal kinase [Bombyx mori] >gi|91265776|gb|ABE28378.1| pyridoxal kinase [Bombyx mori]
0.001605	0.039623	1	0.33758	0.280361	0.61486	Har_00069284	Har_00069284	gi|91091098|ref|XP_968555.1|PREDICTED: similar to AGAP002051-PA [Tribolium castaneum]
0.000128	0.0115302	1	0.34586	0.42113	0.398968	Har_00055945	Har_00055945	gi|50344918|ref|NP_001002131.1|hypothetical protein LOC415221 [Danio rerio] >gi|47937964|gb|AAH71432.1| Zgc:86762 [Danio rerio] >gi|122891281|emb|CAM13018.1| novel protein (zgc:86762) [Danio rerio]
7.7e-05	0.00909062	1	0.342528	0.350392	0.482071	Har_00061745	Har_00061745	na
0.002209	0.0463301	1	0.248754	0.559857	0.415356	Har_00016259	Har_00016259	gi|223671042|tpd|FAA00472.1|TPA: putative cuticle protein [Bombyx mori]
0.000861	0.0282338	1	0.417252	0.303949	0.455491	Har_00065976	Har_00065976	gi|193606207|ref|XP_001947883.1|PREDICTED: similar to ariadne ubiquitin-conjugating enzyme E2 binding protein [Acyrthosiphon pisum]
0.000361	0.0184968	1	0.410715	0.970608	0.143915	Har_00004774	Har_00004774	na
4.5e-05	0.00734621	1	0.363026	0.17811	1.13055	Har_00059763	Har_00059763	gi|94471815|gb|ABF21123.1|transferrin [Spodoptera litura]
0.000114	0.0108987	1	0.536734	0.120312	0.882978	Har_00116122	Har_00116122	gi|28950687|gb|AAO38861.1|mitochondrial transcription termination factor [Drosophila melanogaster]
0.001746	0.0414893	1	0.601051	0.124373	0.762421	Har_00186599	Har_00186599	na
0.00252	0.0493469	1	0.341458	0.449368	0.371187	Har_00094159	Har_00094159	gi|56462138|gb|AAV91352.1|hypothetical protein 1 [Lonomia obliqua]
0.000192	0.013566	1	0.38175	0.294398	0.505709	Har_00039163	Har_00039163	gi|114051245|ref|NP_001040387.1|proteasome alpha 3 subunit [Bombyx mori] >gi|95102712|gb|ABF51297.1| proteasome alpha 3 subunit [Bombyx mori]
0.000159	0.0126269	1	0.397162	0.3863	0.369755	Har_00029305	Har_00029305	gi|170039197|ref|XP_001847430.1|beat protein [Culex quinquefasciatus] >gi|167862800|gb|EDS26183.1| beat protein [Culex quinquefasciatus]
0.000144	0.0121875	1	0.376079	0.178909	1.18884	Har_00225529	Har_00225529	na
0.000322	0.0174381	1	0.637037	0.118103	0.751201	Har_00055522	Har_00055522	gi|122894084|gb|ABM67688.1|chemosensory protein CSP1 [Spodoptera exigua]
9.5e-05	0.00994421	1	0.386645	0.315504	0.463188	Har_00107097	Har_00107097	gi|148907235|gb|ABR16757.1|unknown [Picea sitchensis]
0.000268	0.0161115	1	0.374545	0.238952	0.629715	Har_00064449	Har_00064449	gi|208972529|gb|ACI32825.1|beta-1,3-glucan recognition protein 1 [Helicoverpa armigera]
0.000101	0.0101269	1	0.43362	0.236676	0.546894	Har_00039998	Har_00039998	gi|156538623|ref|XP_001608180.1|PREDICTED: similar to short-chain dehydrogenase [Nasonia vitripennis]
0.00052	0.0222885	1	0.427087	0.323363	0.405897	Har_00082656	Har_00082656	gi|183979247|dbj|BAG30785.1|similar to CG9701-PA [Papilio xuthus]
0.000952	0.0300415	1	0.416757	0.290976	0.461147	Har_00056679	Har_00056679	gi|91082883|ref|XP_971686.1|PREDICTED: similar to 26S proteasome regulatory subunit S3 [Tribolium castaneum]
0.000599	0.0237395	1	0.453128	0.425735	0.288672	Har_00017627	Har_00017627	gi|157109474|ref|XP_001650687.1|ornithine aminotransferase [Aedes aegypti] >gi|108879017|gb|EAT43242.1| ornithine aminotransferase [Aedes aegypti]
0.000997	0.0307743	1	0.480192	0.15287	0.754977	Har_00211393	Har_00211393	na
0.000699	0.0256357	1	0.334587	0.288024	0.574771	Har_00057738	Har_00057738	na
0.000334	0.0177897	1	0.410809	0.22128	0.609057	Har_00055834	Har_00055834	na
0.00051	0.0220691	1	0.303995	0.210902	1.15852	Har_00099675	Har_00099675	gi|157125161|ref|XP_001654241.1|hypothetical protein AaeL_AAEL010095 [Aedes aegypti] >gi|157125163|ref|XP_001654242.1| hypothetical protein AaeL_AAEL010095 [Aedes aegypti] >gi|157125165|ref|XP_001654243.1| hypothetical protein AaeL_AAEL010095 [Aedes
0.001267	0.0347867	1	0.342898	0.334501	0.482319	Har_00103723	Har_00103723	gi|189240901|ref|XP_966398.2|PREDICTED: similar to potassium channel tetramerisation domain containing 9 [Tribolium castaneum]
0.001345	0.0359249	1	0.353098	0.338789	0.462447	Har_00014508	Har_00014508	na
0.000373	0.0186789	1	0.344842	0.26469	0.60312	Har_00075826	Har_00075826	gi|156538623|ref|XP_001608180.1|PREDICTED: similar to short-chain dehydrogenase [Nasonia vitripennis]
0.002336	0.0477095	1	0.378339	0.199187	0.729304	Har_00049744	Har_00049744	gi|150417961|sp|Q3KQD1.2|SLU7_XENLARecName: Full=Pre-mRNA-splicing factor SLU7
0.001866	0.0429464	1	0.300192	0.383534	0.477211	Har_00082683	Har_00082683	gi|170060741|ref|XP_001865935.1|conserved hypothetical protein [Culex quinquefasciatus] >gi|167879116|gb|EDS42499.1| conserved hypothetical protein [Culex quinquefasciatus]
7.9e-05	0.00915995	1	0.413844	0.210662	0.628123	Har_00051294	Har_00051294	gi|114050993|ref|NP_001040146.1|proteasome zeta subunit [Bombyx mori] >gi|87248207|gb|ABD36156.1| proteasome zeta subunit [Bombyx mori]
0.002469	0.0488384	1	0.452165	0.437532	0.276636	Har_00092903	Har_00092903	gi|157109474|ref|XP_001650687.1|ornithine aminotransferase [Aedes aegypti] >gi|108879017|gb|EAT43242.1| ornithine aminotransferase [Aedes aegypti]
0.001896	0.0431273	1	0.255968	0.323178	0.659306	Har_00037204	Har_00037204	gi|148298740|ref|NP_001091783.1|bmp0909-12 [Bombyx mori] >gi|112214586|gb|ABI14022.1| bmp0909-12 [Bombyx mori]
0.000544	0.0227136	1	0.434186	0.198086	0.62908	Har_00233375	Har_00233375	na
0.000181	0.0133172	1	0.399462	0.338395	0.399841	Har_00077638	Har_00077638	gi|91088885|ref|XP_972389.1|PREDICTED: similar to Rpt1 CG1341-PA [Tribolium castaneum]
0.00133	0.0357566	1	0.352318	0.451701	0.339304	Har_00075606	Har_00075606	gi|9624379|gb|AAF90147.1|AF274021_1tetraspanin D107 [Manduca sexta]
0.000602	0.0238167	1	0.443706	0.257565	0.472134	Har_00232573	Har_00232573	na
0.000214	0.014086	1	0.421309	0.332443	0.384923	Har_00091203	Har_00091203	gi|91082883|ref|XP_971686.1|PREDICTED: similar to 26S proteasome regulatory subunit S3 [Tribolium castaneum]
0.000153	0.0125566	1	0.330809	0.227956	1.39928	Har_00112056	Har_00112056	gi|157132466|ref|XP_001662576.1|sodium-bile acid cotransporter [Aedes aegypti] >gi|108871160|gb|EAT35385.1| sodium-bile acid cotransporter [Aedes aegypti]
0.000269	0.0161115	1	0.361344	0.22526	0.659317	Har_00055817	Har_00055817	gi|91087215|ref|XP_975476.1|PREDICTED: similar to clathrin coat assembly protein ap17 [Tribolium castaneum]
0.000151	0.0124603	1	0.356872	0.294608	0.508282	Har_00010694	Har_00010694	gi|156544088|ref|XP_001603578.1|PREDICTED: similar to Prolyl endopeptidase [Nasonia vitripennis]
0.000576	0.0233785	1	0.35484	0.444563	0.337388	Har_00075607	Har_00075607	gi|9624379|gb|AAF90147.1|AF274021_1tetraspanin D107 [Manduca sexta]
6.9e-05	0.00861928	1	0.274927	0.31132	0.61921	Har_00200878	Har_00200878	na
0.001985	0.0439362	1	0.394153	0.22804	0.589493	Har_00028665	Har_00028665	gi|212517628|gb|EEB19493.1|uv excision repair protein rad23, putative [Pediculus humanus corporis]
0.002421	0.0484172	1	0.395187	0.17527	1.31291	Har_00091156	Har_00091156	gi|158292117|ref|XP_562137.3|AGAP004391-PA [Anopheles gambiae str. PEST] >gi|157017282|gb|EAL40529.3| AGAP004391-PA [Anopheles gambiae str. PEST]
0.00011	0.0106742	1	0.348024	0.20849	0.723949	Har_00115528	Har_00115528	gi|208972529|gb|ACI32825.1|beta-1,3-glucan recognition protein 1 [Helicoverpa armigera]
6.9e-05	0.00861928	1	0.467789	0.162284	0.691035	Har_00030403	Har_00030403	gi|112982896|ref|NP_001037576.1|small GTP binding protein RAB8 [Bombyx mori] >gi|95102574|gb|ABF51225.1| small GTP binding protein RAB8 [Bombyx mori] >gi|102993217|gb|ABF71468.1| ras-related GTP-binding protein Rab8 [Bombyx mori]
0.000893	0.0288261	1	0.4058	0.334514	0.385376	Har_00052897	Har_00052897	gi|7537454|gb|AAF35867.2|cathepsin B-like cysteine proteinase [Helicoverpa armigera]
0.000261	0.0158422	1	0.26616	0.269127	0.728787	Har_00075205	Har_00075205	gi|114051842|ref|NP_001040431.1|cyclic AMP-regulated protein [Bombyx mori] >gi|95102866|gb|ABF51374.1| cyclic AMP-regulated protein [Bombyx mori]
0.000895	0.0288261	1	0.446806	0.196122	0.595581	Har_00003008	Har_00003008	gi|47027892|gb|AAT08969.1|cytochrome P450 [Helicoverpa armigera]
0.001654	0.0402118	1	0.459361	0.303355	0.373107	Har_00027427	Har_00027427	gi|124487678|gb|ABN11927.1|putative proteasome 26S subunit, non-ATPase, 2 [Maconellicoccus hirsutus]
0.000312	0.0171221	1	0.41091	0.205191	0.616011	Har_00086657	Har_00086657	gi|114050993|ref|NP_001040146.1|proteasome zeta subunit [Bombyx mori] >gi|87248207|gb|ABD36156.1| proteasome zeta subunit [Bombyx mori]
0.000276	0.0163952	1	0.390754	0.297466	0.44359	Har_00197358	Har_00197358	na
3.9e-05	0.00708265	1	0.31882	0.167754	1.04197	Har_00082011	Har_00082011	gi|94471815|gb|ABF21123.1|transferrin [Spodoptera litura]
5e-05	0.00751163	1	0.451595	0.162526	0.699189	Har_00051242	Har_00051242	gi|66522015|ref|XP_393883.2|PREDICTED: similar to REG CG1591-PA [Apis mellifera]
0.001595	0.0394994	1	0.378259	0.176945	1.30454	Har_00113500	Har_00113500	gi|91087351|ref|XP_975614.1|PREDICTED: similar to CG15771 CG15771-PA [Tribolium castaneum]
0.001329	0.0357566	1	0.412823	0.142135	0.873264	Har_00057134	Har_00057134	gi|106897087|gb|ABF83203.1|C-type lectin [Helicoverpa armigera]
0.001589	0.0394589	1	0.36066	0.175382	0.808635	Har_00062042	Har_00062042	gi|116789445|gb|ABK25249.1|unknown [Picea sitchensis]
0.000157	0.0126102	1	0.385668	0.240579	0.55014	Har_00017737	Har_00017737	gi|148907235|gb|ABR16757.1|unknown [Picea sitchensis]
0.000509	0.0220469	1	0.837128	0.0636498	0.951846	Har_00171636	Har_00171636	na
0.001669	0.0404294	1	0.389177	0.380822	0.341382	Har_00032511	Har_00032511	gi|18140733|gb|AAL60414.1|AF393489_1twelve cysteine protein 1 [Manduca sexta]
0.000164	0.0127424	1	0.385176	0.332796	0.392018	Har_00056463	Har_00056463	gi|2960216|emb|CAA11285.1|26S proteasome regulatory ATPase subunit 10b (S10b) [Manduca sexta]
0.00147	0.0375981	1	0.398404	0.268945	0.464985	Har_00212794	Har_00212794	na
0.000604	0.023854	1	0.429197	0.294116	0.394542	Har_00101007	Har_00101007	gi|114052713|ref|NP_001040543.1|proteasome 26S non-ATPase subunit 7 [Bombyx mori] >gi|95103074|gb|ABF51478.1| proteasome 26S non-ATPase subunit 7 [Bombyx mori]
0.001702	0.0409168	1	0.363525	0.211286	0.643126	Har_00098209	Har_00098209	gi|112983062|ref|NP_001037056.1|lipopolysaccharide binding protein [Bombyx mori] >gi|4469126|emb|CAB38429.1| lipopolysaccharide binding protein [Bombyx mori]
0.000505	0.0219789	1	0.399012	0.223241	0.553484	Har_00095945	Har_00095945	gi|157783840|gb|ABV72691.1|nicotinic acetylcholine receptor alpha 9 subunit [Bombyx mori]
0.000197	0.0137051	1	0.417746	0.300928	0.391963	Har_00184395	Har_00184395	na
0.000141	0.0121385	1	0.578396	0.118768	0.712741	Har_00030127	Har_00030127	gi|122894084|gb|ABM67688.1|chemosensory protein CSP1 [Spodoptera exigua]
0.000288	0.0165481	1	0.404424	0.234488	0.515048	Har_00043388	Har_00043388	gi|114052504|ref|NP_001040344.1|proteasome 25 kDa subunit [Bombyx mori] >gi|95102572|gb|ABF51224.1| proteasome 25 kDa subunit [Bombyx mori]
2e-06	0.00210326	1	0.433228	0.25393	0.441575	Har_00036955	Har_00036955	gi|114052504|ref|NP_001040344.1|proteasome 25 kDa subunit [Bombyx mori] >gi|95102572|gb|ABF51224.1| proteasome 25 kDa subunit [Bombyx mori]
0.00024	0.0150943	1	0.418741	0.303328	0.382009	Har_00084823	Har_00084823	gi|114052086|ref|NP_001040208.1|proteasome 26S non-ATPase subunit 12 [Bombyx mori] >gi|87248393|gb|ABD36249.1| proteasome 26S non-ATPase subunit 12 [Bombyx mori]
0.001032	0.0311188	1	0.388994	0.286489	0.434615	Har_00045961	Har_00045961	na
4.6e-05	0.00737965	1	0.387065	0.316013	0.395208	Har_00114956	Har_00114956	gi|114052713|ref|NP_001040543.1|proteasome 26S non-ATPase subunit 7 [Bombyx mori] >gi|95103074|gb|ABF51478.1| proteasome 26S non-ATPase subunit 7 [Bombyx mori]
0.001533	0.0385124	1	0.456178	0.237952	0.442884	Har_00055655	Har_00055655	gi|157111247|ref|XP_001651451.1|BRI1-KD interacting protein, putative [Aedes aegypti] >gi|157132031|ref|XP_001662415.1| charged multivesicular body protein 5 [Aedes aegypti] >gi|94469372|gb|ABF18535.1| vacuolar sorting protein [Aedes aegypti] >gi|108
0.000116	0.0109969	1	0.411273	0.287654	0.403841	Har_00098756	Har_00098756	gi|114052713|ref|NP_001040543.1|proteasome 26S non-ATPase subunit 7 [Bombyx mori] >gi|95103074|gb|ABF51478.1| proteasome 26S non-ATPase subunit 7 [Bombyx mori]
0.000381	0.0188088	1	0.342404	0.307743	0.452055	Har_00055946	Har_00055946	gi|50344918|ref|NP_001002131.1|hypothetical protein LOC415221 [Danio rerio] >gi|47937964|gb|AAH71432.1| Zgc:86762 [Danio rerio] >gi|122891281|emb|CAM13018.1| novel protein (zgc:86762) [Danio rerio]
0.000743	0.0262693	1	0.359173	0.389001	0.338294	Har_00072747	Har_00072747	gi|56418417|gb|AAV91016.1|hemolymph proteinase 18 [Manduca sexta]
0.001613	0.0397276	1	0.581016	0.0986436	1.2198	-	DarkCorner	na
3.4e-05	0.00676368	1	0.675524	0.085384	0.812438	Har_00098911	Har_00098911	gi|157137510|ref|XP_001657081.1|stearoyl-coa desaturase [Aedes aegypti] >gi|108880849|gb|EAT45074.1| stearoyl-coa desaturase [Aedes aegypti]
0.00095	0.0299993	1	0.406746	0.220721	0.520446	Har_00064261	Har_00064261	gi|114052160|ref|NP_001040459.1|proteasome subunit alpha type 6-A [Bombyx mori] >gi|95102978|gb|ABF51430.1| proteasome subunit alpha type 6-A [Bombyx mori]
3.2e-05	0.00673042	1	0.37515	0.210838	0.58524	Har_00046809	Har_00046809	gi|219881450|gb|ACL51928.1|lysozyme precursor [Helicoverpa zea]
1e-06	0.00155931	1	0.346237	0.187057	0.714428	Har_00027773	Har_00027773	gi|157112314|ref|XP_001657491.1|clathrin light chain [Aedes aegypti] >gi|108883764|gb|EAT47989.1| clathrin light chain [Aedes aegypti]
1e-06	0.00155931	1	0.315717	0.146857	0.997134	Har_00049559	Har_00049559	gi|112983082|ref|NP_001037668.1|cytosolic juvenile hormone binding protein 36 kDa subunit [Bombyx mori] >gi|6625562|gb|AAF19266.1|AF098303_1 cytosolic juvenile hormone binding protein 36 kDa subunit [Bombyx mori]
0.000453	0.020741	1	0.476877	0.159131	0.608648	Har_00030404	Har_00030404	gi|112982896|ref|NP_001037576.1|small GTP binding protein RAB8 [Bombyx mori] >gi|95102574|gb|ABF51225.1| small GTP binding protein RAB8 [Bombyx mori] >gi|102993217|gb|ABF71468.1| ras-related GTP-binding protein Rab8 [Bombyx mori]
2.6e-05	0.00609181	1	0.488341	0.166601	0.564764	Har_00074966	Har_00074966	gi|116833215|gb|ABK29520.1|CG13607-PA-like protein [Helicoverpa armigera]
0.000838	0.0277006	1	0.387146	0.253622	0.466464	Har_00095663	Har_00095663	gi|160333326|ref|NP_001103818.1|thymosin isoform 2 [Bombyx mori] >gi|95103092|gb|ABF51487.1| thymosin isoform 2 [Bombyx mori] >gi|221579752|gb|ACM24356.1| thymosin isoform 2 [Bombyx mori]
7.2e-05	0.00887382	1	0.431167	0.156117	0.678418	Har_00105642	Har_00105642	gi|169179420|ref|XP_001716488.1|PREDICTED: hypothetical protein [Homo sapiens]
0.001905	0.0431584	1	0.37684	0.317984	0.37995	Har_00091201	Har_00091201	gi|156541630|ref|XP_001601986.1|PREDICTED: hypothetical protein [Nasonia vitripennis]
0.002371	0.0481224	1	0.303174	0.412236	0.363893	Har_00050644	Har_00050644	gi|32394732|gb|AAM96925.1|defensin precursor [Spodoptera frugiperda] >gi|33439714|gb|AAQ18895.1| spodoptericin [Spodoptera frugiperda]
0.000148	0.0123707	1	0.321449	0.278643	0.506565	Har_00083263	Har_00083263	gi|56418393|gb|AAV91004.1|hemolymph proteinase 6 [Manduca sexta]
0.001888	0.0430319	1	0.443094	0.195517	0.522583	Har_00083025	Har_00083025	gi|114051139|ref|NP_001040394.1|vacuolar protein sorting 37B [Bombyx mori] >gi|95102730|gb|ABF51306.1| vacuolar protein sorting 37B [Bombyx mori]
1.7e-05	0.00512493	1	0.358449	0.232657	0.541732	Har_00179426	Har_00179426	na
6.5e-05	0.00837407	1	0.682031	1.5913	0.105318	Har_00139692	Har_00139692	na
0.000463	0.0209578	1	0.361706	0.15417	0.808265	Har_00127840	Har_00127840	na
2.6e-05	0.00609181	1	0.443412	0.251354	0.403545	Har_00074183	Har_00074183	gi|114052504|ref|NP_001040344.1|proteasome 25 kDa subunit [Bombyx mori] >gi|95102572|gb|ABF51224.1| proteasome 25 kDa subunit [Bombyx mori]
0.000399	0.0192971	1	0.412801	0.126977	1.16654	Har_00069078	Har_00069078	gi|5869987|emb|CAB55604.1|methionine-rich storage protein [Spodoptera litura]
1.3e-05	0.004522	1	0.345216	0.173396	0.748576	Har_00052133	Har_00052133	gi|157112314|ref|XP_001657491.1|clathrin light chain [Aedes aegypti] >gi|108883764|gb|EAT47989.1| clathrin light chain [Aedes aegypti]
0.002326	0.0476549	1	0.459587	0.317967	0.305857	Har_00051646	Har_00051646	gi|189234957|ref|XP_973182.2|PREDICTED: similar to CG17754 CG17754-PC [Tribolium castaneum]
0.002075	0.0451547	1	0.38891	0.322445	0.35599	Har_00052917	Har_00052917	na
0.000174	0.013092	1	0.449293	0.221243	0.447838	Har_00026924	Har_00026924	gi|114052504|ref|NP_001040344.1|proteasome 25 kDa subunit [Bombyx mori] >gi|95102572|gb|ABF51224.1| proteasome 25 kDa subunit [Bombyx mori]
0.001061	0.0314909	1	0.408473	0.237844	0.457002	Har_00067312	Har_00067312	gi|170062088|ref|XP_001866517.1|26S protease regulatory subunit 6A [Culex quinquefasciatus] >gi|167880127|gb|EDS43510.1| 26S protease regulatory subunit 6A [Culex quinquefasciatus]
0.000346	0.0180671	1	0.381811	0.118615	1.02332	-	DarkCorner	na
0.001671	0.0404294	1	0.240026	0.276621	1.50624	Har_00003595	Har_00003595	gi|146345325|gb|ABQ23674.1|very high density lipoprotein [Helicoverpa zea]
0.001901	0.0431584	1	0.403664	0.264841	0.411107	Har_00082290	Har_00082290	gi|183979392|dbj|BAG30748.1|hypothetical protein [Papilio xuthus]
0.000668	0.0250432	1	0.444032	0.318621	0.309327	Har_00088879	Har_00088879	gi|158289641|ref|XP_311324.4|AGAP000785-PA [Anopheles gambiae str. PEST] >gi|157018615|gb|EAA06813.4| AGAP000785-PA [Anopheles gambiae str. PEST]
0.000471	0.0211716	1	0.45247	0.117671	0.819521	Har_00116899	Har_00116899	gi|110759885|ref|XP_001120370.1|PREDICTED: similar to CG10660-PA [Apis mellifera]
7.8e-05	0.00909062	1	0.369912	0.281074	0.416446	Har_00072404	Har_00072404	gi|148298816|ref|NP_001091810.1|proteasome 26S non-ATPase subunit 4 [Bombyx mori] >gi|87248383|gb|ABD36244.1| proteasome 26S non-ATPase subunit 4 [Bombyx mori]
0.001427	0.0370524	1	0.351186	0.357272	0.344578	Har_00080002	Har_00080002	gi|157127935|ref|XP_001661235.1|ctl2 [Aedes aegypti] >gi|108882295|gb|EAT46520.1| ctl2 [Aedes aegypti]
0.000313	0.0171354	1	0.32554	0.24266	0.546234	Har_00107343	Har_00107343	gi|157119230|ref|XP_001653312.1|hypothetical protein AaeL_AAEL008577 [Aedes aegypti] >gi|108875410|gb|EAT39635.1| conserved hypothetical protein [Aedes aegypti]
0.000367	0.0185843	1	0.436844	0.138239	0.711117	Har_00012597	Har_00012597	gi|66550449|ref|XP_395261.2|PREDICTED: similar to lethal (2) NC136 CG8426-PA [Apis mellifera]
5.1e-05	0.00751212	1	0.33484	0.22343	0.573856	Har_00075848	Har_00075848	gi|114051245|ref|NP_001040387.1|proteasome alpha 3 subunit [Bombyx mori] >gi|95102712|gb|ABF51297.1| proteasome alpha 3 subunit [Bombyx mori]
8.8e-05	0.00972121	1	0.405328	0.228313	0.463217	Har_00088405	Har_00088405	gi|193610500|ref|XP_001946702.1|PREDICTED: similar to GA18834-PA [Acyrthosiphon pisum]
0.002382	0.0481511	1	0.389835	0.282285	0.386305	Har_00081695	Har_00081695	gi|112984548|ref|NP_001037205.1|serpin-5 [Bombyx mori] >gi|45594230|gb|AAS68506.1| serpin-5 [Bombyx mori]
0.001059	0.0314909	1	0.372599	0.362264	0.314586	Har_00018752	Har_00018752	gi|2960216|emb|CAA11285.1|26S proteasome regulatory ATPase subunit 10b (S10b) [Manduca sexta]
0.001001	0.0307927	1	0.395185	0.308797	0.346681	Har_00032510	Har_00032510	gi|18140733|gb|AAL60414.1|AF393489_1twelve cysteine protein 1 [Manduca sexta]
3.5e-05	0.00676368	1	0.389118	0.256713	0.421262	Har_00112526	Har_00112526	gi|126302731|ref|XP_001368264.1|PREDICTED: similar to Usp5 protein [Monodelphis domestica]
0.000731	0.0260898	1	0.388552	0.318709	0.339753	Har_00031977	Har_00031977	gi|18140733|gb|AAL60414.1|AF393489_1twelve cysteine protein 1 [Manduca sexta]
0.000707	0.0257619	1	0.327548	0.133464	0.957212	Har_00220594	Har_00220594	na
0.000532	0.0225464	1	0.394676	0.317041	0.334132	Har_00075961	Har_00075961	gi|156541630|ref|XP_001601986.1|PREDICTED: hypothetical protein [Nasonia vitripennis]
0.00203	0.0444751	1	0.413509	0.107069	0.943373	-	DarkCorner	na
0.00249	0.0490195	1	0.399989	0.255749	0.407213	Har_00193279	Har_00193279	na
0.000455	0.020741	1	0.961034	1.84476	0.0797412	Har_00151861	Har_00151861	na
0.000306	0.0169575	1	0.446719	0.229489	0.403911	Har_00070863	Har_00070863	gi|114052645|ref|NP_001040486.1|thymosin isoform 1 [Bombyx mori] >gi|95103090|gb|ABF51486.1| thymosin isoform 1 [Bombyx mori]
9e-06	0.00383943	1	0.319281	0.215191	0.602403	Har_00216550	Har_00216550	gi|115449645|ref|NP_001048517.1|Os02g0816900 [Oryza sativa (japonica cultivar-group)] >gi|113538048|dbj|BAF10431.1| Os02g0816900 [Oryza sativa (japonica cultivar-group)]
0.000362	0.0184968	1	0.403674	0.219069	0.466523	Har_00037559	Har_00037559	gi|208972533|gb|ACI32827.1|beta-1,3-glucan recognition protein 2b [Helicoverpa armigera]
0.001003	0.0308123	1	0.448502	0.265259	0.34595	Har_00049133	Har_00049133	gi|223671398|tpd|FAA00651.1|TPA: putative cuticle protein [Bombyx mori]
0.000751	0.0263666	1	0.416757	0.944374	0.104542	Har_00103132	Har_00103132	gi|223890176|ref|NP_001138803.1|hypothetical protein LOC100270783 [Bombyx mori] >gi|221579742|gb|ACM24355.1| L130 [Bombyx mori]
0.002558	0.0497731	1	0.400738	0.215462	0.475505	Har_00068451	Har_00068451	gi|114052274|ref|NP_001040467.1|copper transporter [Bombyx mori] >gi|95103022|gb|ABF51452.1| copper transporter [Bombyx mori]
0.000894	0.0288261	1	0.357204	0.160262	1.39647	Har_00093124	Har_00093124	gi|112983138|ref|NP_001037040.1|phenol UDP-glucosyltransferase [Bombyx mori] >gi|18028141|gb|AAL55994.1|AF324465_1 phenol UDP-glucosyltransferase [Bombyx mori]
0.001042	0.0312669	1	0.318212	0.172598	0.741838	Har_00100034	Har_00100034	gi|156551613|ref|XP_001600684.1|PREDICTED: similar to 2-Keto-3-deoxy-(6-phospho-)gluconate aldolase, putative [Nasonia vitripennis]
0.002511	0.0492186	1	0.453797	0.175045	0.512321	Har_00029694	Har_00029694	gi|114052040|ref|NP_001040211.1|Rab-related protein [Bombyx mori] >gi|87248399|gb|ABD36252.1| Rab-related protein [Bombyx mori]
4e-05	0.00709333	1	0.397413	0.208697	0.488314	Har_00030826	Har_00030826	gi|194910105|ref|XP_001982075.1|GG12390 [Drosophila erecta] >gi|195445240|ref|XP_002070237.1| GK11948 [Drosophila willistoni] >gi|195505012|ref|XP_002099325.1| GE10845 [Drosophila yakuba] >gi|190656713|gb|EDV53945.1| GG12390 [Drosophila erecta] >gi|1
5.4e-05	0.007752	1	0.333268	0.184459	0.658619	Har_00015851	Har_00015851	gi|91087215|ref|XP_975476.1|PREDICTED: similar to clathrin coat assembly protein ap17 [Tribolium castaneum]
7.8e-05	0.00909062	1	0.378173	0.22467	0.474109	Har_00049818	Har_00049818	gi|158286215|ref|XP_308626.4|AGAP007135-PA [Anopheles gambiae str. PEST] >gi|157020362|gb|EAA04156.5| AGAP007135-PA [Anopheles gambiae str. PEST]
0.002381	0.0481511	1	0.361607	0.172174	0.646954	Har_00015678	Har_00015678	gi|157111941|ref|XP_001651759.1|hypothetical protein AaeL_AAEL006002 [Aedes aegypti] >gi|108878230|gb|EAT42455.1| conserved hypothetical protein [Aedes aegypti]
0.000167	0.012865	1	0.539835	0.10295	0.721449	Har_00030031	Har_00030031	gi|122894084|gb|ABM67688.1|chemosensory protein CSP1 [Spodoptera exigua]
0.000767	0.0266388	1	0.309067	0.152259	0.851713	Har_00013467	Har_00013467	gi|116789445|gb|ABK25249.1|unknown [Picea sitchensis]
0.00037	0.0186111	1	0.306265	0.387526	0.33702	Har_00072745	Har_00072745	gi|56418417|gb|AAV91016.1|hemolymph proteinase 18 [Manduca sexta]
0.001391	0.0366279	1	0.289256	0.238826	0.576008	Har_00198829	Har_00198829	na
0.000196	0.0136777	1	0.365849	0.248225	0.435773	Har_00201768	Har_00201768	na
2.8e-05	0.0062993	1	0.339071	0.218694	0.533348	Har_00088765	Har_00088765	gi|219422030|ref|XP_002208815.1|hypothetical protein BRAFLDRAFT_119698 [Branchiostoma floridae] >gi|210123853|gb|EEA71552.1| hypothetical protein BRAFLDRAFT_119698 [Branchiostoma floridae]
0.000644	0.0246376	1	0.331771	0.58181	0.204379	Har_00000415	Har_00000415	gi|38679393|gb|AAR26518.1|antennal cytochrome P450 CYP9 [Mamestra brassicae]
9.9e-05	0.0100828	1	0.36011	0.19564	0.559857	Har_00003486	Har_00003486	gi|219881450|gb|ACL51928.1|lysozyme precursor [Helicoverpa zea]
0.000681	0.0252417	1	0.329309	0.135032	1.12939	Har_00076344	Har_00076344	gi|170035237|ref|XP_001845477.1|aliphatic nitrilase [Culex quinquefasciatus] >gi|167877127|gb|EDS40510.1| aliphatic nitrilase [Culex quinquefasciatus]
0.00071	0.0257674	1	0.400418	0.259343	0.378937	Har_00046851	Har_00046851	gi|148906034|gb|ABR16176.1|unknown [Picea sitchensis]
0.000778	0.0268289	1	0.362262	0.341019	0.318287	Har_00026195	Har_00026195	gi|157109474|ref|XP_001650687.1|ornithine aminotransferase [Aedes aegypti] >gi|108879017|gb|EAT43242.1| ornithine aminotransferase [Aedes aegypti]
0.001378	0.0364831	1	0.363796	0.10846	0.99645	Har_00098013	Har_00098013	gi|114050771|ref|NP_001040154.1|short-chain dehydrogenease/reductase [Bombyx mori] >gi|87248225|gb|ABD36165.1| short-chain dehydrogenease/reductase [Bombyx mori]
0.000297	0.0167879	1	0.426105	0.30662	0.300608	Har_00054926	Har_00054926	gi|18140733|gb|AAL60414.1|AF393489_1twelve cysteine protein 1 [Manduca sexta]
0.00078	0.0268365	1	0.405728	0.272696	0.35444	Har_00090051	Har_00090051	gi|158289641|ref|XP_311324.4|AGAP000785-PA [Anopheles gambiae str. PEST] >gi|157018615|gb|EAA06813.4| AGAP000785-PA [Anopheles gambiae str. PEST]
0.000182	0.0133172	1	0.274336	0.334983	0.426698	Har_00085596	Har_00085596	gi|170060741|ref|XP_001865935.1|conserved hypothetical protein [Culex quinquefasciatus] >gi|167879116|gb|EDS42499.1| conserved hypothetical protein [Culex quinquefasciatus]
3.8e-05	0.00707144	1	0.35152	0.26707	0.416489	Har_00229027	Har_00229027	na
0.001138	0.0327356	1	0.333866	0.228102	0.513412	Har_00043390	Har_00043390	gi|114052504|ref|NP_001040344.1|proteasome 25 kDa subunit [Bombyx mori] >gi|95102572|gb|ABF51224.1| proteasome 25 kDa subunit [Bombyx mori]
0.001424	0.0370289	1	0.310372	0.26077	0.480245	Har_00015071	Har_00015071	gi|112984192|ref|NP_001037440.1|pyridoxal kinase [Bombyx mori] >gi|91265776|gb|ABE28378.1| pyridoxal kinase [Bombyx mori]
0.001278	0.0349825	1	0.30946	0.205115	0.611883	Har_00163825	Har_00163825	na
0.001223	0.0340752	1	0.32692	0.151688	0.781041	Har_00022724	Har_00022724	gi|116789445|gb|ABK25249.1|unknown [Picea sitchensis]
0.000811	0.0272798	1	0.37184	0.199973	0.520012	Har_00016951	Har_00016951	gi|114052338|ref|NP_001040238.1|chromatin modifying protein 1b [Bombyx mori] >gi|87248473|gb|ABD36289.1| chromatin modifying protein 1b [Bombyx mori]
0.001279	0.0349887	1	0.386256	0.127902	0.778776	Har_00000318	Har_00000318	gi|21552587|gb|AAM54723.1|cytochrome P450 monooxygenase CYP4M7 [Helicoverpa zea]
0.001686	0.0406618	1	0.245528	0.253699	1.62202	Har_00003598	Har_00003598	gi|146345325|gb|ABQ23674.1|very high density lipoprotein [Helicoverpa zea]
0.001429	0.0370524	1	0.213932	0.349219	0.513353	Har_00118415	Har_00118415	gi|156538623|ref|XP_001608180.1|PREDICTED: similar to short-chain dehydrogenase [Nasonia vitripennis]
1e-06	0.00155931	1	0.323482	0.142344	0.83171	Har_00008586	Har_00008586	na
0.001883	0.0430047	1	0.684788	0.0652685	1.1699	Har_00006638	Har_00006638	gi|189235778|ref|XP_970904.2|PREDICTED: similar to camp and camp-inhibited cgmp 3,5-cyclic phosphodiesterase, partial [Tribolium castaneum]
0.001013	0.0309722	1	0.310719	0.134174	1.09309	Har_00027971	Har_00027971	gi|94471815|gb|ABF21123.1|transferrin [Spodoptera litura]
0.0007	0.0256417	1	0.330262	0.272295	0.424019	Har_00050369	Har_00050369	gi|91080521|ref|XP_971959.1|PREDICTED: similar to 26S proteasome non-ATPase regulatory subunit 8 [Tribolium castaneum]
0.001359	0.0361281	1	0.471686	0.299879	0.268774	Har_00048563	Har_00048563	gi|208972533|gb|ACI32827.1|beta-1,3-glucan recognition protein 2b [Helicoverpa armigera]
0.00134	0.0358549	1	0.388264	0.24023	0.407425	Har_00074785	Har_00074785	gi|118617448|ref|YP_905780.1|PE-PGRS family protein [Mycobacterium ulcerans Agy99] >gi|118569558|gb|ABL04309.1| PE-PGRS family protein [Mycobacterium ulcerans Agy99]
0.001791	0.0420068	1	0.35431	0.193011	0.554546	Har_00095894	Har_00095894	gi|157128017|ref|XP_001661275.1|long-chain-fatty-acid coa ligase [Aedes aegypti] >gi|108872742|gb|EAT36967.1| long-chain-fatty-acid coa ligase [Aedes aegypti]
0.000988	0.030685	1	0.356249	0.325365	0.325689	Har_00099026	Har_00099026	gi|37142938|gb|AAQ88394.1|SV2-like protein 1 [Ctenocephalides felis]
2.9e-05	0.00633517	1	0.419267	0.1275	0.705247	Har_00013691	Har_00013691	gi|18479021|gb|AAL73387.1|AF409102_13-dehydrecdysone 3b-reductase [Trichoplusia ni]
0.00037	0.0186111	1	0.474826	0.105117	0.752926	Har_00034965	Har_00034965	na
0.001435	0.0371441	1	0.346023	0.175303	1.61866	Har_00083682	Har_00083682	gi|114053253|ref|NP_001040525.1|6-phosphogluconate dehydrogenase [Bombyx mori] >gi|95102844|gb|ABF51363.1| 6-phosphogluconate dehydrogenase [Bombyx mori]
0.002478	0.0488865	1	0.361703	0.206505	0.501652	Har_00189926	Har_00189926	na
0.001206	0.0339361	1	0.200409	0.591816	0.313451	Har_00129944	Har_00129944	na
5e-05	0.00751163	1	0.366671	0.305529	0.331623	Har_00042026	Har_00042026	gi|2960216|emb|CAA11285.1|26S proteasome regulatory ATPase subunit 10b (S10b) [Manduca sexta]
0.002563	0.0497847	1	0.349874	0.255919	0.410021	Har_00093998	Har_00093998	gi|195448336|ref|XP_002071613.1|GK10077 [Drosophila willistoni] >gi|194167698|gb|EDW82599.1| GK10077 [Drosophila willistoni]
5.1e-05	0.00751212	1	0.37631	0.209763	0.464131	Har_00092627	Har_00092627	gi|189241070|ref|XP_001808548.1|PREDICTED: similar to AGAP007135-PA [Tribolium castaneum]
0.000373	0.0186789	1	0.377175	0.209241	0.464212	Har_00066664	Har_00066664	gi|91085779|ref|XP_974384.1|PREDICTED: similar to homologue of Sarcophaga 26,29kDa proteinase [Tribolium castaneum]
0.000119	0.0111643	1	0.177776	0.994535	0.207096	Har_00048397	Har_00048397	gi|33439716|gb|AAQ18896.1|gallerimycin [Spodoptera frugiperda] >gi|37929746|gb|AAP69838.1| gallerimycin [Spodoptera frugiperda]
0.000488	0.0215923	1	0.724732	0.0589992	1.16818	Har_00130027	Har_00130027	na
0.001266	0.0347804	1	0.296346	0.226843	0.542606	Har_00044020	Har_00044020	gi|157119230|ref|XP_001653312.1|hypothetical protein AaeL_AAEL008577 [Aedes aegypti] >gi|108875410|gb|EAT39635.1| conserved hypothetical protein [Aedes aegypti]
0.001463	0.0375295	1	0.344322	0.209859	0.502845	Har_00097182	Har_00097182	gi|157103460|ref|XP_001647991.1|hypothetical protein AaeL_AAEL003909 [Aedes aegypti] >gi|108880522|gb|EAT44747.1| conserved hypothetical protein [Aedes aegypti]
0.000325	0.0175585	1	0.379368	0.271222	0.350096	Har_00056464	Har_00056464	gi|2960216|emb|CAA11285.1|26S proteasome regulatory ATPase subunit 10b (S10b) [Manduca sexta]
0.002498	0.0491129	1	0.354937	0.167429	0.605688	Har_00049768	Har_00049768	gi|114052607|ref|NP_001040485.1|SUMO-1 activating enzyme [Bombyx mori] >gi|95103086|gb|ABF51484.1| SUMO-1 activating enzyme [Bombyx mori]
0.002338	0.0477095	1	0.659152	0.420188	0.129713	Har_00239674	Har_00239674	na
0.000164	0.0127424	1	0.36428	0.256518	0.381316	Har_00032634	Har_00032634	gi|124487678|gb|ABN11927.1|putative proteasome 26S subunit, non-ATPase, 2 [Maconellicoccus hirsutus]
0.000544	0.0227136	1	0.418962	0.216862	0.391095	Har_00045960	Har_00045960	na
0.000607	0.0238683	1	0.350398	0.251299	0.403525	Har_00094424	Har_00094424	gi|91085779|ref|XP_974384.1|PREDICTED: similar to homologue of Sarcophaga 26,29kDa proteinase [Tribolium castaneum]
0.000806	0.0272401	1	0.449381	0.204031	0.387065	Har_00039244	Har_00039244	gi|91091506|ref|XP_969096.1|PREDICTED: similar to AGAP012366-PA [Tribolium castaneum]
3.7e-05	0.0069138	1	0.32771	0.28914	0.374483	Har_00056935	Har_00056935	gi|114052086|ref|NP_001040208.1|proteasome 26S non-ATPase subunit 12 [Bombyx mori] >gi|87248393|gb|ABD36249.1| proteasome 26S non-ATPase subunit 12 [Bombyx mori]
0.001796	0.0420417	1	0.380025	0.642892	0.145187	Har_00027242	Har_00027242	gi|6671050|gb|AAF23078.1|AF128867_1glutathione S-transferase [Choristoneura fumiferana]
7.3e-05	0.00887382	1	0.26561	0.168328	1.26713	Har_00112054	Har_00112054	gi|157132466|ref|XP_001662576.1|sodium-bile acid cotransporter [Aedes aegypti] >gi|108871160|gb|EAT35385.1| sodium-bile acid cotransporter [Aedes aegypti]
0.002052	0.0447619	1	0.349488	0.287334	0.350939	Har_00004126	Har_00004126	gi|119887749|gb|ABM05925.1|cathepsin B-like cysteine proteinase [Helicoverpa assulta]
0.000534	0.0225467	1	0.30375	0.369034	0.312701	Har_00089553	Har_00089553	gi|56462138|gb|AAV91352.1|hypothetical protein 1 [Lonomia obliqua]
0.000129	0.0115512	1	0.312362	0.325424	0.344239	Har_00069405	Har_00069405	gi|219686083|emb|CAW30925.1|putative aldo-keto reductase 2 [Papilio dardanus]
0.00229	0.0472417	1	0.397708	0.105097	1.19622	Har_00118790	Har_00118790	gi|195375158|ref|XP_002046370.1|GJ12542 [Drosophila virilis] >gi|194153528|gb|EDW68712.1| GJ12542 [Drosophila virilis]
0.0001	0.0100938	1	0.310729	0.323089	0.346888	Har_00050368	Har_00050368	gi|91080521|ref|XP_971959.1|PREDICTED: similar to 26S proteasome non-ATPase regulatory subunit 8 [Tribolium castaneum]
0.002507	0.0492008	1	0.187484	0.261443	0.708874	Har_00121877	Har_00121877	gi|194277475|gb|ACF39402.1|takeout-like protein 2 [Epiphyas postvittana]
0.000202	0.0138401	1	0.347159	0.196743	0.508627	Har_00030822	Har_00030822	gi|194910105|ref|XP_001982075.1|GG12390 [Drosophila erecta] >gi|195445240|ref|XP_002070237.1| GK11948 [Drosophila willistoni] >gi|195505012|ref|XP_002099325.1| GE10845 [Drosophila yakuba] >gi|190656713|gb|EDV53945.1| GG12390 [Drosophila erecta] >gi|1
0.001578	0.039272	1	0.333544	0.307687	0.335443	Har_00095851	Har_00095851	gi|56418417|gb|AAV91016.1|hemolymph proteinase 18 [Manduca sexta]
0.001964	0.0436852	1	0.80316	0.0567805	0.754263	Har_00004731	Har_00004731	gi|112983138|ref|NP_001037040.1|phenol UDP-glucosyltransferase [Bombyx mori] >gi|18028141|gb|AAL55994.1|AF324465_1 phenol UDP-glucosyltransferase [Bombyx mori]
5.9e-05	0.00808479	1	0.448435	0.133704	1.74534	Har_00086749	Har_00086749	gi|114053253|ref|NP_001040525.1|6-phosphogluconate dehydrogenase [Bombyx mori] >gi|95102844|gb|ABF51363.1| 6-phosphogluconate dehydrogenase [Bombyx mori]
0.001852	0.0428874	1	0.289266	0.323245	0.366974	Har_00089606	Har_00089606	gi|66510978|ref|XP_623365.1|PREDICTED: similar to UBL3 CG9038-PA, isoform A isoform 2 [Apis mellifera]
0.000203	0.0138415	1	0.333834	0.180932	0.566858	Har_00087025	Har_00087025	gi|114051115|ref|NP_001040393.1|ubiquitin conjugating enzyme E2 [Bombyx mori] >gi|95102728|gb|ABF51305.1| ubiquitin conjugating enzyme E2 [Bombyx mori]
0.000102	0.0101574	1	0.310153	0.222467	0.49557	Har_00045605	Har_00045605	gi|124513752|ref|XP_001350232.1|hypothetical protein [Plasmodium falciparum 3D7] >gi|23615649|emb|CAD52641.1| hypothetical protein [Plasmodium falciparum 3D7]
0.000548	0.0227136	1	0.321997	0.240636	0.441084	Har_00188409	Har_00188409	na
5.8e-05	0.00804528	1	0.358154	0.181141	0.526695	Har_00090235	Har_00090235	gi|91093363|ref|XP_969584.1|PREDICTED: similar to CG10576 CG10576-PA [Tribolium castaneum]
0.001998	0.044116	1	0.788913	0.0494932	1.1436	Har_00018852	Har_00018852	gi|112983390|ref|NP_001036987.1|hypothetical protein LOC692536 [Bombyx mori] >gi|73992802|dbj|BAE43414.1| hypothetical protein [Bombyx mori]
7e-06	0.00329729	1	0.392976	0.194139	0.447367	Har_00025428	Har_00025428	gi|114052504|ref|NP_001040344.1|proteasome 25 kDa subunit [Bombyx mori] >gi|95102572|gb|ABF51224.1| proteasome 25 kDa subunit [Bombyx mori]
0.001477	0.0376493	1	0.29853	0.399035	0.285537	Har_00091285	Har_00091285	gi|170059616|ref|XP_001865440.1|stumps [Culex quinquefasciatus] >gi|167878329|gb|EDS41712.1| stumps [Culex quinquefasciatus]
0.000572	0.0233236	1	0.268113	0.344777	0.367675	Har_00114332	Har_00114332	gi|91079260|ref|XP_971902.1|PREDICTED: similar to AGAP005012-PA [Tribolium castaneum]
0.001963	0.0436845	1	0.328784	0.309314	0.333683	Har_00090049	Har_00090049	gi|158289641|ref|XP_311324.4|AGAP000785-PA [Anopheles gambiae str. PEST] >gi|157018615|gb|EAA06813.4| AGAP000785-PA [Anopheles gambiae str. PEST]
0.000373	0.0186789	1	0.396456	0.110148	0.777007	Har_00009624	Har_00009624	gi|157136701|ref|XP_001656882.1|hypothetical protein AaeL_AAEL013612 [Aedes aegypti] >gi|108869890|gb|EAT34115.1| conserved hypothetical protein [Aedes aegypti]
0.001794	0.0420335	1	0.480607	0.105771	0.666705	Har_00133934	Har_00133934	na
0.001237	0.0343805	1	0.47126	0.175394	0.409644	Har_00191154	Har_00191154	na
0.000719	0.0258811	1	0.336069	0.211645	0.475897	Har_00111573	Har_00111573	gi|195450917|ref|XP_002072688.1|GK13553 [Drosophila willistoni] >gi|194168773|gb|EDW83674.1| GK13553 [Drosophila willistoni]
0.000169	0.0129309	1	0.338786	0.244803	0.406539	Har_00096111	Har_00096111	gi|170060741|ref|XP_001865935.1|conserved hypothetical protein [Culex quinquefasciatus] >gi|167879116|gb|EDS42499.1| conserved hypothetical protein [Culex quinquefasciatus]
0.000354	0.0183366	1	0.393515	0.226068	0.378032	Har_00033004	Har_00033004	gi|156555710|ref|XP_001603237.1|PREDICTED: similar to RE03018p, partial [Nasonia vitripennis]
0.00187	0.0429464	1	0.746146	0.0644181	1.42993	Har_00035440	Har_00035440	gi|194745430|ref|XP_001955191.1|GF16367 [Drosophila ananassae] >gi|190628228|gb|EDV43752.1| GF16367 [Drosophila ananassae]
0.000758	0.0264481	1	0.304341	0.22195	0.496545	Har_00050957	Har_00050957	gi|112984088|ref|NP_001037428.1|yellow4 [Bombyx mori] >gi|86450723|gb|ABC96697.1| yellow-fb [Bombyx mori]
3.9e-05	0.00708265	1	0.381599	0.286799	0.306341	Har_00033504	Har_00033504	gi|18140733|gb|AAL60414.1|AF393489_1twelve cysteine protein 1 [Manduca sexta]
1.2e-05	0.00444787	1	0.353304	0.246628	0.384517	Har_00025687	Har_00025687	gi|1709799|sp|P54814.1|PRS8_MANSERecName: Full=26S protease regulatory subunit 8; AltName: Full=18-56 protein >gi|1167963|gb|AAC46996.1| 18-56 protein
4.3e-05	0.0072882	1	0.421876	0.227061	0.349618	Har_00087346	Har_00087346	gi|114053311|ref|NP_001040338.1|26S protease regulatory subunit 6B [Bombyx mori] >gi|95102554|gb|ABF51215.1| 26S protease regulatory subunit 6B [Bombyx mori]
0.001641	0.0400248	1	0.379767	0.144998	0.605666	Har_00054066	Har_00054066	gi|66526670|ref|XP_624161.1|PREDICTED: similar to uninitiated CG4008-PA [Apis mellifera]
6.9e-05	0.00861928	1	0.311967	0.177343	0.597771	Har_00080959	Har_00080959	gi|91087215|ref|XP_975476.1|PREDICTED: similar to clathrin coat assembly protein ap17 [Tribolium castaneum]
1.3e-05	0.004522	1	0.343916	0.237867	0.403665	Har_00042025	Har_00042025	gi|2960216|emb|CAA11285.1|26S proteasome regulatory ATPase subunit 10b (S10b) [Manduca sexta]
1.1e-05	0.0042881	1	0.353465	0.26817	0.347324	Har_00033886	Har_00033886	gi|18140733|gb|AAL60414.1|AF393489_1twelve cysteine protein 1 [Manduca sexta]
0.001653	0.0402091	1	0.53401	0.0775795	0.794247	Har_00031249	Har_00031249	gi|195015937|ref|XP_001984307.1|GH16377 [Drosophila grimshawi] >gi|193897789|gb|EDV96655.1| GH16377 [Drosophila grimshawi]
0.000967	0.0301987	1	0.279295	0.219515	0.534188	Har_00135553	Har_00135553	na
0.0014	0.0367216	1	0.603523	0.814609	0.0664545	Har_00118607	Har_00118607	gi|212513281|gb|EEB15880.1|conserved hypothetical protein [Pediculus humanus corporis]
3.2e-05	0.00673042	1	0.363277	0.185466	0.484628	Har_00233771	Har_00233771	na
0	0	1	0.277548	0.211826	0.554457	Har_00094627	Har_00094627	gi|56418393|gb|AAV91004.1|hemolymph proteinase 6 [Manduca sexta]
0.000528	0.0225035	1	0.389819	0.195832	0.425062	Har_00039243	Har_00039243	gi|91091506|ref|XP_969096.1|PREDICTED: similar to AGAP012366-PA [Tribolium castaneum]
4.8e-05	0.00745897	1	0.166743	0.277564	0.70089	Har_00002727	Har_00002727	gi|2463076|emb|CAA72958.1|chymotrypsin-like protease [Helicoverpa armigera]
4.6e-05	0.00737965	1	0.353941	0.210266	0.4352	Har_00057087	Har_00057087	gi|194747004|ref|XP_001955944.1|GF24843 [Drosophila ananassae] >gi|190623226|gb|EDV38750.1| GF24843 [Drosophila ananassae]
0.000548	0.0227136	1	0.348718	0.188795	0.486015	Har_00005235	Har_00005235	gi|195469900|ref|XP_002099874.1|GE16477 [Drosophila yakuba] >gi|194187398|gb|EDX00982.1| GE16477 [Drosophila yakuba]
0.000992	0.0307038	1	0.396694	0.0852173	1.06932	Har_00011287	Har_00011287	gi|219815604|gb|ACL36977.1|putative ecdysone oxidase [Helicoverpa zea]
3.5e-05	0.00676368	1	0.419656	0.216473	0.346615	Har_00084178	Har_00084178	gi|114053311|ref|NP_001040338.1|26S protease regulatory subunit 6B [Bombyx mori] >gi|95102554|gb|ABF51215.1| 26S protease regulatory subunit 6B [Bombyx mori]
0.000378	0.0187631	1	0.278784	0.14397	0.784001	Har_00000866	Har_00000866	gi|21552587|gb|AAM54723.1|cytochrome P450 monooxygenase CYP4M7 [Helicoverpa zea]
0.001855	0.0428874	1	0.444104	0.099098	1.40166	Har_00005594	Har_00005594	gi|15824041|dbj|BAB68549.1|dopa decarboxylase [Mythimna separata]
0.000247	0.0153636	1	0.274904	0.394265	0.288802	Har_00226916	Har_00226916	na
0.000774	0.0267996	1	0.913078	0.0444689	1.29913	Har_00043393	Har_00043393	gi|195114134|ref|XP_002001622.1|GI16741 [Drosophila mojavensis] >gi|193912197|gb|EDW11064.1| GI16741 [Drosophila mojavensis]
0.002207	0.0463301	1	0.309216	0.269322	0.37382	Har_00050335	Har_00050335	gi|66510978|ref|XP_623365.1|PREDICTED: similar to UBL3 CG9038-PA, isoform A isoform 2 [Apis mellifera]
0.001062	0.0314909	1	0.318725	0.167932	0.58003	Har_00077750	Har_00077750	gi|219881450|gb|ACL51928.1|lysozyme precursor [Helicoverpa zea]
0.000905	0.0290448	1	0.275183	0.251255	0.446444	Har_00120581	Har_00120581	gi|112984088|ref|NP_001037428.1|yellow4 [Bombyx mori] >gi|86450723|gb|ABC96697.1| yellow-fb [Bombyx mori]
0.002223	0.0464953	1	0.321845	0.800926	0.11968	Har_00038024	Har_00038024	gi|157108872|ref|XP_001650424.1|hypothetical protein AaeL_AAEL005148 [Aedes aegypti] >gi|108879202|gb|EAT43427.1| conserved hypothetical protein [Aedes aegypti]
0.001322	0.0357553	1	0.230202	0.167683	0.798619	Har_00223731	Har_00223731	na
0.00204	0.0445646	1	0.316189	0.632864	0.153674	Har_00027240	Har_00027240	gi|6671050|gb|AAF23078.1|AF128867_1glutathione S-transferase [Choristoneura fumiferana]
0.000491	0.0216615	1	0.685705	0.0618591	0.723809	Har_00141600	Har_00141600	na
0.001846	0.0428083	1	0.159272	0.300254	1.55772	Har_00119209	Har_00119209	gi|193620155|ref|XP_001952146.1|PREDICTED: hypothetical protein [Acyrthosiphon pisum]
0.001876	0.0429544	1	0.796005	0.0427652	0.898793	Har_00000188	Har_00000188	gi|163838676|ref|NP_001106221.1|cytochrome P450 [Bombyx mori] >gi|95103020|gb|ABF51451.1| cytochrome P450 [Bombyx mori]
0.002169	0.0460684	1	0.533245	1.62437	0.0931326	Har_00107517	Har_00107517	gi|193617631|ref|XP_001951863.1|PREDICTED: hypothetical protein [Acyrthosiphon pisum]
0.000454	0.020741	1	0.329167	0.277385	0.332932	Har_00003256	Har_00003256	gi|7537454|gb|AAF35867.2|cathepsin B-like cysteine proteinase [Helicoverpa armigera]
4.4e-05	0.0072882	1	0.30219	0.19391	0.51562	Har_00016168	Har_00016168	gi|124802640|ref|XP_001347544.1|hypothetical protein [Plasmodium falciparum 3D7] >gi|23495126|gb|AAN35457.1|AE014833_28 hypothetical protein PF10_0260 [Plasmodium falciparum 3D7]
0.001258	0.034687	1	0.677128	0.0460633	1.03702	Har_00147150	Har_00147150	na
0.002328	0.0476549	1	0.346989	0.283112	0.304845	Har_00051645	Har_00051645	gi|189234957|ref|XP_973182.2|PREDICTED: similar to CG17754 CG17754-PC [Tribolium castaneum]
9e-05	0.00975971	1	0.334031	0.150042	1.67712	Har_00083674	Har_00083674	gi|114053253|ref|NP_001040525.1|6-phosphogluconate dehydrogenase [Bombyx mori] >gi|95102844|gb|ABF51363.1| 6-phosphogluconate dehydrogenase [Bombyx mori]
0.000566	0.0231834	1	0.30913	0.214771	0.44982	Har_00036278	Har_00036278	gi|170062088|ref|XP_001866517.1|26S protease regulatory subunit 6A [Culex quinquefasciatus] >gi|167880127|gb|EDS43510.1| 26S protease regulatory subunit 6A [Culex quinquefasciatus]
0.000686	0.0253646	1	0.346226	0.24267	0.352666	Har_00020692	Har_00020692	gi|37142938|gb|AAQ88394.1|SV2-like protein 1 [Ctenocephalides felis]
0.00043	0.0202971	1	0.359019	0.107183	0.758721	Har_00003756	Har_00003756	gi|21552587|gb|AAM54723.1|cytochrome P450 monooxygenase CYP4M7 [Helicoverpa zea]
5.7e-05	0.00798	1	0.439215	0.12468	1.89154	Har_00086748	Har_00086748	gi|114053253|ref|NP_001040525.1|6-phosphogluconate dehydrogenase [Bombyx mori] >gi|95102844|gb|ABF51363.1| 6-phosphogluconate dehydrogenase [Bombyx mori]
0.000715	0.0258606	1	0.366433	0.138515	1.75386	Har_00116955	Har_00116955	gi|149639093|ref|XP_001509796.1|PREDICTED: similar to Phosphogluconate dehydrogenase [Ornithorhynchus anatinus]
0.001772	0.041756	1	0.320147	0.23369	0.386167	Har_00097428	Har_00097428	gi|37142938|gb|AAQ88394.1|SV2-like protein 1 [Ctenocephalides felis]
6.2e-05	0.008246	1	0.359825	0.175971	0.454929	Har_00026487	Har_00026487	gi|193610500|ref|XP_001946702.1|PREDICTED: similar to GA18834-PA [Acyrthosiphon pisum]
0.001616	0.0397366	1	0.27099	0.34716	0.306176	Har_00086189	Har_00086189	gi|157120853|ref|XP_001659780.1|hypothetical protein AaeL_AAEL009148 [Aedes aegypti] >gi|108874801|gb|EAT39026.1| hypothetical protein AaeL_AAEL009148 [Aedes aegypti]
0.001555	0.0389137	1	0.369678	0.225649	0.34524	Har_00100914	Har_00100914	gi|116782397|gb|ABK22491.1|unknown [Picea sitchensis]
0.00024	0.0150943	1	0.287885	0.219652	0.452463	Har_00042220	Har_00042220	na
0.00044	0.0205165	1	0.37387	0.147135	0.519358	Har_00003426	Har_00003426	gi|6466837|gb|AAF13053.1|AF182171_1cytochrome P450 [Helicoverpa armigera]
0.000291	0.016594	1	0.246446	0.198008	1.72611	Har_00043493	Har_00043493	gi|156537446|ref|XP_001607022.1|PREDICTED: hypothetical protein [Nasonia vitripennis]
0.000212	0.0140156	1	0.315604	0.141697	0.628187	Har_00042801	Har_00042801	gi|91087215|ref|XP_975476.1|PREDICTED: similar to clathrin coat assembly protein ap17 [Tribolium castaneum]
0.001147	0.0329316	1	0.283404	0.337376	0.293662	Har_00022211	Har_00022211	gi|195380465|ref|XP_002048991.1|GJ21009 [Drosophila virilis] >gi|194143788|gb|EDW60184.1| GJ21009 [Drosophila virilis]
0.002172	0.0460684	1	0.345053	0.222316	0.366004	Har_00095877	Har_00095877	gi|91084741|ref|XP_971031.1|PREDICTED: similar to apolipoprotein D [Tribolium castaneum]
0.001356	0.0360908	1	0.362558	0.178476	0.430505	Har_00018578	Har_00018578	gi|157110380|ref|XP_001651077.1|synaptic vesicle protein [Aedes aegypti] >gi|108878748|gb|EAT42973.1| synaptic vesicle protein [Aedes aegypti]
0.002189	0.0461472	1	0.254342	0.173433	1.58365	Har_00225251	Har_00225251	na
0.000554	0.0228993	1	0.332472	0.151671	0.551327	Har_00054869	Har_00054869	gi|219881450|gb|ACL51928.1|lysozyme precursor [Helicoverpa zea]
0.000375	0.0187169	1	0.306451	0.198061	0.457626	Har_00107640	Har_00107640	na
0.001701	0.0409145	1	0.2548	0.16798	0.648119	Har_00110996	Har_00110996	gi|112983164|ref|NP_001036945.1|hypothetical protein LOC692491 [Bombyx mori] >gi|73992794|dbj|BAE43410.1| hypothetical protein [Bombyx mori]
0.000185	0.0134066	1	0.500274	0.0716584	0.77322	Har_00028986	Har_00028986	gi|122894084|gb|ABM67688.1|chemosensory protein CSP1 [Spodoptera exigua]
1.2e-05	0.00444787	1	0.33348	0.174816	0.473354	Har_00198287	Har_00198287	na
0.001098	0.0320126	1	0.271517	0.3103	0.327323	Har_00211195	Har_00211195	na
0.00099	0.0307038	1	0.323088	0.315434	0.270176	Har_00068543	Har_00068543	gi|219416137|ref|XP_002205876.1|hypothetical protein BRAFLDRAFT_118765 [Branchiostoma floridae] >gi|210127161|gb|EEA74845.1| hypothetical protein BRAFLDRAFT_118765 [Branchiostoma floridae]
0.00121	0.0339639	1	0.365707	0.267897	0.28025	Har_00006353	Har_00006353	gi|157109474|ref|XP_001650687.1|ornithine aminotransferase [Aedes aegypti] >gi|108879017|gb|EAT43242.1| ornithine aminotransferase [Aedes aegypti]
0.001794	0.0420335	1	0.294573	0.221778	0.419858	Har_00056161	Har_00056161	gi|37142938|gb|AAQ88394.1|SV2-like protein 1 [Ctenocephalides felis]
3.5e-05	0.00676368	1	0.877724	1.85124	0.0578339	Har_00131132	Har_00131132	na
0.000403	0.0194282	1	0.5284	0.0893018	1.72173	Har_00083117	Har_00083117	gi|169598956|ref|XP_001792901.1|hypothetical protein SNOG_02289 [Phaeosphaeria nodorum SN15] >gi|160704506|gb|EAT90501.2| hypothetical protein SNOG_02289 [Phaeosphaeria nodorum SN15]
3e-06	0.00233897	1	0.238971	0.136234	1.2094	Har_00137762	Har_00137762	na
4.9e-05	0.00748574	1	0.357201	0.182274	0.412638	Har_00024069	Har_00024069	na
0.000129	0.0115512	1	0.352956	0.178113	0.426158	Har_00051842	Har_00051842	gi|197128441|gb|ACH44939.1|putative proteasome 26S subunit ATPase 5 variant 1 [Taeniopygia guttata]
0.001708	0.0409956	1	0.263077	0.298155	0.340863	Har_00036924	Har_00036924	gi|66804485|ref|XP_635975.1|hypothetical protein [Dictyostelium discoideum AX4] >gi|74852031|sp|Q54GU4.1|Y6505_DICDI RecName: Full=Uncharacterized protein DDB_G0289975 >gi|60464351|gb|EAL62500.1| hypothetical protein DDBDRAFT_0219502 [Dictyostelium d
0.002549	0.0496407	1	0.357342	0.214049	0.349203	Har_00085656	Har_00085656	gi|156550707|ref|XP_001605788.1|PREDICTED: similar to motile sperm domain containing 1 [Nasonia vitripennis]
0.001455	0.0374474	1	0.426693	0.419973	0.148377	Har_00109846	Har_00109846	gi|91091318|ref|XP_971426.1|PREDICTED: similar to mitochondrial malate dehydrogenase [Tribolium castaneum]
0.000325	0.0175585	1	0.285543	0.127648	0.721209	Har_00037587	Har_00037587	gi|116789445|gb|ABK25249.1|unknown [Picea sitchensis]
0.002251	0.0468202	1	0.279041	0.334897	0.28091	Har_00037331	Har_00037331	gi|195380465|ref|XP_002048991.1|GJ21009 [Drosophila virilis] >gi|194143788|gb|EDW60184.1| GJ21009 [Drosophila virilis]
2.8e-05	0.0062993	1	0.35451	0.125157	0.584138	Har_00028547	Har_00028547	gi|189239008|ref|XP_001814448.1|PREDICTED: similar to MGC81609 protein [Tribolium castaneum]
0.000607	0.0238683	1	0.589588	1.84488	0.0809032	Har_00119878	Har_00119878	gi|91084469|ref|XP_970666.1|PREDICTED: similar to AGAP001269-PA [Tribolium castaneum]
0.000555	0.0229197	1	0.36701	0.0731545	1.03879	Har_00020682	Har_00020682	gi|156544285|ref|XP_001607051.1|PREDICTED: similar to protein phosphatase 2c gamma [Nasonia vitripennis]
0.00118	0.0334753	1	0.299913	0.23378	0.363197	Har_00042646	Har_00042646	gi|195451173|ref|XP_002072799.1|GK13793 [Drosophila willistoni] >gi|194168884|gb|EDW83785.1| GK13793 [Drosophila willistoni]
0.000122	0.0112819	1	0.37705	0.218931	0.308329	Har_00092297	Har_00092297	gi|114052086|ref|NP_001040208.1|proteasome 26S non-ATPase subunit 12 [Bombyx mori] >gi|87248393|gb|ABD36249.1| proteasome 26S non-ATPase subunit 12 [Bombyx mori]
0.000653	0.0247932	1	0.326955	0.202602	0.382415	Har_00024599	Har_00024599	gi|2960216|emb|CAA11285.1|26S proteasome regulatory ATPase subunit 10b (S10b) [Manduca sexta]
0.001268	0.0347931	1	0.401107	0.161079	0.390873	Har_00024738	Har_00024738	gi|171692131|ref|XP_001910990.1|unnamed protein product [Podospora anserina] >gi|170946014|emb|CAP72815.1| unnamed protein product [Podospora anserina]
0.001445	0.0372749	1	0.277979	0.308083	0.293276	Har_00117905	Har_00117905	gi|195431212|ref|XP_002063641.1|GK22025 [Drosophila willistoni] >gi|194159726|gb|EDW74627.1| GK22025 [Drosophila willistoni]
1.4e-05	0.00462102	1	0.323525	0.161642	0.47424	Har_00201712	Har_00201712	na
0.000842	0.0277921	1	0.453962	0.779291	0.070073	Har_00020575	Har_00020575	gi|212511242|gb|EEB14266.1|hypothetical protein Phum_PHUM289610 [Pediculus humanus corporis]
0.002432	0.0485113	1	0.345096	0.133612	0.536503	Har_00149100	Har_00149100	na
0.000957	0.0301048	1	0.273081	0.349375	0.258818	Har_00012300	Har_00012300	gi|195380465|ref|XP_002048991.1|GJ21009 [Drosophila virilis] >gi|194143788|gb|EDW60184.1| GJ21009 [Drosophila virilis]
0.001905	0.0431584	1	0.266243	0.265392	0.345485	Har_00036917	Har_00036917	gi|66804485|ref|XP_635975.1|hypothetical protein [Dictyostelium discoideum AX4] >gi|74852031|sp|Q54GU4.1|Y6505_DICDI RecName: Full=Uncharacterized protein DDB_G0289975 >gi|60464351|gb|EAL62500.1| hypothetical protein DDBDRAFT_0219502 [Dictyostelium d
0.000221	0.0144208	1	0.402524	0.142399	0.425077	Har_00034881	Har_00034881	gi|189241070|ref|XP_001808548.1|PREDICTED: similar to AGAP007135-PA [Tribolium castaneum]
0.002108	0.0455876	1	0.294826	0.252883	0.325002	Har_00109673	Har_00109673	gi|194767679|ref|XP_001965942.1|GF11431 [Drosophila ananassae] >gi|190619785|gb|EDV35309.1| GF11431 [Drosophila ananassae]
4e-05	0.00709333	1	0.337479	0.133064	0.538657	Har_00062842	Har_00062842	gi|219881450|gb|ACL51928.1|lysozyme precursor [Helicoverpa zea]
0.000176	0.0131767	1	0.327853	0.214357	0.34374	Har_00054925	Har_00054925	gi|18140733|gb|AAL60414.1|AF393489_1twelve cysteine protein 1 [Manduca sexta]
0.002447	0.0485961	1	0.27794	0.275413	0.312863	Har_00128154	Har_00128154	na
1e-06	0.00155931	1	0.283184	0.231292	0.365213	Har_00028015	Har_00028015	gi|183979239|dbj|BAG30781.1|similar to CG10638-PA [Papilio xuthus]
0.002584	0.049978	1	0.300051	0.276276	0.287202	Har_00058571	Har_00058571	gi|183979392|dbj|BAG30748.1|hypothetical protein [Papilio xuthus]
0.000742	0.0262693	1	0.28123	0.267444	0.315004	Har_00040067	Har_00040067	gi|195380465|ref|XP_002048991.1|GJ21009 [Drosophila virilis] >gi|194143788|gb|EDW60184.1| GJ21009 [Drosophila virilis]
[truncated: 355 more rows]
